# Supplementary material for: Factors influencing implementation and sustainability of interventions to improve oral health and related health behaviours in adults experiencing severe and multiple disadvantage: a mixed-methods systematic review
Source: PubMed Central journal article supplement (PMC10806606; doi:10.1136/bmjopen-2023-080160), 2024-01-12
Supplement: bmjopen-2023-080160.draft_revisions.pdf [file bmjopen-2023-080160.draft_revisions.pdf]

# BMJ Open

BMJ Open is committed to open peer review. As part of this commitment we make the peer review history of every article we publish publicly available.

When an article is published we post the peer reviewers' comments and the authors' responses online. We also post the versions of the paper that were used during peer review. These are the versions that the peer review comments apply to.

The versions of the paper that follow are the versions that were submitted during the peer review process. They are not the versions of record or the final published versions. They should not be cited or distributed as the published version of this manuscript.

BMJ Open is an open access journal and the full, final, typeset and author-corrected version of record of the manuscript is available on our site with no access controls, subscription charges or pay-per-view fees (<http://bmjopen.bmj.com>).

If you have any questions on BMJ Open's open peer review process please email [info.bmjopen@bmj.com](mailto:info.bmjopen@bmj.com)

# BMJ Open

## Factors influencing implementation and sustainability of interventions to improve oral health and related health behaviours in adults experiencing severe and multiple disadvantage: A mixed-methods systematic review

|                               |                                                                                                                                                                                                                                                                                                                                                                                                                                                                                                                                                                                                                                                                                                                                                                                                                                                                                                                                                                                                                                                                                                                                                                                                                                                                                                                                                                                                                                                                                                                                                                       |
|-------------------------------|-----------------------------------------------------------------------------------------------------------------------------------------------------------------------------------------------------------------------------------------------------------------------------------------------------------------------------------------------------------------------------------------------------------------------------------------------------------------------------------------------------------------------------------------------------------------------------------------------------------------------------------------------------------------------------------------------------------------------------------------------------------------------------------------------------------------------------------------------------------------------------------------------------------------------------------------------------------------------------------------------------------------------------------------------------------------------------------------------------------------------------------------------------------------------------------------------------------------------------------------------------------------------------------------------------------------------------------------------------------------------------------------------------------------------------------------------------------------------------------------------------------------------------------------------------------------------|
| Journal:                      | <i>BMJ Open</i>                                                                                                                                                                                                                                                                                                                                                                                                                                                                                                                                                                                                                                                                                                                                                                                                                                                                                                                                                                                                                                                                                                                                                                                                                                                                                                                                                                                                                                                                                                                                                       |
| Manuscript ID                 | bmjopen-2023-080160                                                                                                                                                                                                                                                                                                                                                                                                                                                                                                                                                                                                                                                                                                                                                                                                                                                                                                                                                                                                                                                                                                                                                                                                                                                                                                                                                                                                                                                                                                                                                   |
| Article Type:                 | Original research                                                                                                                                                                                                                                                                                                                                                                                                                                                                                                                                                                                                                                                                                                                                                                                                                                                                                                                                                                                                                                                                                                                                                                                                                                                                                                                                                                                                                                                                                                                                                     |
| Date Submitted by the Author: | 22-Sep-2023                                                                                                                                                                                                                                                                                                                                                                                                                                                                                                                                                                                                                                                                                                                                                                                                                                                                                                                                                                                                                                                                                                                                                                                                                                                                                                                                                                                                                                                                                                                                                           |
| Complete List of Authors:     | <p>John , Deepti; Newcastle University Population Health Sciences Institute<br/>         Adams, Emma; Newcastle University Population Health Sciences Institute<br/>         McGowan, Laura; Newcastle University Population Health Sciences Institute<br/>         Joyes, Emma; Newcastle University Population Health Sciences Institute<br/>         Richmond, Catherine; Newcastle University Population Health Sciences Institute<br/>         Beyer, Fiona ; Newcastle University Population Health Sciences Institute, Evidence Synthesis Group and Innovation Observatory<br/>         Landes, David; NHS England and NHS Improvement North East and Yorkshire<br/>         Watt, Richard; University College London, Epidemiology and Public Health; King's College London, King's College Dental Institute<br/>         Sniehotta, Falko; Newcastle University Population Health Sciences Institute, NIHR Policy Research Unit Behavioural Science; Heidelberg University Medical Faculty Mannheim, Department of Public Health, Social and Preventive Medicine, Centre for Preventive Medicine and Digital Health (CPD)<br/>         Paisi, Martha; Plymouth University Peninsula Dental School<br/>         Bambra, Clare; Newcastle University Population Health Sciences Institute<br/>         Craig, Dawn; Newcastle University Population Health Sciences Institute<br/>         Kaner, Eileen; Newcastle University Population Health Sciences Institute<br/>         Ramsay, Sheena; Newcastle University Population Health Sciences Institute</p> |
| Keywords:                     | Health Equity, PUBLIC HEALTH, Behavior                                                                                                                                                                                                                                                                                                                                                                                                                                                                                                                                                                                                                                                                                                                                                                                                                                                                                                                                                                                                                                                                                                                                                                                                                                                                                                                                                                                                                                                                                                                                |
|                               |                                                                                                                                                                                                                                                                                                                                                                                                                                                                                                                                                                                                                                                                                                                                                                                                                                                                                                                                                                                                                                                                                                                                                                                                                                                                                                                                                                                                                                                                                                                                                                       |

SCHOLARONE™  
Manuscripts

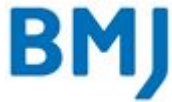

I, the Submitting Author has the right to grant and does grant on behalf of all authors of the Work (as defined in the below author licence), an exclusive licence and/or a non-exclusive licence for contributions from authors who are: i) UK Crown employees; ii) where BMJ has agreed a CC-BY licence shall apply, and/or iii) in accordance with the terms applicable for US Federal Government officers or employees acting as part of their official duties; on a worldwide, perpetual, irrevocable, royalty-free basis to BMJ Publishing Group Ltd ("BMJ") its licensees and where the relevant Journal is co-owned by BMJ to the co-owners of the Journal, to publish the Work in this journal and any other BMJ products and to exploit all rights, as set out in our [licence](#).

The Submitting Author accepts and understands that any supply made under these terms is made by BMJ to the Submitting Author unless you are acting as an employee on behalf of your employer or a postgraduate student of an affiliated institution which is paying any applicable article publishing charge ("APC") for Open Access articles. Where the Submitting Author wishes to make the Work available on an Open Access basis (and intends to pay the relevant APC), the terms of reuse of such Open Access shall be governed by a Creative Commons licence – details of these licences and which [Creative Commons](#) licence will apply to this Work are set out in our licence referred to above.

Other than as permitted in any relevant BMJ Author's Self Archiving Policies, I confirm this Work has not been accepted for publication elsewhere, is not being considered for publication elsewhere and does not duplicate material already published. I confirm all authors consent to publication of this Work and authorise the granting of this licence.

1  
2  
3 **Factors influencing implementation and sustainability of interventions to improve oral health and**  
4 **related health behaviours in adults experiencing severe and multiple disadvantage: A mixed-**  
5 **methods systematic review**  
6  
7

8  
9 **Authors**

10 Mrs. Deepti A. John, MDPH - Population Health Sciences Institute, Newcastle University, Newcastle  
11 Upon Tyne NE2 4AX, UK

12 Ms. Emma A. Adams, MSc. - Population Health Sciences Institute, Newcastle University, Newcastle  
13 Upon Tyne NE2 4AX, UK

14 Dr. Laura J. McGowan, PhD - Population Health Sciences Institute, Newcastle University, Newcastle  
15 Upon Tyne NE2 4AX, UK

16 Dr. Emma C. Joyes, PhD - Population Health Sciences Institute, Newcastle University, Newcastle  
17 Upon Tyne NE2 4AX, UK

18 Ms. Catherine Richmond, MA - Population Health Sciences Institute, Newcastle University,  
19 Newcastle Upon Tyne NE2 4AX, UK

20 Dr. Fiona R. Beyer, PhD - Evidence Synthesis Group and Innovation Observatory, Population Health  
21 Sciences Institute, Newcastle University, Newcastle Upon Tyne NE2 4AX, UK

22 Mr. David Landes, BDS - NHS England & Improvement, Newcastle Upon Tyne NE15 8NY, UK

23 Prof. Richard Watt, PhD - Department of Epidemiology and Public Health, University College London,  
24 London WC1E 7HB, UK

25 Prof. Falko F. Sniehotta, PhD - NIHR Policy Research Unit Behavioural Science, Newcastle University,  
26 NE2 4AX And Department of Public Health, Social and Preventive Medicine, Centre for Preventive  
27 Medicine and Digital Health (CPD), Medical Faculty Mannheim, Heidelberg University, 68167  
28 Mannheim

29 Dr. Martha Paisi, PhD - Faculty of Medicine and Dentistry, Peninsula Dental School, University of  
30 Plymouth, Plymouth PL4 8AA, UK

31 Prof. Clare Bambra, PhD - Population Health Sciences Institute, Newcastle University, Newcastle  
32 Upon Tyne NE2 4AX, UK

33 Prof. Dawn Craig, MSc. - Population Health Sciences Institute, Newcastle University, Newcastle Upon  
34 Tyne NE2 4AX, UK

35 Prof. Eileen Kaner, PhD - Population Health Sciences Institute, Newcastle University, Newcastle Upon  
36 Tyne NE2 4AX, UK

37 Prof. Sheena E. Ramsay, PhD - Population Health Sciences Institute, Newcastle University, Newcastle  
38 Upon Tyne NE2 4AX, UK

39  
40  
41  
42  
43 **Corresponding Author:**

44 Deepti John

45 [Deepti.john@newcastle.ac.uk](mailto:Deepti.john@newcastle.ac.uk)

46 Phone no: +44 7469646623

47 Population Health Sciences Institute, Newcastle University

48 The Baddiley-Clark Building, Richardson Road

49 Newcastle upon Tyne, NE2 4AX

50 United Kingdom  
51  
52  
53  
54  
55  
56  
57  
58  
59  
60

## Abstract

### Objectives

Among people experiencing severe and multiple disadvantage (SMD) poor oral health is common and linked to smoking, substance use and high sugar intake. Studies have explored interventions addressing oral health and related behaviours; however, factors related to the implementation of these interventions remains unclear. This mixed-methods systematic review aimed to synthesize evidence on the implementation and sustainability of interventions to improve oral health and related health behaviours among adults experiencing SMD.

### Methods

Bibliographic databases (MEDLINE, EMBASE, PsycINFO, CINAHL, EBSCO, Scopus) and grey literature were searched from inception to February 2023. Studies meeting the inclusion criteria were screened and extracted independently by two researchers. Quality appraisal was undertaken, and results were synthesised using narrative and thematic analyses.

### Results

Seventeen papers were included (published between 1995-2022). Studies were mostly of moderate quality and included views from SMD groups and service providers. From the qualitative synthesis, most findings were related to aspects such as trust, resources, and motivation levels of SMD groups and service providers. None of the studies reported on diet and none included repeated offending (one of the aspects of SMD). From the quantitative synthesis, no difference was observed in program attendance between the interventions and usual care, although there was some indication of sustained improvements in participation in the intervention group.

### Conclusion

This review provides some evidence that trust, adequate resources, and motivation levels are potentially important in implementing interventions to improve oral health and substance use among SMD groups. Further research is needed from high quality studies and focusing on diet in this population.

### Strengths and limitations of this study

- Comprehensive search strategy was used to gather evidence in this mixed methods systematic review.

- Consolidated Framework for Implementation Research (CFIR) was used for the data extraction.
- Confidence in the papers were limited due to moderate quality of the papers.
- The included studies were not excluded based on their quality, as they contributed relevant information for this systematic review.

**Keywords:** multiple disadvantage, homeless, oral health, implementation

## INTRODUCTION

Severe and multiple disadvantaged (SMD) populations are individuals who have experienced homelessness, substance use, offending or a combination of all three.<sup>1</sup> They experience disproportionately high levels of poor physical and mental health along with high levels of occupational deprivation,<sup>1</sup> which results in isolation and difficulty in accessing healthcare services.<sup>2</sup> There is also an added burden of stigma that affects their access and engagement.<sup>3</sup>

Among people experiencing SMD, oral health problems have been highlighted as one of the major unmet needs.<sup>4</sup> Aggravated by high levels of smoking, substance and alcohol use and poor diet (high intake of sugar).<sup>4, 5</sup> Elevated tobacco use make them more susceptible to periodontal disease, tooth loss, oral lesions and oral cancer.<sup>5, 6</sup> Research also shows that they do not meet the daily nutritional requirements and have high levels of sugar consumption.<sup>6, 7</sup> Oral health has an overall impact on physical and mental wellbeing.<sup>8</sup> It is, therefore, important to not only address oral health concerns in people experiencing SMD, but also related health behaviours such as smoking, alcohol and substance use, and poor nutrition.<sup>1, 9</sup>

Previous papers focus on intervention design and outcomes, none focus on the implementation approach of these intervention especially in people experiencing SMD.<sup>10-12</sup> Hence, there is a need for evidence on interventions addressing these health challenges, with a specific focus on ways to improve implementation and long-term sustainability of interventions. Frameworks are used to apply a theoretical underpinning to our understanding of why implementation of interventions succeed or fail. The Consolidated Framework for implementation Research (CFIR) composed of five domains was utilised as a theoretical framework to identify the facilitators and barriers that influence implementation.<sup>13, 14</sup> This framework, therefore, assists with bridging the gap between research and practice as well as reducing the challenges of implementing these interventions.<sup>15</sup>

To investigate how we can improve implementation and sustainability, we conducted this systematic review to synthesize various factors such as acceptability, settings, and potential adverse effects of interventions that improve oral health and related health behaviours of adults with SMD.

## METHODS

The research protocol was pre-registered and published registered with the Prospective Register of Systematic Reviews (PROSPERO) (reg. no: CRD42020202416).<sup>16, 17</sup> The review was reported according to Preferred Reporting Items for Systematic Reviews and Meta-Analyses (PRISMA) guidelines.<sup>18</sup>

### Search strategy

The search strategy (see Appendix A.) was formulated and conducted with an information specialist within the research team. The following electronic databases: MEDLINE (Ovid), EMBASE (Ovid), CINAHL (Ebsco), APA PsycINFO (Ovid) and Scopus were searched for relevant qualitative, quantitative, and mixed method studies from inception to February 2023. Grey literature searches were conducted using Google Incognito and selected charity organization websites such as Fulfilling Lives, Crisis, Groundswell, which were informed by the expertise of the research team. Forward and backward citation search of the included studies were also conducted.

### Study selection

The search results were downloaded and deduplicated using EndNote 20.4.1 and the uploaded into Covidence, an online tool for managing the whole systematic review process.<sup>19</sup> Title, abstracts and full texts were independently screened by two reviewers. In the case of a discrepancy, consensus was reached after consultation with a third reviewer. Table 1 presents the inclusion criteria used during screening.

Table 1: *Eligibility Criteria used to select the studies*

|                     | <i>Eligibility Criteria</i>                                                                                                                                                                                                                                                                                                                                          |
|---------------------|----------------------------------------------------------------------------------------------------------------------------------------------------------------------------------------------------------------------------------------------------------------------------------------------------------------------------------------------------------------------|
| <i>Population</i>   | Adults aged 18 or above, who experience SMD comprising of either homelessness (rough sleeping or other types of insecure accommodation), repeated offending or frequent substance use that co-occurs with homelessness or repeated offending. <sup>17</sup> Perspectives of staff who work with SMD groups and stakeholders such as policy makers and commissioners. |
| <i>Intervention</i> | Structural, community and individual level interventions. <sup>17</sup>                                                                                                                                                                                                                                                                                              |
| <i>Outcomes</i>     | Views from SMD groups and other stakeholders (policy makers, service providers, voluntary sector etc) about implementation and sustainability of interventions which include acceptability, content, settings, potential harms, uptake, and retention. <sup>17</sup>                                                                                                 |

|                     |                                                     |
|---------------------|-----------------------------------------------------|
|                     |                                                     |
| <i>Study Design</i> | Qualitative, quantitative, and mixed method studies |

### Data extraction and quality appraisal

The data extraction and quality assessment for all the included studies were conducted by one reviewer and cross-checked by a second reviewer. Included studies were critically appraised to guide how much confidences could be placed on the findings. Qualitative studies were appraised using the Critical Appraisal Skills Programme (CASP) qualitative checklist.<sup>20</sup> Quantitative studies were appraised using Cochrane's Risk of bias for randomized control trials (RCTs).<sup>21</sup> For cross-sectional studies the National Institutes of Health (NIH) Study Quality Appraisal Tool was used.<sup>22</sup> Qualitative studies were rated as good, moderate or low quality, which was informed by a scoring system: scores 9–10 was high quality, 7.5–9 was moderate quality and <7.5 was low quality.<sup>23</sup> The scoring were informed by the quality checklists. The studies were not excluded based on their quality, as they all contributed data relevant to this review.<sup>24</sup>

### Data synthesis

Abstracts and data from the results of included studies were uploaded on to NVivo software (QSR International Pty Ltd., Melbourne, Australia Version 12, Release 1.6.1). Narrative synthesis was undertaken. Deductive codes based on the CFIR framework were used to initially code the findings followed by a three-step inductive synthesis process which involved coding the text, identifying the themes, and creating the subthemes. To maximise thematic yield, data reported in different papers but from the same study were individually coded. The developing themes and subthemes were discussed with the other reviewers and consensus was reached regarding these.

## RESULTS

Seventeen articles (twelve individual studies) met the inclusion criteria and were included in this systematic review. Figure 1 presents the PRISMA flowchart for included studies. Table 2 presents the descriptive summaries of the included studies. The papers were published between 1995 and 2022, and were related to interventions targeting oral health,<sup>25-32</sup> substance use,<sup>33-39</sup> smoking and none on diet.



1  
2  
3  
4  
5  
6  
7  
8  
9  
10  
11  
12  
13  
14  
15  
16  
17  
18  
19  
20  
21  
22  
23  
24  
25  
26  
27  
28  
29  
30  
31  
32  
33  
34  
35  
36  
37  
38  
39  
40  
41  
42  
43  
44  
45  
46

Table 2: Descriptive summaries of the seventeen included studies, including quality appraisal (High quality/moderate quality/low quality)

| No. | First Author (Year) and Country                  | Sample Size and Age of the participants      | Participant Group                                                                | Intervention Description                                                                                                                                                                            | Type of Research, Data Collection and Analysis         | Findings of the paper relevant to the review                                                                                                                              | Quality Appraisal/ Risk of Bias |
|-----|--------------------------------------------------|----------------------------------------------|----------------------------------------------------------------------------------|-----------------------------------------------------------------------------------------------------------------------------------------------------------------------------------------------------|--------------------------------------------------------|---------------------------------------------------------------------------------------------------------------------------------------------------------------------------|---------------------------------|
| 1.  | Beaton et al (2016) United Kingdom <sup>25</sup> | N=20, age not mentioned                      | Health and social care workers                                                   | Motivational interviewing to promote oral health among homeless populations ("Smile4life programme")                                                                                                | Qualitative - Telephone interviews, framework approach | Familiarity and good relationships between service providers and third sector organizations facilitated implementation whereas lack of resources and interest hindered it | High quality                    |
| 2.  | Beaton et al (2018) United Kingdom <sup>26</sup> | N= 9 observation sessions, age not mentioned | Oral healthcare workers such as oral health educators and dental support workers | Motivational interviewing and tailored advice to promote oral health among the homeless population at different settings such as mobile dental units and homeless shelters ("Smile4Life programme") | Qualitative- Participant observation, content analysis | Good working relationships between healthcare providers, patients and third sector organizations are important                                                            | Moderate quality                |

| No. | First Author (Year) and Country                            | Sample Size and Age of the participants | Participant Group                                                                    | Intervention Description                                                                                                                | Type of Research, Data Collection and Analysis                                               | Findings of the paper relevant to the review                                                                                                                                       | Quality Appraisal/ Risk of Bias  |
|-----|------------------------------------------------------------|-----------------------------------------|--------------------------------------------------------------------------------------|-----------------------------------------------------------------------------------------------------------------------------------------|----------------------------------------------------------------------------------------------|------------------------------------------------------------------------------------------------------------------------------------------------------------------------------------|----------------------------------|
| 3.  | Beaton et al (2021) United Kingdom <sup>27</sup>           | N= 100, 16- 85 years                    | Oral health practitioners, third sector organization staff and local authority staff | Motivational interviewing and behavioural change techniques to promote oral health among the homeless (" <i>Smile4Life programme</i> ") | Quantitative- Questionnaire, K-R20, Exploratory factor analysis, multivariate path analysis. | Work practices such as positive attitudes and beliefs of the oral healthcare workers influence implementation                                                                      | Moderate/ Fair quality           |
| 4.  | Burnam et al (1995) United States of America <sup>34</sup> | N= 276, mean age = 37 years             | Homeless individuals with co-occurring substance and mental health issues            | Social model of residential and non-residential programs providing integrated substance use and mental health services                  | Quantitative- Structured interviews, regression analyses                                     | Retention levels were higher in the residential program compared to the non-residential one                                                                                        | Low quality (high Risk of Bias ) |
| 5.  | Coles et al (2013) United Kingdom <sup>29</sup>            | N= 14, age not mentioned                | Healthcare workers from statutory and non-statutory organizations                    | A framework that offers tailored oral health advice and signposts to relevant dental services. (" <i>Something To Smile About</i> ")    | Qualitative- Focus groups, content analysis                                                  | Oral health knowledge among the healthcare workers improved but complex needs such as housing, employment etc must be addressed prior to oral health for successful implementation | Moderate quality                 |

| No. | First Author (Year) and Country                                    | Sample Size and Age of the participants                                        | Participant Group                                                                                        | Intervention Description                                                                                                                                                                        | Type of Research, Data Collection and Analysis               | Findings of the paper relevant to the review                                                                                        | Quality Appraisal/ Risk of Bias |
|-----|--------------------------------------------------------------------|--------------------------------------------------------------------------------|----------------------------------------------------------------------------------------------------------|-------------------------------------------------------------------------------------------------------------------------------------------------------------------------------------------------|--------------------------------------------------------------|-------------------------------------------------------------------------------------------------------------------------------------|---------------------------------|
| 6.  | Collins et al (2019) <i>United States of America</i> <sup>35</sup> | N= 168, mean age= 47 years                                                     | Homeless individuals with alcohol use disorder                                                           | Non-abstinence treatment program that involves tracking of alcohol use, discussion of safe drinking practices and goal-oriented tasks. ( <i>"Harm Reduction Treatment for Alcohol HaRT-A"</i> ) | Quantitative- Questionnaires, content analysis               | It was positively viewed by the participants with high levels of retention and satisfaction                                         | Good quality (low ROB)          |
| 7.  | Doughty et al (2020) <i>United Kingdom</i> <sup>31</sup>           | Service users – N= 353, age not mentioned<br>Service providers – not stated    | Homeless individuals and oral healthcare workers such as dentists, dental nurses, dental technicians etc | Denture service provided by Crisis at Christmas Dental Service and Dentech to the homeless and vulnerably housed                                                                                | Qualitative                                                  | Communication, timing, resources, and training were considered as areas that needed to be improved                                  | Low quality                     |
| 8.  | Forchuk et al (2022) <i>Canada</i> <sup>36</sup>                   | Service users – N= 58, mean age = 52.5 years<br>Service providers – not stated | Homeless veterans with substance use problems and staff from housing services                            | Housing provided along with the peer support and harm reduction services to homeless veterans ( <i>"Housing First"</i> )                                                                        | Qualitative - Interviews and focus groups, Thematic analysis | Stable housing with harm reduction services was well received.<br>Collaboration between mental health and addiction services should | Low quality                     |

| No. | First Author (Year) and Country                                      | Sample Size and Age of the participants                                             | Participant Group                                                                                                          | Intervention Description                                                                                                                                                                          | Type of Research, Data Collection and Analysis                       | Findings of the paper relevant to the review                                                                                                            | Quality Appraisal/ Risk of Bias |
|-----|----------------------------------------------------------------------|-------------------------------------------------------------------------------------|----------------------------------------------------------------------------------------------------------------------------|---------------------------------------------------------------------------------------------------------------------------------------------------------------------------------------------------|----------------------------------------------------------------------|---------------------------------------------------------------------------------------------------------------------------------------------------------|---------------------------------|
|     |                                                                      |                                                                                     |                                                                                                                            |                                                                                                                                                                                                   |                                                                      | be considered for future services                                                                                                                       |                                 |
| 9.  | Henderson et al (2004) <i>United States of America</i> <sup>37</sup> | Service users – N = 15<br>Service providers – not mentioned                         | Homeless veterans with substance/alcohol use and program staff such as healthcare workers and administrative staff         | Residential substance use treatment program that focuses on relapse prevention along with education and housing stability for homeless men                                                        | Qualitative - Surveys, direct observation and Interviews, not stated | Majority of the participants provided positive feedback. Staffing issues such as training and competing workload were noted as drawbacks to the program | Moderate quality                |
| 10. | Neale et al (2014) <i>United Kingdom</i> <sup>33</sup>               | Service users - N= 30, 23- 62 years<br>Service providers – N= 15, age not mentioned | Homeless individuals with substance use and mentors such as substance use workers, substance use managers and hostel staff | Computer assisted therapies using 20 different psychosocial intervention strategies to identify and reduce substance use based in hostels and homeless shelters ( <i>"Breaking Free Online"</i> ) | Qualitative- Interviews, Inductive coding and Framework approach     | 'Program features', 'mentor support', 'participant characteristics' and 'delivery context' were noted as factors that lead to successful delivery.      | Moderate quality                |

| No. | First Author (Year) and Country                                  | Sample Size and Age of the participants                                             | Participant Group                                                                         | Intervention Description                                                                                                                                        | Type of Research, Data Collection and Analysis                                              | Findings of the paper relevant to the review                                                                     | Quality Appraisal/ Risk of Bias |
|-----|------------------------------------------------------------------|-------------------------------------------------------------------------------------|-------------------------------------------------------------------------------------------|-----------------------------------------------------------------------------------------------------------------------------------------------------------------|---------------------------------------------------------------------------------------------|------------------------------------------------------------------------------------------------------------------|---------------------------------|
| 11. | Paisi et al (2020) <i>United Kingdom</i> <sup>32</sup>           | Service users – N= 11, 20 -65 years<br>Service providers – N= 11, age not mentioned | Homeless individuals and the dental clinic staff members, support workers and volunteers. | Community dental clinic that provides both regular and emergency treatments.                                                                                    | Qualitative – semi structured interviews, reflective thematic analysis                      | Flexibility and the relationship between the patient and dental provider were highlighted as important features. | High quality                    |
| 12. | Pauly et al (2020) <i>Canada</i> <sup>38</sup>                   | N= 14, 29-61 years                                                                  | Homeless with illicit alcohol use                                                         | Non-residential community managed alcohol program which provides harm reduction strategies and peer support (“ <i>Canadian Managed Alcohol Program Study</i> ”) | Qualitative- Semi-structured interviews, inductive coding and constant comparative analysis | Peer led program was successful as it facilitates capacity building, engagement, and empowerment                 | Moderate quality                |
| 13. | Pratt et al (2019) <i>United States of America</i> <sup>40</sup> | N= 40, 29-69 years                                                                  | Homeless with smoking and alcohol use                                                     | Nicotine replacement therapy and motivational interviewing/cognitive behavioural therapy to reduce smoking and                                                  | Qualitative- Interviews, social constructivist approach to grounded theory                  | Social (peer groups) and environmental (housing etc) factors impact cessation in homeless smokers                | High quality                    |

| No. | First Author (Year) and Country                                  | Sample Size and Age of the participants | Participant Group                           | Intervention Description                                                                                                                                          | Type of Research, Data Collection and Analysis                                               | Findings of the paper relevant to the review                                                                                                                 | Quality Appraisal/ Risk of Bias |
|-----|------------------------------------------------------------------|-----------------------------------------|---------------------------------------------|-------------------------------------------------------------------------------------------------------------------------------------------------------------------|----------------------------------------------------------------------------------------------|--------------------------------------------------------------------------------------------------------------------------------------------------------------|---------------------------------|
|     |                                                                  |                                         |                                             | alcohol use among the homeless ("Power To Quit 2")                                                                                                                |                                                                                              |                                                                                                                                                              |                                 |
| 14. | Pratt et al (2022) <i>United States of America</i> <sup>41</sup> | N= 40, 29-70 years                      | Homeless with smoking and alcohol use       | Nicotine replacement therapy and motivational interviewing/cognitive behavioural therapy to reduce smoking and alcohol use among the homeless ("Power To Quit 2") | Qualitative – Semi structured interviews, social constructivist approach to grounded theory  | Social pressure and shelter environment impact the intervention but the integrated treatment along with emotional support from the staff make it beneficial. | High quality                    |
| 15. | Rash et al (2017) <i>United States of America</i> <sup>39</sup>  | N= 355, mean age = 37 years             | Homeless with substance use                 | Behavioural intervention contingency management with the use of incentives such as vouchers and prizes delivered at local community clinics                       | Quantitative- Adaptation of the Service Utilization Form, Multivariate analysis of variance. | Retention was higher in groups that accessed the intervention compared to the standard arm of care                                                           | Moderate/fair quality           |
| 16. | Rodriguez et al (2019) <i>United Kingdom</i> <sup>28</sup>       | Service users - N= 13, 18- 22 years     | Young homeless people and NGO practitioners | Pedagogical workshops about oral health, mental health, substance misuse, diet etc to increase                                                                    | Qualitative- Unstructured interviews and                                                     | Involvement of young people in co-designing an intervention facilitates engagement,                                                                          | High quality                    |

1  
2  
3  
4  
5  
6  
7  
8  
9  
10  
11  
12  
13  
14  
15  
16  
17  
18  
19  
20  
21  
22  
23  
24  
25  
26  
27  
28  
29  
30  
31  
32  
33  
34  
35  
36  
37  
38  
39  
40  
41  
42  
43  
44  
45  
46

| No. | First Author (Year) and Country              | Sample Size and Age of the participants     | Participant Group                                                                                            | Intervention Description                                                                                                                                                              | Type of Research, Data Collection and Analysis                            | Findings of the paper relevant to the review                                                                                                                      | Quality Appraisal/ Risk of Bias |
|-----|----------------------------------------------|---------------------------------------------|--------------------------------------------------------------------------------------------------------------|---------------------------------------------------------------------------------------------------------------------------------------------------------------------------------------|---------------------------------------------------------------------------|-------------------------------------------------------------------------------------------------------------------------------------------------------------------|---------------------------------|
|     |                                              | Service providers – N= 5, age not mentioned |                                                                                                              | engagement and awareness                                                                                                                                                              | workshops, content analysis                                               | trust building and increases health literacy                                                                                                                      |                                 |
| 17. | Stormon et al (2018) Australia <sup>30</sup> | N= 76, 41-60 years<br>Feedback – N=24       | Disadvantaged adults (clients of community organizations that utilize housing, employment and food services) | Facilitated access pathway between homeless organizations and public dental services. Improving oral health by assessing dental needs, offering dental advice and dental appointments | Quantitative- Questionnaire, Descriptive analysis, and Framework approach | Positive feedback by participants facilitated by the environment, clinical staff and flexibility. Attendance rates varied across the site but was generally high. | Fair/ moderate quality          |

1  
2  
3 SMD groups in the studies found in this review included young adults, single mothers, veterans, and  
4 adults with co-occurring conditions of severe mental illness. Based on the information reported in  
5 the studies, most of the interventions were focused on adults who were experiencing homelessness  
6 and substance use issues,<sup>33-40</sup> but did not explicitly report on whether they included those who had  
7 repeated involvement with the criminal justice system.  
8  
9

### 10 11 12 **Quality appraisal**

13  
14 Of the twelve articles reporting qualitative findings, two were low quality due to lack of detailed  
15 findings and methodology not being reported adequately,<sup>31, 36</sup> five moderate quality,<sup>26, 29, 33, 37, 38</sup> due  
16 to reporting bias and five high quality.<sup>25, 28, 32, 40, 41</sup> The risk of bias was assessed for the five articles  
17 reporting quantitative findings; among the two RCTs: one had a high risk of bias because of attrition  
18 and reporting bias,<sup>34</sup> and the other article had a low risk of bias,<sup>35</sup> the remaining three cross-  
19 sectional studies were of moderate quality.<sup>27, 30, 39</sup>  
20  
21  
22  
23  
24

### 25 26 **Synthesis of qualitative findings**

27 Table 3 presents the themes, subthemes, codes, and quotes from individuals experiencing SMD and  
28 frontline staff and stakeholders.  
29  
30  
31  
32  
33  
34  
35  
36  
37  
38  
39  
40  
41  
42  
43  
44  
45  
46  
47  
48  
49  
50  
51  
52  
53  
54  
55  
56  
57  
58  
59  
60



Table 3: Themes and subthemes from qualitative synthesis of findings along with the relevant codes and quotes

| Themes                | Subthemes                         | Codes                                                                                                           | Quote(s) – people with SMD; or frontline staff                                                                                                                                                                                                                                                                                                                                                                                                                                                                                                                                                                                                                                                                                                                                                                                                                                                                                                                                                                                                                                          |
|-----------------------|-----------------------------------|-----------------------------------------------------------------------------------------------------------------|-----------------------------------------------------------------------------------------------------------------------------------------------------------------------------------------------------------------------------------------------------------------------------------------------------------------------------------------------------------------------------------------------------------------------------------------------------------------------------------------------------------------------------------------------------------------------------------------------------------------------------------------------------------------------------------------------------------------------------------------------------------------------------------------------------------------------------------------------------------------------------------------------------------------------------------------------------------------------------------------------------------------------------------------------------------------------------------------|
| Intervention settings | Physical settings                 | Housing stability, privacy, confidentiality                                                                     | <p><i>“This is kind of a stressful situation. People are homeless, being at the bottom of their luck, and—boom—and everything. So this is stress. What do you do? You drink, and you smoke, and that’s all that you can do, walking around here all day. Do you understand?”(person with SMD) <sup>40</sup></i></p> <p><i>“But at the same time the addictions piece, especially in terms of stability, I’ve noticed a lot of the guys that because they are stable in our home, they may make the choice more often to say ‘I don’t feel like drinking tonight,’ so they don’t. They don’t have to get intoxicated to go to sleep in a shelter on a mat, they can choose not to drink and sometimes they do make that choice not to drink and just watch TV for the evening.”(frontline staff) <sup>36</sup></i></p> <p><i>“If you went in and tried to do anything, people were behind you, over your shoulder, ‘what are you doing there’ And, you know, I didn’t what to discuss with people what I was doing, because they’d take the mick”(person with SMD) <sup>33</sup></i></p> |
|                       | Psychological aspects of settings | Communication, trust building, familiarity, mentorship, community, peer pressure, guidance, support, safe space | <p><i>“It’s not just about dental treatment, I think for a lot of people there is the fear of the dentist because when they do go, it’s because they need work done and they’re in pain, therefore they associate pain with the dentist.”(frontline staff) <sup>29</sup></i></p>                                                                                                                                                                                                                                                                                                                                                                                                                                                                                                                                                                                                                                                                                                                                                                                                        |

| Themes | Subthemes     | Codes                              | Quote(s) – people with SMD; or frontline staff                                                                                                                                                                                                                                                                                                                                                                                                                                                                                                                                                                                                                                                                                                                                                                                                                                                                                                                                                                                                                                                                                                                                                                                                                                                                     |
|--------|---------------|------------------------------------|--------------------------------------------------------------------------------------------------------------------------------------------------------------------------------------------------------------------------------------------------------------------------------------------------------------------------------------------------------------------------------------------------------------------------------------------------------------------------------------------------------------------------------------------------------------------------------------------------------------------------------------------------------------------------------------------------------------------------------------------------------------------------------------------------------------------------------------------------------------------------------------------------------------------------------------------------------------------------------------------------------------------------------------------------------------------------------------------------------------------------------------------------------------------------------------------------------------------------------------------------------------------------------------------------------------------|
|        |               |                                    | <p><i>“She’s not somebody that normally expresses much in a group, she’s quite a private person, so I thought it took quite a lot for her to open up, to trust, but I also appreciate the fact that she felt she was in a really good space that she could share that experience with the others and I felt that was really valuable for the rest of the group to hear that. I think this activity [the workshops] encourages people to talk about their own experiences”(frontline staff)<sup>28</sup></i></p> <p><i>“Yes. A lot better off because... I’m not like, like when I’m here and I’m here with people that are drinking on programs like this and stuff like that I’ve noticed we’re all on the same level. We don’t care about the issues or problems, we just, you know, pitch together and do what we gotta do to get ourselves fixed and then from there if we can help other people, and people help other people...”(person with SMD) <sup>38</sup></i></p> <p><i>“If there is nobody there and you’re just left to get on with it, it’s quite easy to skip things...I will just put that answer down, you know. But then when you know somebody is there and they are there for that specific reason, then it’s a lot easier to go through with things.”(person with SMD) <sup>33</sup></i></p> |
|        | Accessibility | Point of contact, space, geography | <p><i>“We were put in the medical room along the corridor from the office, but there was no opportunity for practitioner 4 to approach any of the</i></p>                                                                                                                                                                                                                                                                                                                                                                                                                                                                                                                                                                                                                                                                                                                                                                                                                                                                                                                                                                                                                                                                                                                                                          |

1  
2  
3  
4  
5  
6  
7  
8  
9  
10  
11  
12  
13  
14  
15  
16  
17  
18  
19  
20  
21  
22  
23  
24  
25  
26  
27  
28  
29  
30  
31  
32  
33  
34  
35  
36  
37  
38  
39  
40  
41  
42  
43  
44  
45  
46

| Themes                | Subthemes          | Codes                                                            | Quote(s) – people with SMD; or frontline staff                                                                                                                                                                                                                                                                                                                                                                                                                                                                                                                                                                             |
|-----------------------|--------------------|------------------------------------------------------------------|----------------------------------------------------------------------------------------------------------------------------------------------------------------------------------------------------------------------------------------------------------------------------------------------------------------------------------------------------------------------------------------------------------------------------------------------------------------------------------------------------------------------------------------------------------------------------------------------------------------------------|
|                       |                    |                                                                  | <p><i>residents. We only saw service users if they specifically wanted to talk about their oral health or if they had walker past the room and wanted to see who we were.” (frontline staff) <sup>26</sup></i></p> <p><i>“I’m from a very rural area, and we don’t really have any homelessness centres.” (person with SMD) <sup>25</sup></i></p>                                                                                                                                                                                                                                                                          |
| Intervention delivery | Improved Awareness | Understandable, ideas, learning from one and another             | <p><i>“Take things that people say and take it on board, and everything’s a learning curve, you learn things all the time... And I’d recommend that to anybody else who is homeless, just listen to other people, take on board what they’ve got to say, and accept the help that’s around you like the group activity [the workshops]”.(person with SMD) <sup>28</sup></i></p> <p><i>“Especially when it was to do with what alcohol can do and what substances can do, I don’t think they realized how that affects their oral health, their ears pricked up when you said that” (frontline staff) <sup>29</sup></i></p> |
|                       | Resources          | Workloads, stress, competing needs, volunteers, equipment, funds | <p><i>“I think he [client] felt that maybe I would have to sit with him again and, I don’t know, maybe I should have sat him down and had a talk with him and I just haven’t been able to”(frontline staff) <sup>33</sup></i></p> <p><i>“You feel like you’re spinning so many plates, that you just can’t possibly keep them all up in the air” (frontline staff) <sup>25</sup></i></p>                                                                                                                                                                                                                                   |

| Themes                                       | Subthemes                                                  | Codes                                                                                                            | Quote(s) – people with SMD; or frontline staff                                                                                                                                                                                                                                                                                                                                                                                                                                           |
|----------------------------------------------|------------------------------------------------------------|------------------------------------------------------------------------------------------------------------------|------------------------------------------------------------------------------------------------------------------------------------------------------------------------------------------------------------------------------------------------------------------------------------------------------------------------------------------------------------------------------------------------------------------------------------------------------------------------------------------|
|                                              |                                                            |                                                                                                                  | <p><i>“we need to attract funding ... it's very difficult to encourage NHS England to commission outside of their routine, the existing contract doesn't favour patients with high treatment needs so we would need them to step outside of their comfort zone and commission something slightly different to what they're used to”(frontline staff) <sup>32</sup></i></p>                                                                                                               |
|                                              | Perceived risks while working with a vulnerable population | Safety, unpredictable, inappropriate behavior, challenges, relevant experience, confident, challenging behaviors | <p><i>“Practitioner 1 is confident and appears quite fearless, putting up with language/behaviour that would not be tolerated in a normal clinic.” (researcher observation notes of frontline staff) <sup>26</sup></i></p> <p><i>“Initially we were thinking ‘oh we need to make sure that we’re not alone in the surgery at any point’, and we had a panic alarm and things, we still have all that in place, but it’s actually been fine.”(frontline staff) <sup>32</sup></i></p>      |
| Ways to enhance engagement and participation | Interest and motivation                                    | Complexity, fears, initiative, specific and complex needs, mixed opinions                                        | <p><i>“[Mentor] came in and said ‘I'm going home, have you done much?’ And I said, ‘I couldn't get back on, you know’. And she just took it [the laptop]. I don't know if she was fed up with me or whatever, but she never spoke about it again and I never mentioned it again.”(person with SMD) <sup>33</sup></i></p> <p><i>“The oral health team do not seem bothered to recruit any patients, even if that means sitting waiting with nothing to do—the feeling seems to be</i></p> |

1  
2  
3  
4  
5  
6  
7  
8  
9  
10  
11  
12  
13  
14  
15  
16  
17  
18  
19  
20  
21  
22  
23  
24  
25  
26  
27  
28  
29  
30  
31  
32  
33  
34  
35  
36  
37  
38  
39  
40  
41  
42  
43  
44  
45  
46

| Themes | Subthemes                       | Codes                                                               | Quote(s) – people with SMD; or frontline staff                                                                                                                                                                                                                                                                                                                                                                                                                                                                                                                                                                                                                                              |
|--------|---------------------------------|---------------------------------------------------------------------|---------------------------------------------------------------------------------------------------------------------------------------------------------------------------------------------------------------------------------------------------------------------------------------------------------------------------------------------------------------------------------------------------------------------------------------------------------------------------------------------------------------------------------------------------------------------------------------------------------------------------------------------------------------------------------------------|
|        |                                 |                                                                     | <p><i>that if a patient wants to be seen then they will come to the MDU.”(researcher observation notes of frontline staff) <sup>26</sup></i></p> <p><i>“My goal is to quit within a month or two months. I talked to a couple of people. ‘It ain’t going to happen.’ I said, ‘well if you set your mind to certain things, you can do this.”(person with SMD) <sup>40</sup></i></p> <p><i>“I think it’s good. It made me feel like I had something to do or like I had a purpose. You know what I mean, not a purpose but it wasn’t like the homeless”<sup>41</sup></i></p>                                                                                                                 |
|        | Adapt to specific circumstances | Context, tailored to the needs of the individual, personalized care | <p><i>“People getting through the door, they might not have a roof, might not have any money, might have major drug and alcohol issues, might be threatened with violence, the last thing they want to talk about is their teeth.”(frontline staff) <sup>29</sup></i></p> <p><i>“we call these people chaotic and that’s a bit judgmental, they are actually setting priorities, they’ve got so much going on in their lives that it [oral health] just falls of their list of priorities, they’re saying ‘it’s my priority to find somewhere to sleep tonight’ ... The time that you catch people’ was therefore identified as ‘really important’.”(frontline staff) <sup>32</sup></i></p> |

| Themes | Subthemes        | Codes                           | Quote(s) – people with SMD; or frontline staff                                                                                                                                                                                                                                                                                                                                                                                                                                                                                                                                                                                                           |
|--------|------------------|---------------------------------|----------------------------------------------------------------------------------------------------------------------------------------------------------------------------------------------------------------------------------------------------------------------------------------------------------------------------------------------------------------------------------------------------------------------------------------------------------------------------------------------------------------------------------------------------------------------------------------------------------------------------------------------------------|
|        | Constant support | Long term care, advice, support | <p><i>“About three or four in the morning and I feel like upset then...I can come down and use the program, which is quite good because that way I can put stuff that is all jumbled up in my head down in a way that makes sense and it kind of makes you see that things aren't quite so bad as they seem.”(person with SMD) <sup>33</sup></i></p> <p><i>“At the stage of having goals, an action plan and were working through that . . . but for some homeless people who are nowhere ready, you can make an average of seven appointments before they will turn up once, it's just where your client is at.”(frontline staff) <sup>29</sup></i></p> |

1  
2  
3 Synthesis of twelve papers with qualitative findings,<sup>25, 26, 28, 29, 31-33, 36-38, 40, 41</sup> identified three  
4 overarching themes in relation to the aims of this review. The three themes are: 1) Intervention  
5 settings, 2) Intervention delivery and 3) ways to enhance engagement and participation.  
6  
7

### 8 9 **Theme 1: Intervention settings**

10  
11 Eleven papers identified issues related to the settings of interventions which can play a role in the  
12 delivery of interventions targeting oral health, substance use and smoking.<sup>25-28, 32, 33, 36-38, 40, 41</sup>

#### 13 14 *Physical settings*

15  
16 Physical settings involved the environment in which the intervention took place. The wider physical  
17 environment has been found to have an impact on the intervention experience,<sup>41</sup> with privacy being  
18 the key factor for improving physical settings.<sup>32, 33, 41</sup> Communal homeless shelters and busy teaching  
19 hospitals lack the space and privacy to deliver interventions involving discussions about difficult and  
20 sensitive topics.<sup>32, 33, 41</sup> Contrastingly, stable housing with the necessary privacy allowed people  
21 experiencing SMD to focus on their recovery journey, whilst also creating a space in which residents  
22 could spend time away from peers who were sometimes perceived as having a negative peer group  
23 influence.<sup>36, 40</sup>

#### 24 25 *Psychological aspects of settings*

26  
27 Psychological aspects related to the less visible parts of the interventions were identified across ten  
28 papers.<sup>25, 26, 28, 29, 32, 33, 37, 38, 40, 41</sup> Firstly, it was reported that relationships between people  
29 experiencing SMD and service providers played a vital part in the delivery of interventions. Through  
30 good communication,<sup>26, 28, 32, 41</sup> trust building,<sup>28, 29, 32, 41</sup> familiarity of working with a vulnerable  
31 population,<sup>25, 32</sup> and mentorship,<sup>33, 37</sup> interventions were able to form a 'safe and respectable  
32 environment'.<sup>28, 32, 37, 41</sup> Secondly, papers discussed the importance of peer support as a way of  
33 increasing the effectiveness of interventions.<sup>32, 37, 38</sup> There were also reports of the impact negative  
34 peer influence could have on the recovery process. For example, smoking and drinking were linked  
35 to socializing with others, which could increase the urge to smoke or drink.<sup>40, 41</sup>

#### 36 37 *Accessibility*

38  
39 Accessibility of interventions was one of the factors found to be important related to  
40 implementation of interventions among people experiencing SMD.<sup>25, 26, 32, 41</sup> Firstly, accessible and  
41 spacious meeting points within the services were reported to help with their participation in the  
42 intervention, especially in the case of oral health interventions that were delivered either in a  
43 community setup (open space) or a mobile dental van.<sup>26</sup> Secondly, geographical proximity could act  
44  
45  
46  
47  
48  
49  
50  
51  
52  
53  
54  
55  
56  
57  
58  
59  
60

1  
2  
3 as a barrier as rural and remote areas lack the facilities and resources, which could influence the  
4 access of people experiencing SMD.<sup>25, 32</sup> Lastly, it was reported that access could become an issue  
5 when service users move to more stable housing as weather conditions, distance, work and other  
6 appointments tend to make it challenging to attend the intervention sessions.<sup>41</sup>  
7  
8  
9

## 10 **Theme 2: Intervention delivery**

11  
12  
13 Nine papers discussed aspects such as information availability, resources and perceived risks of  
14 working with a vulnerable population that could be important for roll out and delivery of  
15 interventions addressing oral health, smoking and substance use.<sup>25, 26, 28, 29, 31-33, 37, 41</sup>  
16  
17

### 18 *Improved Awareness*

19  
20  
21 Awareness and information availability were discussed in papers focusing on improving oral health,  
22 smoking and alcohol use.<sup>28, 29, 32, 41</sup> Sharing information between service providers and SMD groups  
23 was identified as an important issue across the papers as it created opportunities to promote  
24 involvement and behavior change.<sup>28, 29, 41</sup> It was reported that easily understandable information  
25 encouraged people experiencing SMD to view healthier behaviors as important (e.g. tooth brushing)  
26 and helped to signpost them to necessary services.<sup>28, 41</sup> Clear and simple explanations of treatment  
27 options available was seen to help them in decision-making.<sup>32</sup> Service providers also felt that they  
28 learned more about healthy behaviors and were able to pass their newly gained knowledge to their  
29 clients.<sup>29</sup>  
30  
31  
32  
33  
34  
35

### 36 *Resources*

37  
38  
39 Five papers discussed the importance of having necessary resources to enable interventions to run  
40 efficiently and effectively.<sup>25, 31-33, 37</sup> The majority of these highlighted the importance of distribution  
41 of workloads among staff because of difficulties in implementing interventions with competing  
42 duties and work within the organizations.<sup>25, 33, 37</sup> Funding and resources such as volunteers and  
43 materials were identified in oral health interventions as an important issue that impacts  
44 implementation and long-term sustainability.<sup>31, 32</sup>  
45  
46  
47  
48  
49

### 50 *Perceived risks working with a vulnerable population*

51  
52 Papers reported on the perceived risks of delivering interventions to vulnerable populations as  
53 challenging at times by service providers.<sup>25, 26, 32</sup> There were concerns about safety of service  
54 providers while interacting with clients who were seen to be “unpredictable”. The need for training  
55 and being better equipped to work in this environment and setting boundaries between service  
56 providers and clients was repeatedly mentioned by service providers.<sup>25, 26, 32, 37</sup> The papers also  
57  
58  
59  
60



1  
2  
3 highlighted the importance of training opportunities that provide service providers with the  
4 necessary skills to handle volatile and difficult situations.<sup>25, 37</sup>  
5  
6

### 7 **Theme 3: Ways to enhance participation and engagement**

8

9 Ten papers identified factors such as interest and motivation levels, adaptability, and long-term  
10 support that could help to improve outcomes and create sustainable interventions by enhancing  
11 engagement and participation.<sup>25, 26, 28, 29, 31-33, 37, 40, 41</sup>  
12  
13

#### 14 *Interest and motivation*

15

16  
17 Nine papers highlighted that the interest and motivation levels of both staff supporting SMD groups  
18 and people experiencing SMD play an important role in the implementation of interventions.  
19 Disinterest was sometimes observed amongst service providers, due to concerns about the  
20 complexity of delivering the intervention,<sup>25, 29, 31</sup> lack of engagement with third sector  
21 organizations,<sup>26</sup> poor uptake of the intervention by the target populations,<sup>25, 29, 31</sup> and preconceived  
22 notions of improper behaviour by SMD groups.<sup>41</sup> Interestingly, interventions were met with similar  
23 feelings of indifference by people experiencing SMD if the intervention did not address their specific  
24 and complex needs such as housing and financial problems.<sup>25, 26, 32</sup> Two papers on oral health  
25 interventions found that younger adults and families with children were more eager to engage  
26 compared to single men.<sup>28, 29</sup> Papers discussing the same smoking intervention illustrated that an  
27 awareness of health benefits and risks played a part in motivating people in engaging with the  
28 intervention.<sup>40, 41</sup>  
29  
30  
31  
32  
33  
34  
35  
36  
37

#### 38 *Adapting to specific circumstances*

39

40 Adaptability of interventions was noted as an essential feature among four papers.<sup>29, 32, 33, 40</sup> Tailoring  
41 the interventions to address their specific needs at the time such as housing and employment was  
42 noted to increase participation and better outcomes.<sup>29, 40</sup> Service users of a community dental  
43 service also suggested flexible and longer dental appointments would be helpful and in the long-  
44 term these adaptations would help reduce missed appointments.<sup>32</sup> Another paper reported that  
45 people experiencing SMD were keen to have more face to face interactions rather than digital,  
46 which highlights the drive to more personalized care.<sup>33</sup>  
47  
48  
49  
50  
51  
52

#### 53 *Long term support*

54

55 Four papers identified sustained and long-term support as a factor that could contribute towards  
56 better intervention outcomes.<sup>29, 32, 33, 37</sup> Service providers expressed a need for interventions which  
57 allowed people experiencing SMD to continue with services/programmes despite missing  
58  
59  
60

1  
2  
3 appointments or not completing treatment within the required delivery timeframe especially  
4 because of the transitional nature of SMD groups.<sup>32, 33</sup> Similarly, for a substance reduction  
5 intervention, a preference for a long-term intervention, that allowed and supported them to  
6 gradually integrate into their new stage of their lives.<sup>33, 37</sup> Two papers on oral health interventions  
7 suggested that drop-in services offered flexibility in seeking advice or seeing a practitioner and  
8 helped to reduce anxiety surrounding accessing treatment for dental health.<sup>29, 32</sup>  
9

### 14 **Synthesis of quantitative findings related to retention and implementation**

16 Four papers reported quantitative findings on retention and program attendance,<sup>30, 34, 35, 39</sup> as  
17 indicators of uptake and sustained implementation of interventions.  
18

20 Three papers on substance use interventions reported high levels of retention in their intervention  
21 groups.<sup>34, 35, 39</sup> One paper found that retention was not significantly associated to housing but to the  
22 type of treatment received at the intervention (e.g. contingency management vs. standard care).<sup>39</sup>  
23 Contrastingly, another intervention delivered in both residential and non-residential settings  
24 reported that retention was greater in the residential program (24/7 program) compared to the non-  
25 residential program (5 days/ week from 1 to 9pm).<sup>34</sup>  
26

31 There was no difference in the attendance levels in the studies related to substance use  
32 interventions.<sup>34, 35</sup> The attendance level for an oral health promotion intervention delivered in  
33 community settings was high (85%), however it varied across community centers and was  
34 dependent on timing of appointment and dental treatments offered. More non-attendance seen for  
35 afternoon appointments and complex dental treatments (e.g. surgical and prosthodontic  
36 treatments).<sup>30</sup>  
37

41 Additionally, workplace beliefs and practices amongst service providers such as knowledge,  
42 intention and goals, were reported to influence implementation behaviors.<sup>27</sup>  
43

### 46 **DISCUSSION**

48 This review synthesized different factors that could influence the implementation and sustainability  
49 of interventions related to improving oral health and related health behaviors of people  
50 experiencing SMD. Evidence suggested that psychological aspects of intervention settings such as  
51 building trust and communication form an integral part in the creating a safe environment and that  
52 these are just as essential as the structural components of settings such as physical environment.  
53 Review findings further suggest that adequate staff capacity, funding and equipment would ease the  
54 delivery of interventions by reducing the immense pressure faced by service providers supporting  
55 the interventions. It was also suggested that implementation is dependent on the interest and  
56  
57  
58  
59  
60

1  
2  
3 motivation of not only people experiencing SMD but also on that of service providers in delivering  
4 difficult and complex interventions.  
5

6  
7 Most of the included studies were related to oral health and substance use (drug and alcohol). There  
8 was a lack of evidence on diet and smoking interventions among this population. Previous evidence  
9 has shown that tobacco use and poor diet, often due to limited choice available while experiencing  
10 homelessness and related disadvantages, result in a range of adverse short term (nutritional  
11 deficiencies) and long term health outcomes (cancer, diabetes, heart disease).<sup>42-44</sup> Food insecurity is  
12 often linked to elevated tobacco use, mental health issues and an increased risk of substance  
13 misuse.<sup>45-47</sup>  
14  
15  
16  
17  
18

19 While most of the papers mainly focused on the perspectives of people experiencing SMD, the  
20 limited data from service providers brought to light some of the challenges faced during  
21 implementation. This supports the notion that intervention implementation needs the co-ordination  
22 and collective effort of everyone involved. All the interventions included were designed focussing on  
23 service provision,<sup>25-28, 30-35, 37-41, 48</sup> except for one study which focussed on an training intervention for  
24 service providers <sup>29</sup>. Limited evidence was available on the long-term sustainability of interventions,  
25 which highlights another evidence gap that needs to be addressed.  
26  
27  
28  
29  
30  
31

32 Our review findings suggest that the retention in interventions may depend on the type of treatment  
33 offered, which at times can be influenced by the availability of housing provision. Timing and type of  
34 treatment may also influence attendance rates; for instance, morning appointments might be more  
35 beneficial, especially for individuals struggling with alcohol addiction, as they may be less intoxicated  
36 compared to later in the day. The findings we have are very limited regarding retention and  
37 attendance, more effort needs to be taken to understand how to improve reach and retention  
38 among SMD groups so that they can access and use the interventions efficiently.  
39  
40  
41  
42  
43

44 A systematic review on access to dental care among individual experiencing homelessness in the UK  
45 identified similar findings around awareness, accessibility and organizational issues (lack of financial  
46 resources and collaboration between sectors) being important toward implementation.<sup>49</sup> This was  
47 also similarly identified in another review on smoking cessation among homeless populations in  
48 high-income countries.<sup>50</sup> The importance of continued engagement in services was highlighted in a  
49 review on substance use support for young people (ages 12 to 24) experiencing homelessness,  
50 which was also reflected in our findings.<sup>51</sup> Existing literature on interventions targeting health  
51 conditions such as HIV and Hepatitis C in this population have shown that improved health outcomes  
52 are linked to increased awareness, establishment of positive relationships with service providers and  
53 integrated treatment involving other health behaviours.<sup>52-54</sup>  
54  
55  
56  
57  
58  
59  
60

1  
2  
3 Some findings from our review on aspects related to intervention settings, and intervention delivery  
4 aligned with CFIR constructs of Inner and Outer settings domains.<sup>14</sup> Subthemes in our findings on  
5 ways to enhance engagement, aligns with both Individuals and Implementation process domains.<sup>14</sup>  
6  
7 The use of CFIR framework helps us understand the impact of intervention settings, delivery  
8 methods and engagement on the implementation process. It also provides a comprehensive  
9 approach for guiding the development of interventions targeting SMD groups and improving their  
10 efficacy in practical settings.  
11  
12  
13  
14

### 15 **Strengths and Limitations**

16  
17 This systematic review is novel in that it assesses the implementation and sustainability of  
18 interventions on oral health together with co-occurring and related health behaviors in people  
19 experiencing SMD. It addresses an evidence gap on interventions targeting these health challenges  
20 and identifies ways to overcome implementation issues faced by these specific interventions.  
21 Another strength of this review lies in its comprehensive search strategy and use of a published tool  
22 (i.e. CFIR) to make sense of the results. It also highlights gaps in the evidence base on interventions  
23 related to diet, as well as studies that include repeat offenders. However, the confidence in the  
24 evidence from this review is limited as most of the papers were of moderate quality. Studies lacked  
25 detailed data collection methods and standardized evaluations which influenced their quality.  
26 Another limitation of this work is that intersectionality was considered explicitly during the analysis  
27 of the data. Furthermore, the findings may not be generalizable to all contexts since the included  
28 papers were from high-income countries.  
29  
30  
31  
32  
33  
34  
35  
36  
37  
38

### 39 **Implications**

40  
41 These findings offer valuable insights for enhancing existing interventions by paying attention to  
42 settings, delivery, and engagement opportunities. Evidence from this review points to the need for  
43 additional research on interventions targeting smoking and diet. These areas hold significant value  
44 due to their direct links with general and oral health. It is also important for interventions to address  
45 not only individual behaviours but also overlapping behaviours of substance use, smoking and poor  
46 diet. This could help reduce the strain on resources and improve engagement. Furthermore, higher  
47 quality research that focuses more on sustainability and intersectionality is warranted to further  
48 investigate and refine interventions focused on SMD groups.  
49  
50  
51  
52  
53  
54  
55  
56  
57  
58  
59  
60

### Author Contributions

Conceptualization: SER, EK, EAA, CB, RGW, ECJ, LJM, FB, DC, DL, MP, FFS; methodology: SER, DAJ, LJM, EAA, ECJ, CR, EK, DC, FB; draft preparation: SER, DAJ, EAA; writing - review and editing all; funding acquisition: SER, EK, FB, CB, RGW, DC, DL, MP, FFS.

### Ethical approval

None sought.

### Data Availability Statement

No data are available.

### Patient and public involvement

Patients and/or the public were not involved in the design, or conduct, or reporting, or dissemination plans of this research.

### Funding Statement

This project is funded by the National Institute for Health and Care Research (NIHR) Policy Research Programme (NIHR200415). EAA was supported by the National Institute for Health and Care Research (NIHR) School for Public Health Research (SPHR) Pre-doctoral Fellowship, Grant Reference Number PD-SPH-2015. EK is supported by an NIHR Senior Investigator award and directs the NIHR funded Applied Research Collaboration North East and North Cumbria. The views expressed are those of the author(s) and not necessarily those of NIHR or the Department of Health & Social Care.

### Conflicts of Interest

The authors declare no conflict of interest. The funders had no role in the design of the study; in the collection, analyses, or interpretation of data; in the writing of the manuscript, or in the decision to publish the results.

### Word Count

3329 words

### References:

1. Bramley G, Fitzpatrick S, Edwards J, Ford D, Johnsen S, Sosenko F, et al. Hard edges: mapping severe and multiple disadvantage in England. 2015.

- 1
- 2
- 3
- 4 2. Sandu RD. Defining severe and multiple disadvantage from the inside: Perspectives
- 5 of young people and of their support workers. *Journal of Community Psychology*. 2021;
- 6 49:1470-86.
- 7 3. Rae BE, Rees S. The perceptions of homeless people regarding their healthcare needs
- 8 and experiences of receiving health care. *Journal of Advanced Nursing*. 2015; 71:2096-107.
- 9 4. Conte M, Broder HL, Jenkins G, Reed R, Janal MN. Oral Health, Related Behaviors and
- 10 Oral Health Impacts Among Homeless Adults. *J Public Health Dent*. 2006; 66:276-8.
- 11 5. Hertzberg D, Boobis S. Unhealthy State of Homelessness 2022: Findings from the
- 12 Homeless Health Needs Audit. 2022.
- 13 6. Groundswell. *Healthy Mouths: A peer-led health audit on the oral health of people*
- 14 *experiencing homelessness*. London Groundswell2017.
- 15 7. Evans NS, Dowler EA. Food, health and eating among single homeless and
- 16 marginalized people in London. *Journal of Human Nutrition and Dietetics*. 1999; 12:179-99.
- 17 8. Sheiham A. Oral health, general health and quality of life. *SciELO Public Health*; 2005.
- 18 p. 644-.
- 19 9. Wiecha JL, Dwyer JT, Dunn-Strohecker M. Nutrition and health services needs among
- 20 the homeless. *Public Health Rep*. 1991; 106:364-74.
- 21 10. Beaton L, Humphris G, Rodriguez A, Freeman R. Community-based oral health
- 22 interventions for people experiencing homelessness: a scoping review. *Community Dent*
- 23 *Health*. 2020; 37:150-60.
- 24 11. Hwang SW, Tolomiczenko G, Kouyoumdjian FG, Garner RE. Interventions to improve
- 25 the health of the homeless: a systematic review. *American journal of preventive medicine*.
- 26 2005; 29:311-. e75.
- 27 12. Speirs V, Johnson M, Jirojwong S. A systematic review of interventions for homeless
- 28 women. *Journal of Clinical Nursing*. 2013; 22:1080-93.
- 29 13. Damschroder LJ, Aron DC, Keith RE, Kirsh SR, Alexander JA, Lowery JC. Fostering
- 30 implementation of health services research findings into practice: a consolidated framework
- 31 for advancing implementation science. *Implementation Science*. 2009; 4:50.
- 32 14. Damschroder LJ, Reardon CM, Widerquist MAO, Lowery J. The updated Consolidated
- 33 Framework for Implementation Research based on user feedback. *Implementation Science*.
- 34 2022; 17:75.
- 35 15. Shelton RC, Cooper BR, Stirman SW. The Sustainability of Evidence-Based
- 36 Interventions and Practices in Public Health and Health Care. *Annual Review of Public*
- 37 *Health*. 2018; 39:55-76.
- 38 16. McGowan L, Joyes E, Adams E, Richmond C, Shabaninejad H, Beyer F, et al.
- 39 Systematic review of oral health and related health behaviour interventions in adults with
- 40 severe and multiple disadvantages. PROSPERO. 2020.
- 41 17. McGowan LJ, Joyes EC, Adams EA, Coyte A, Gavin R, Richmond C, et al. Investigating
- 42 the Effectiveness and Acceptability of Oral Health and Related Health Behaviour
- 43 Interventions in Adults with Severe and Multiple Disadvantage: Protocol for a Mixed-
- 44 Methods Systematic Review. *Int J Environ Res Public Health*. 2021; 18.
- 45 18. Page MJ, Moher D, Bossuyt PM, Boutron I, Hoffmann TC, Mulrow CD, et al. PRISMA
- 46 2020 explanation and elaboration: updated guidance and exemplars for reporting
- 47 systematic reviews. *BMJ*. 2021; 372:n160.
- 48 19. Covidence. Covidence Systematic Review Software.
- 49 20. Programme. CAS. CASP Qualitative Checklist. 2022 [13/03/2023]; Available from:
- 50 <https://casp-uk.net/casp-tools-checklists>.
- 51
- 52
- 53
- 54
- 55
- 56
- 57
- 58
- 59
- 60

- 1
  - 2
  - 3
  - 4
  - 5
  - 6
  - 7
  - 8
  - 9
  - 10
  - 11
  - 12
  - 13
  - 14
  - 15
  - 16
  - 17
  - 18
  - 19
  - 20
  - 21
  - 22
  - 23
  - 24
  - 25
  - 26
  - 27
  - 28
  - 29
  - 30
  - 31
  - 32
  - 33
  - 34
  - 35
  - 36
  - 37
  - 38
  - 39
  - 40
  - 41
  - 42
  - 43
  - 44
  - 45
  - 46
  - 47
  - 48
  - 49
  - 50
  - 51
  - 52
  - 53
  - 54
  - 55
  - 56
  - 57
  - 58
  - 59
  - 60
21. Higgins JP, Thomas J, Chandler J, Cumpston M, Li T, Page MJ, et al. Cochrane handbook for systematic reviews of interventions: John Wiley & Sons; 2019.
22. National Heart LaBl. Study quality assessment tool for observational and cross sectional studies. 2021; Available from: <https://www.nhlbi.nih.gov/health-topics/study-quality-assessment-tools>.
23. Butler A, Hall H, Copnell B. A Guide to Writing a Qualitative Systematic Review Protocol to Enhance Evidence-Based Practice in Nursing and Health Care. *Worldviews Evid Based Nurs*. 2016; 13:241-9.
24. Saini M, Shlonsky A. *Systematic synthesis of qualitative research*: OUP USA; 2012.
25. Beaton L, Freeman R. Oral health promotion and homelessness: A theory-based approach to understanding processes of implementation and adoption. *Health Education Journal*. 2016; 75:184-97.
26. Beaton L, Anderson I, Humphris G, Rodriguez A, Freeman R. Implementing an Oral Health Intervention for People Experiencing Homelessness in Scotland: A Participant Observation Study. *Dent J (Basel)*. 2018; 6.
27. Beaton L, Humphris G, Rodriguez A, Freeman R. Implementing the Smile4life intervention for people experiencing homelessness: a path analytical evaluation. *BMC Oral Health*. 2021; 21:383.
28. Rodriguez A, Beaton L, Freeman R. Strengthening Social Interactions and Constructing New Oral Health and Health Knowledge: The Co-design, Implementation and Evaluation of A Pedagogical Workshop Program with and for Homeless Young People. *Dent J (Basel)*. 2019; 7.
29. Coles E, Watt C, Freeman R. 'Something to Smile About': An evaluation of a capacity-building oral health intervention for staff working with homeless people. *Health Education Journal*. 2012; 72:146-55.
30. Stormon N, Pradhan A, McAuliffe A, Ford P. Does a facilitated pathway improve access to dental services for homeless and disadvantaged adults? *Evaluation and program planning*. 2018; 71:46-50.
31. Doughty J, Johnson A, Tatari A, Kothari C, Patel R, Newman A, et al. A pilot denture service collaboration between Den-Tech denture charity and Crisis at Christmas Dental Service (CCDS): A Plan-Do-Study-Act analysis. *British Dental Journal*. 2020; 228:183-90.
32. Paisi M, Baines R, Worle C, Withers L, Witton R. Evaluation of a community dental clinic providing care to people experiencing homelessness: A mixed methods approach. *Health Expectations*. 2020; 23:1289-99.
33. Neale J, Stevenson C. Positive and negative features of a computer assisted drug treatment program delivered by mentors to homeless drug users living in hostels. *Journal of substance abuse treatment*. 2014; 47:258-64.
34. Burnam MA, Morton SC, McGlynn EA, Petersen LP, Stecher BM, Hayes C, et al. An experimental evaluation of residential and nonresidential treatment for dually diagnosed homeless adults. *J Addict Dis*. 1995; 14:111-34.
35. Collins SE, Clifasefi SL, Nelson LA, Stanton J, Goldstein SC, Taylor EM, et al. Randomized controlled trial of harm reduction treatment for alcohol (HaRT-A) for people experiencing homelessness and alcohol use disorder. *Int J Drug Policy*. 2019; 67:24-33.
36. Forchuk C, Richardson J, Atyeo H, Serrato J. Qualitative findings from a Housing First evaluation project for homeless Veterans in Canada. *Journal of Military, Veteran and Family Health*. 2022; 8:27-38.

- 1  
2  
3 37. Henderson PM. Program evaluation of a long-term substance abuse treatment  
4 program for homeless men: Spalding University; 2003.
- 5 38. Pauly B, King V, Smith A, Tranquilli-Doherty S, Wishart M, Vallance K, et al. Breaking  
6 the cycle of survival drinking: insights from a non-residential, peer-initiated and peer-run  
7 managed alcohol program. *Drugs: Education, Prevention and Policy*. 2021; 28:172-80.
- 8 39. Rash CJ, Alessi SM, Petry NM. Substance abuse treatment patients in housing  
9 programs respond to contingency management interventions. *Journal of Substance Abuse  
10 Treatment*. 2017; 72:97-102.
- 11 40. Pratt R, Pernat C, Kerandi L, Kmiecik A, Strobel-Ayres C, Joseph A, et al. "It's a hard  
12 thing to manage when you're homeless": the impact of the social environment on smoking  
13 cessation for smokers experiencing homelessness. *BMC Public Health*. 2019; 19:1-8.
- 14 41. Pratt R, Xiong S, Kmiecik A, Strobel-Ayres C, Joseph A, Rose SAE, et al. The  
15 implementation of a smoking cessation and alcohol abstinence intervention for people  
16 experiencing homelessness. *BMC public health*. 2022; 22:1260.
- 17 42. Baggett TP, Singer DE, Rao SR, O'Connell JJ, Bharel M, Rigotti NA. Food Insufficiency  
18 and Health Services Utilization in a National Sample of Homeless Adults. *Journal of General  
19 Internal Medicine*. 2011; 26:627-34.
- 20 43. Fallaize R, Seale JV, Mortin C, Armstrong L, Lovegrove JA. Dietary intake, nutritional  
21 status and mental wellbeing of homeless adults in Reading, UK. *British Journal of Nutrition*.  
22 2017; 118:707-14.
- 23 44. Okuyemi KS, Caldwell AR, Thomas JL, Born W, Richter KP, Nollen N, et al.  
24 Homelessness and Smoking Cessation: Insights from Focus Groups. *Nicotine Tob Res*. 2006;  
25 8:287-96.
- 26 45. Langnäse K, Müller MJ. Nutrition and health in an adult urban homeless population  
27 in Germany. *Public Health Nutrition*. 2001; 4:805-11.
- 28 46. Knudsen HK. Implementation of smoking cessation treatment in substance use  
29 disorder treatment settings: a review. *The American Journal of Drug and Alcohol Abuse*.  
30 2017; 43:215-25.
- 31 47. Kim JE, Flentje A, Tsoh JY, Riley ED. Cigarette Smoking among Women Who Are  
32 Homeless or Unstably Housed: Examining the Role of Food Insecurity. *J Urban Health*. 2017;  
33 94:514-24.
- 34 48. Beaton L, Anderson I, Humphris G, Rodriguez A, Freeman R. Implementing an Oral  
35 Health Intervention for People Experiencing Homelessness in Scotland: A Participant  
36 Observation Study. *Dentistry Journal*. 2018; 6:68.
- 37 49. Paisi M, Kay E, Plessas A, Burns L, Quinn C, Brennan N, et al. Barriers and enablers to  
38 accessing dental services for people experiencing homelessness: A systematic review.  
39 *Community dentistry and oral epidemiology*. 2019; 47:103-11.
- 40 50. Soar K, Dawkins L, Robson D, Cox S. Smoking amongst adults experiencing  
41 homelessness: a systematic review of prevalence rates, interventions and the barriers and  
42 facilitators to quitting and staying quit. *Journal of Smoking Cessation*. 2020; 15:94-108.
- 43 51. Xiang X. A review of interventions for substance use among homeless youth.  
44 *Research on Social Work Practice*. 2013; 23:34-45.
- 45 52. Nyamathi A, Kennedy B, Branson C, Salem B, Khalilifard F, Marfisee M, et al. Impact  
46 of Nursing Intervention on Improving HIV, Hepatitis Knowledge and Mental Health Among  
47 Homeless Young Adults. *Community Mental Health Journal*. 2013; 49:178-84.
- 48 53. Young SD, Rice E. Online social networking technologies, HIV knowledge, and sexual  
49 risk and testing behaviors among homeless youth. *AIDS and Behavior*. 2011; 15:253-60.
- 50  
51  
52  
53  
54  
55  
56  
57  
58  
59  
60



1  
2  
3 54. Slesnick N, Kang MJ. The impact of an integrated treatment on HIV risk behavior  
4 among homeless youth: a randomized controlled trial. Journal of behavioral medicine. 2008;  
5 31:45-59.  
6  
7  
8  
9  
10  
11  
12  
13  
14  
15  
16  
17  
18  
19  
20  
21  
22  
23  
24  
25  
26  
27  
28  
29  
30  
31  
32  
33  
34  
35  
36  
37  
38  
39  
40  
41  
42  
43  
44  
45  
46  
47  
48  
49  
50  
51  
52  
53  
54  
55  
56  
57  
58  
59  
60

For peer review only

Figure 1: PRISMA Flowchart for the search results.

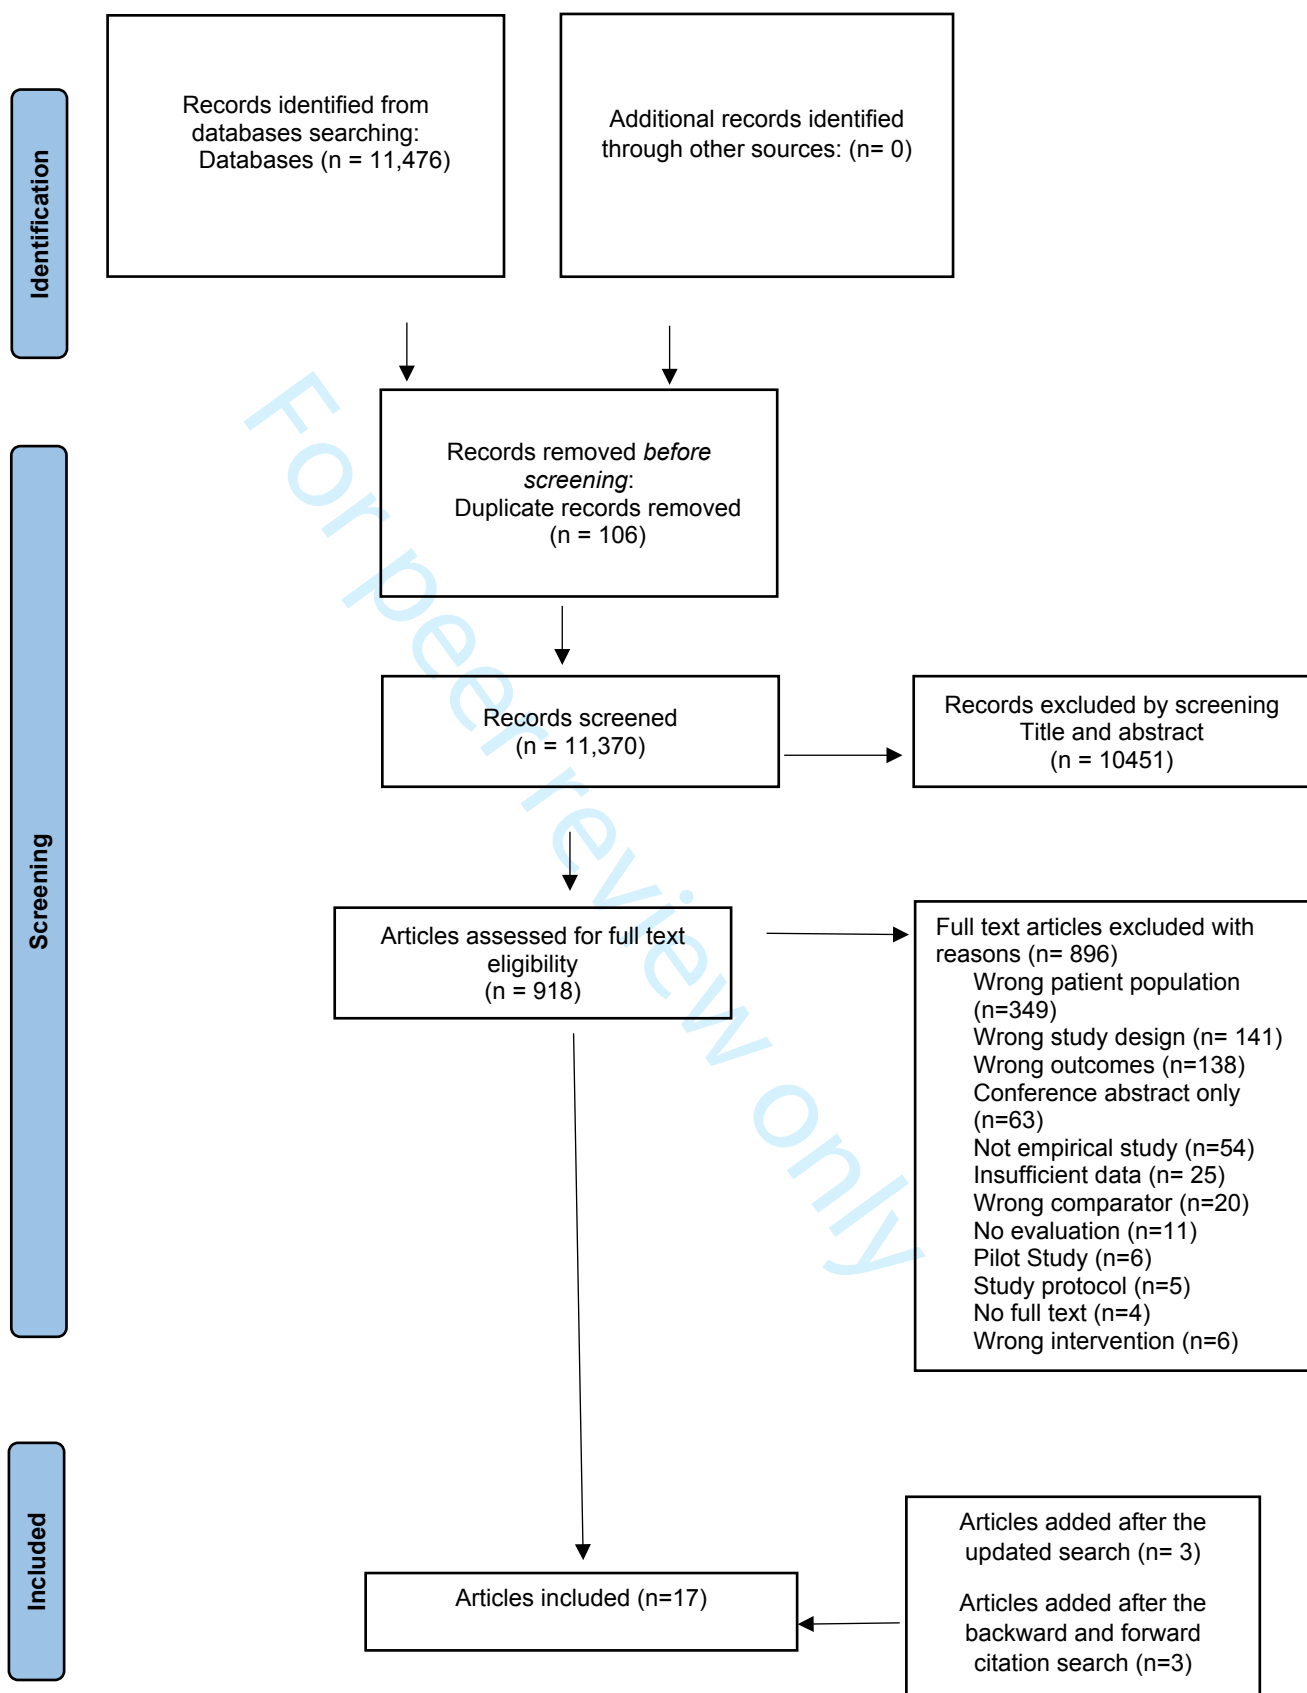

## Appendix A: Search Strategy

| #  | Searches                                                                                                                   |
|----|----------------------------------------------------------------------------------------------------------------------------|
| 1  | Homeless Persons/                                                                                                          |
| 2  | homeless*.ti,ab,kw,kf.                                                                                                     |
| 3  | ((hous* or home* or accommodat* or shelter) adj3 (insecur* or instability or unstable or stability)).ti,ab,kw,kf.          |
| 4  | (sleep* adj2 rough).ti,ab,kw,kf.                                                                                           |
| 5  | squatter*.ti,ab,kw,kf.                                                                                                     |
| 6  | shelter.ti,ab,kw,kf.                                                                                                       |
| 7  | "sofa surf*".ti,ab,kw,kf.                                                                                                  |
| 8  | or/1-7                                                                                                                     |
| 9  | ((severe or multiple) adj disadvantage*).ti,ab,kw,kf.                                                                      |
| 10 | "social exclusion".ti,ab,kw,kf.                                                                                            |
| 11 | "complex needs".ti,ab,kw,kf.                                                                                               |
| 12 | "marginali?ed populations".ti,ab,kw,kf.                                                                                    |
| 13 | or/9-12                                                                                                                    |
| 14 | exp Substance-Related Disorders/                                                                                           |
| 15 | Behavior, Addictive/                                                                                                       |
| 16 | addict*.ti,ab,kw,kf.                                                                                                       |
| 17 | ((alcohol or drug or substance) adj1 (misuse or abuse or use* or addict* or dependenc* or issue* or problem)).ti,ab,kw,kf. |
| 18 | Alcoholics/                                                                                                                |
| 19 | alcoholic*.ti,ab,kw,kf.                                                                                                    |
| 20 | (drug adj1 (habit or tak* or hard or illicit or inject*)).ti,ab,kw,kf.                                                     |
| 21 | exp Illicit Drugs/                                                                                                         |
| 22 | Alcohol Drinking/                                                                                                          |
| 23 | "street drink*".ti,ab,kw,kf.                                                                                               |
| 24 | or/14-23                                                                                                                   |
| 25 | Prisoners/                                                                                                                 |
| 26 | prisoner*.ti,ab,kw,kf.                                                                                                     |
| 27 | Criminals/                                                                                                                 |
| 28 | criminal*.ti,ab,kw,kf.                                                                                                     |
| 29 | ((repeat or ex or re or revolving door) adj1 offen*).ti,ab,kw,kf.                                                          |
| 30 | (convict or convicts or "convicted person").ti,ab,kw,kf.                                                                   |
| 31 | or/25-30                                                                                                                   |
| 32 | 8 or 13 or 24 or 31                                                                                                        |
| 33 | Oral Health/                                                                                                               |
| 34 | ("oral health" or "dental health").ti,ab,kw,kf.                                                                            |
| 35 | Oral Hygiene/                                                                                                              |
| 36 | "oral hygiene".ti,ab,kw,kf.                                                                                                |
| 37 | Mouth Rehabilitation/                                                                                                      |
| 38 | "mouth rehabilitation*".ti,ab,kw,kf.                                                                                       |
| 39 | Dental Health Services/                                                                                                    |
| 40 | "dental health service*".ti,ab,kw,kf.                                                                                      |
| 41 | Dental Care/                                                                                                               |
| 42 | "dental care".ti,ab,kw,kf.                                                                                                 |
| 43 | exp Dental Caries/                                                                                                         |

|    |                                                                                                                  |
|----|------------------------------------------------------------------------------------------------------------------|
| 44 | "dental caries".ti,ab,kw,kf.                                                                                     |
| 45 | Dental Enamel Solubility/                                                                                        |
| 46 | "dental enamel solubility".ti,ab,kw,kf.                                                                          |
| 47 | Dental Deposits/                                                                                                 |
| 48 | "dental deposits".ti,ab,kw,kf.                                                                                   |
| 49 | Dentin Sensitivity/                                                                                              |
| 50 | "dentin sensitivity".ti,ab,kw,kf.                                                                                |
| 51 | Dental Plaque/                                                                                                   |
| 52 | "dental plaque".ti,ab,kw,kf.                                                                                     |
| 53 | exp Dental Pulp Diseases/                                                                                        |
| 54 | "dental pulp disease*".ti,ab,kw,kf.                                                                              |
| 55 | Tooth Loss/                                                                                                      |
| 56 | "tooth loss".ti,ab,kw,kf.                                                                                        |
| 57 | "loss of teeth".ti,ab,kw,kf.                                                                                     |
| 58 | Tooth Diseases/                                                                                                  |
| 59 | ("tooth disease" or "diseased teeth").ti,ab,kw,kf.                                                               |
| 60 | Toothache/                                                                                                       |
| 61 | (toothache or "tooth ache").ti,ab,kw,kf.                                                                         |
| 62 | Tooth Demineralization/                                                                                          |
| 63 | Tooth Mobility/                                                                                                  |
| 64 | Tooth Discoloration/                                                                                             |
| 65 | (tooth adj1 (demineralization or mobility or decay or discoloration)).ti,ab,kw,kf.                               |
| 66 | Mouth Diseases/                                                                                                  |
| 67 | Periodontal Diseases/                                                                                            |
| 68 | Gingival Diseases/                                                                                               |
| 69 | ((mouth or periodontal or gingival or gum) adj1 disease*).ti,ab,kw,kf.                                           |
| 70 | exp Periodontitis/                                                                                               |
| 71 | periodontitis.ti,ab,kw,kf.                                                                                       |
| 72 | Preventive Dentistry/                                                                                            |
| 73 | "Preventive Dentistry".ti,ab,kw,kf.                                                                              |
| 74 | exp Gingivitis/                                                                                                  |
| 75 | ((oral or dental or tooth or teeth) adj1 abscess).ti,ab,kw,kf.                                                   |
| 76 | (dental adj1 (pain or sequelae)).ti,ab,kw,kf.                                                                    |
| 77 | "bleeding gum*".ti,ab,kw,kf.                                                                                     |
| 78 | (hole* adj2 (tooth or teeth)).ti,ab,kw,kf.                                                                       |
| 79 | or/33-78                                                                                                         |
| 80 | exp Mouth Neoplasms/                                                                                             |
| 81 | ((oral or mouth or tongue or salivary or parotid) adj1 (cancer* or tumour* or tumor* or neoplasm*)).ti,ab,kw,kf. |
| 82 | 80 or 81                                                                                                         |
| 83 | 79 or 82                                                                                                         |
| 84 | exp Smoking/                                                                                                     |
| 85 | (smoking or smoker or smoke or smoked or smokes).ti,ab,kw,kf.                                                    |
| 86 | Tobacco/                                                                                                         |
| 87 | "Tobacco Use Cessation"/ or exp "Tobacco Use"/ or exp "Tobacco Use Cessation Devices"/                           |
| 88 | Smoking Cessation/                                                                                               |
| 89 | "smoking cessation*".ti,ab,kw,kf.                                                                                |

|     |                                                                                                                                                                           |
|-----|---------------------------------------------------------------------------------------------------------------------------------------------------------------------------|
| 90  | Tobacco Products/                                                                                                                                                         |
| 91  | Nicotine/                                                                                                                                                                 |
| 92  | (tobacco or cigar* or e-cig* or nicotine or hookah or pipe or vaping or vape).ti,ab,kw,kf.                                                                                |
| 93  | or/84-92                                                                                                                                                                  |
| 94  | ((sugar or sucrose or fructose or glucose) adj2 (intake or consum*)).ti,ab,kw,kf.                                                                                         |
| 95  | "high sugar diet".ti,ab,kw,kf.                                                                                                                                            |
| 96  | "sugary foods".ti,ab,kw,kf.                                                                                                                                               |
| 97  | exp Dietary Sugars/                                                                                                                                                       |
| 98  | ((processed or acidic) adj1 food*).ti,ab,kw,kf.                                                                                                                           |
| 99  | ((sugary or fizzy or carbonated or soft) adj1 drink*).ti,ab,kw,kf.                                                                                                        |
| 100 | carbonated beverages/ or sugar-sweetened beverages/                                                                                                                       |
| 101 | soda.ti,ab,kw,kf.                                                                                                                                                         |
| 102 | or/94-101                                                                                                                                                                 |
| 103 | ((abuse or sniff*) adj3 (solvent* or glue or gas or aerosol* or inhalant)).ti,ab,kw,kf.                                                                                   |
| 104 | addict*.ti,ab,kw,kf.                                                                                                                                                      |
| 105 | ((alcohol or drug or substance) adj1 (misuse or abuse or use* or addict* or dependen* or issue* or problem or prevention or treatment or recovery or habit)).ti,ab,kw,kf. |
| 106 | alcoholic*.ti,ab,kw,kf.                                                                                                                                                   |
| 107 | Alcoholics/                                                                                                                                                               |
| 108 | (drug adj1 (tak* or hard or illicit or inject*)).ti,ab,kw,kf.                                                                                                             |
| 109 | exp Illicit Drugs/                                                                                                                                                        |
| 110 | "street drink*".ti,ab,kw,kf.                                                                                                                                              |
| 111 | or/103-110                                                                                                                                                                |
| 112 | 83 or 93 or 102 or 111                                                                                                                                                    |
| 113 | 32 and 112                                                                                                                                                                |
| 114 | intervention*.ti,ab,kw.                                                                                                                                                   |
| 115 | program*.ti,ab,kw.                                                                                                                                                        |
| 116 | (care adj3 package*).ti,ab,kw.                                                                                                                                            |
| 117 | feasab*.ti,ab,kw.                                                                                                                                                         |
| 118 | acceptab*.ti,ab,kw.                                                                                                                                                       |
| 119 | efficacy.ti,ab,kw.                                                                                                                                                        |
| 120 | effective*.ti,ab,kw.                                                                                                                                                      |
| 121 | training.ti,ab,kw.                                                                                                                                                        |
| 122 | educat*.ti,ab,kw.                                                                                                                                                         |
| 123 | evaluat*.ti,ab,kw.                                                                                                                                                        |
| 124 | strateg*.ti,ab,kw.                                                                                                                                                        |
| 125 | pilot.ti,ab,kw.                                                                                                                                                           |
| 126 | perception*.ti,ab,kw,kf.                                                                                                                                                  |
| 127 | belief*.ti,ab,kw,kf.                                                                                                                                                      |
| 128 | uptake.ti,ab,kw,kf.                                                                                                                                                       |
| 129 | impact.ti,ab,kw,kf.                                                                                                                                                       |
| 130 | consequence*.ti,ab,kw,kf.                                                                                                                                                 |
| 131 | attitude*.ti,ab,kw,kf.                                                                                                                                                    |
| 132 | barrier*.ti,ab,kw,kf.                                                                                                                                                     |
| 133 | facilitat*.ti,ab,kw,kf.                                                                                                                                                   |

|     |                               |
|-----|-------------------------------|
| 134 | motivat*.ti,ab,kw,kf.         |
| 135 | or/114-134                    |
| 136 | 113 and 135                   |
| 137 | limit 136 to english language |

For peer review only

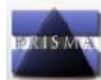

## PRISMA 2020 Checklist

| Section and Topic             | Item # | Checklist item                                                                                                                                                                                                                                                                                       | Location where item is reported |
|-------------------------------|--------|------------------------------------------------------------------------------------------------------------------------------------------------------------------------------------------------------------------------------------------------------------------------------------------------------|---------------------------------|
| <b>TITLE</b>                  |        |                                                                                                                                                                                                                                                                                                      |                                 |
| Title                         | 1      | Identify the report as a systematic review.                                                                                                                                                                                                                                                          | Lines 2-3                       |
| <b>ABSTRACT</b>               |        |                                                                                                                                                                                                                                                                                                      |                                 |
| Abstract                      | 2      | See the PRISMA 2020 for Abstracts checklist.                                                                                                                                                                                                                                                         | Page 1                          |
| <b>INTRODUCTION</b>           |        |                                                                                                                                                                                                                                                                                                      |                                 |
| Rationale                     | 3      | Describe the rationale for the review in the context of existing knowledge.                                                                                                                                                                                                                          | Lines 38 - 44                   |
| Objectives                    | 4      | Provide an explicit statement of the objective(s) or question(s) the review addresses.                                                                                                                                                                                                               | Lines 54-56                     |
| <b>METHODS</b>                |        |                                                                                                                                                                                                                                                                                                      |                                 |
| Eligibility criteria          | 5      | Specify the inclusion and exclusion criteria for the review and how studies were grouped for the syntheses.                                                                                                                                                                                          | Table 1                         |
| Information sources           | 6      | Specify all databases, registers, websites, organisations, reference lists and other sources searched or consulted to identify studies. Specify the date when each source was last searched or consulted.                                                                                            | Lines 63-68                     |
| Search strategy               | 7      | Present the full search strategies for all databases, registers and websites, including any filters and limits used.                                                                                                                                                                                 | Appendix A.                     |
| Selection process             | 8      | Specify the methods used to decide whether a study met the inclusion criteria of the review, including how many reviewers screened each record and each report retrieved, whether they worked independently, and if applicable, details of automation tools used in the process.                     | Lines 70 - 73                   |
| Data collection process       | 9      | Specify the methods used to collect data from reports, including how many reviewers collected data from each report, whether they worked independently, any processes for obtaining or confirming data from study investigators, and if applicable, details of automation tools used in the process. | Lines 85 - 91                   |
| Data items                    | 10a    | List and define all outcomes for which data were sought. Specify whether all results that were compatible with each outcome domain in each study were sought (e.g. for all measures, time points, analyses), and if not, the methods used to decide which results to collect.                        | Table 1                         |
|                               | 10b    | List and define all other variables for which data were sought (e.g. participant and intervention characteristics, funding sources). Describe any assumptions made about any missing or unclear information.                                                                                         | Table 1 and Table 2             |
| Study risk of bias assessment | 11     | Specify the methods used to assess risk of bias in the included studies, including details of the tool(s) used, how many reviewers assessed each study and whether they worked independently, and if applicable, details of automation tools used in the process.                                    | Lines 75 - 83                   |
| Effect measures               | 12     | Specify for each outcome the effect measure(s) (e.g. risk ratio, mean difference) used in the synthesis or presentation of results.                                                                                                                                                                  | Table 2                         |
| Synthesis methods             | 13a    | Describe the processes used to decide which studies were eligible for each synthesis (e.g. tabulating the study intervention characteristics and comparing against the planned groups for each synthesis (item #5)).                                                                                 | Table 1                         |
|                               | 13b    | Describe any methods required to prepare the data for presentation or synthesis, such as handling of missing summary statistics, or data conversions.                                                                                                                                                | Lines 85 - 91                   |
|                               | 13c    | Describe any methods used to tabulate or visually display results of individual studies and syntheses.                                                                                                                                                                                               | Lines 85 - 91                   |
|                               | 13d    | Describe any methods used to synthesize results and provide a rationale for the choice(s). If meta-analysis was performed, describe the model(s), method(s) to identify the presence and extent of statistical heterogeneity, and software package(s) used.                                          | Lines 85 - 91                   |
|                               | 13e    | Describe any methods used to explore possible causes of heterogeneity among study results (e.g. subgroup analysis, meta-regression).                                                                                                                                                                 | N/A                             |
|                               | 13f    | Describe any sensitivity analyses conducted to assess robustness of the synthesized results.                                                                                                                                                                                                         | N/A                             |
| Reporting bias                | 14     | Describe any methods used to assess risk of bias due to missing results in a synthesis (arising from reporting biases).                                                                                                                                                                              | Lines 75 -                      |

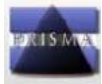

## PRISMA 2020 Checklist

| Section and Topic             | Item # | Checklist item                                                                                                                                                                                                                                                                       | Location where item is reported |
|-------------------------------|--------|--------------------------------------------------------------------------------------------------------------------------------------------------------------------------------------------------------------------------------------------------------------------------------------|---------------------------------|
| assessment                    |        |                                                                                                                                                                                                                                                                                      | 83                              |
| Certainty assessment          | 15     | Describe any methods used to assess certainty (or confidence) in the body of evidence for an outcome.                                                                                                                                                                                | Lines 75 - 83                   |
| <b>RESULTS</b>                |        |                                                                                                                                                                                                                                                                                      |                                 |
| Study selection               | 16a    | Describe the results of the search and selection process, from the number of records identified in the search to the number of studies included in the review, ideally using a flow diagram.                                                                                         | Figure 1                        |
|                               | 16b    | Cite studies that might appear to meet the inclusion criteria, but which were excluded, and explain why they were excluded.                                                                                                                                                          | Figure 1                        |
| Study characteristics         | 17     | Cite each included study and present its characteristics.                                                                                                                                                                                                                            | Table 2                         |
| Risk of bias in studies       | 18     | Present assessments of risk of bias for each included study.                                                                                                                                                                                                                         | Table 2                         |
| Results of individual studies | 19     | For all outcomes, present, for each study: (a) summary statistics for each group (where appropriate) and (b) an effect estimate and its precision (e.g. confidence/credible interval), ideally using structured tables or plots.                                                     | Table 1                         |
| Results of syntheses          | 20a    | For each synthesis, briefly summarise the characteristics and risk of bias among contributing studies.                                                                                                                                                                               | Lines 102 - 108                 |
|                               | 20b    | Present results of all statistical syntheses conducted. If meta-analysis was done, present for each the summary estimate and its precision (e.g. confidence/credible interval) and measures of statistical heterogeneity. If comparing groups, describe the direction of the effect. | N/A                             |
|                               | 20c    | Present results of all investigations of possible causes of heterogeneity among study results.                                                                                                                                                                                       | N/A                             |
|                               | 20d    | Present results of all sensitivity analyses conducted to assess the robustness of the synthesized results.                                                                                                                                                                           | N/A                             |
| Reporting biases              | 21     | Present assessments of risk of bias due to missing results (arising from reporting biases) for each synthesis assessed.                                                                                                                                                              | Lines 103 - 108                 |
| Certainty of evidence         | 22     | Present assessments of certainty (or confidence) in the body of evidence for each outcome assessed.                                                                                                                                                                                  | N/A                             |
| <b>DISCUSSION</b>             |        |                                                                                                                                                                                                                                                                                      |                                 |
| Discussion                    | 23a    | Provide a general interpretation of the results in the context of other evidence.                                                                                                                                                                                                    | Lines 223 - 251                 |
|                               | 23b    | Discuss any limitations of the evidence included in the review.                                                                                                                                                                                                                      | Lines 274 - 277                 |
|                               | 23c    | Discuss any limitations of the review processes used.                                                                                                                                                                                                                                | Lines 277 - 278                 |
|                               | 23d    | Discuss implications of the results for practice, policy, and future research.                                                                                                                                                                                                       | Lines 281 - 288                 |
| <b>OTHER INFORMATION</b>      |        |                                                                                                                                                                                                                                                                                      |                                 |
| Registration and protocol     | 24a    | Provide registration information for the review, including register name and registration number, or state that the review was not registered.                                                                                                                                       | Lines 58 - 59                   |
|                               | 24b    | Indicate where the review protocol can be accessed, or state that a protocol was not prepared.                                                                                                                                                                                       | Lines 58 - 59                   |



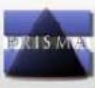

# PRISMA 2020 Checklist

1  
2  
3  
4  
5  
6  
7  
8  
9  
10  
11  
12  
13  
14  
15  
16  
17  
18  
19  
20  
21  
22  
23  
24  
25  
26  
27  
28  
29  
30  
31  
32  
33  
34  
35  
36  
37  
38  
39  
40  
41  
42  
43  
44  
45  
46  
47

| Section and Topic                              | Item # | Checklist item                                                                                                                                                                                                                             | Location where item is reported |
|------------------------------------------------|--------|--------------------------------------------------------------------------------------------------------------------------------------------------------------------------------------------------------------------------------------------|---------------------------------|
|                                                | 24c    | Describe and explain any amendments to information provided at registration or in the protocol.                                                                                                                                            |                                 |
| Support                                        | 25     | Describe sources of financial or non-financial support for the review, and the role of the funders or sponsors in the review.                                                                                                              | Lines 295 - 300                 |
| Competing interests                            | 26     | Declare any competing interests of review authors.                                                                                                                                                                                         | Lines 302-304                   |
| Availability of data, code and other materials | 27     | Report which of the following are publicly available and where they can be found: template data collection forms; data extracted from included studies; data used for all analyses; analytic code; any other materials used in the review. | N/A                             |

From: Page MJ, McKenzie JE, Bossuyt PM, Boutron I, Hoffmann TC, Mulrow CD, et al. The PRISMA 2020 statement: an updated guideline for reporting systematic reviews. *BMJ* 2021;372:n71. doi: 10.1136/bmj.n71

For more information, visit: <http://www.prisma-statement.org/>

# BMJ Open

## Factors influencing implementation and sustainability of interventions to improve oral health and related health behaviours in adults experiencing severe and multiple disadvantage: A mixed-methods systematic review

|                                 |                                                                                                                                                                                                                                                                                                                                                                                                                                                                                                                                                                                                                                                                                                                                                                                                                                                                                                                                                                                                                                                                                                                                                                                                                                                                                                                                                                                                                              |
|---------------------------------|------------------------------------------------------------------------------------------------------------------------------------------------------------------------------------------------------------------------------------------------------------------------------------------------------------------------------------------------------------------------------------------------------------------------------------------------------------------------------------------------------------------------------------------------------------------------------------------------------------------------------------------------------------------------------------------------------------------------------------------------------------------------------------------------------------------------------------------------------------------------------------------------------------------------------------------------------------------------------------------------------------------------------------------------------------------------------------------------------------------------------------------------------------------------------------------------------------------------------------------------------------------------------------------------------------------------------------------------------------------------------------------------------------------------------|
| Journal:                        | <i>BMJ Open</i>                                                                                                                                                                                                                                                                                                                                                                                                                                                                                                                                                                                                                                                                                                                                                                                                                                                                                                                                                                                                                                                                                                                                                                                                                                                                                                                                                                                                              |
| Manuscript ID                   | bmjopen-2023-080160.R1                                                                                                                                                                                                                                                                                                                                                                                                                                                                                                                                                                                                                                                                                                                                                                                                                                                                                                                                                                                                                                                                                                                                                                                                                                                                                                                                                                                                       |
| Article Type:                   | Original research                                                                                                                                                                                                                                                                                                                                                                                                                                                                                                                                                                                                                                                                                                                                                                                                                                                                                                                                                                                                                                                                                                                                                                                                                                                                                                                                                                                                            |
| Date Submitted by the Author:   | 04-Dec-2023                                                                                                                                                                                                                                                                                                                                                                                                                                                                                                                                                                                                                                                                                                                                                                                                                                                                                                                                                                                                                                                                                                                                                                                                                                                                                                                                                                                                                  |
| Complete List of Authors:       | John , Deepti; Newcastle University Population Health Sciences Institute<br>Adams, Emma; Newcastle University Population Health Sciences Institute<br>McGowan, Laura; Newcastle University Population Health Sciences Institute<br>Joyes, Emma; Newcastle University Population Health Sciences Institute<br>Richmond, Catherine; Newcastle University Population Health Sciences Institute<br>Beyer, Fiona ; Newcastle University Population Health Sciences Institute, Evidence Synthesis Group and Innovation Observatory<br>Landes, David; NHS England and NHS Improvement North East and Yorkshire<br>Watt, Richard; University College London, Epidemiology and Public Health; King's College London, King's College Dental Institute<br>Sniehotta, Falko; Newcastle University Population Health Sciences Institute, NIHR Policy Research Unit Behavioural Science; Heidelberg University Medical Faculty Mannheim, Department of Public Health, Social and Preventive Medicine, Centre for Preventive Medicine and Digital Health (CPD)<br>Paisi, Martha; Plymouth University Peninsula Dental School<br>Bambra, Clare; Newcastle University Population Health Sciences Institute<br>Craig, Dawn; Newcastle University Population Health Sciences Institute<br>Kaner, Eileen; Newcastle University Population Health Sciences Institute<br>Ramsay, Sheena; Newcastle University Population Health Sciences Institute |
| <b>Primary Subject Heading</b>: | Public health                                                                                                                                                                                                                                                                                                                                                                                                                                                                                                                                                                                                                                                                                                                                                                                                                                                                                                                                                                                                                                                                                                                                                                                                                                                                                                                                                                                                                |
| Secondary Subject Heading:      | Health policy, Smoking and tobacco, Dentistry and oral medicine                                                                                                                                                                                                                                                                                                                                                                                                                                                                                                                                                                                                                                                                                                                                                                                                                                                                                                                                                                                                                                                                                                                                                                                                                                                                                                                                                              |
| Keywords:                       | Health Equity, PUBLIC HEALTH, Behavior                                                                                                                                                                                                                                                                                                                                                                                                                                                                                                                                                                                                                                                                                                                                                                                                                                                                                                                                                                                                                                                                                                                                                                                                                                                                                                                                                                                       |
|                                 |                                                                                                                                                                                                                                                                                                                                                                                                                                                                                                                                                                                                                                                                                                                                                                                                                                                                                                                                                                                                                                                                                                                                                                                                                                                                                                                                                                                                                              |

1  
2  
3  
4  
5  
6  
7  
8  
9  
10  
11  
12  
13  
14  
15  
16  
17  
18  
19  
20  
21  
22  
23  
24  
25  
26  
27  
28  
29  
30  
31  
32  
33  
34  
35  
36  
37  
38  
39  
40  
41  
42  
43  
44  
45  
46  
47  
48  
49  
50  
51  
52  
53  
54  
55  
56  
57  
58  
59  
60



I, the Submitting Author has the right to grant and does grant on behalf of all authors of the Work (as defined in the below author licence), an exclusive licence and/or a non-exclusive licence for contributions from authors who are: i) UK Crown employees; ii) where BMJ has agreed a CC-BY licence shall apply, and/or iii) in accordance with the terms applicable for US Federal Government officers or employees acting as part of their official duties; on a worldwide, perpetual, irrevocable, royalty-free basis to BMJ Publishing Group Ltd ("BMJ") its licensees and where the relevant Journal is co-owned by BMJ to the co-owners of the Journal, to publish the Work in this journal and any other BMJ products and to exploit all rights, as set out in our [licence](#).

The Submitting Author accepts and understands that any supply made under these terms is made by BMJ to the Submitting Author unless you are acting as an employee on behalf of your employer or a postgraduate student of an affiliated institution which is paying any applicable article publishing charge ("APC") for Open Access articles. Where the Submitting Author wishes to make the Work available on an Open Access basis (and intends to pay the relevant APC), the terms of reuse of such Open Access shall be governed by a Creative Commons licence – details of these licences and which [Creative Commons](#) licence will apply to this Work are set out in our licence referred to above.

Other than as permitted in any relevant BMJ Author's Self Archiving Policies, I confirm this Work has not been accepted for publication elsewhere, is not being considered for publication elsewhere and does not duplicate material already published. I confirm all authors consent to publication of this Work and authorise the granting of this licence.

1  
2  
3 **Factors influencing implementation and sustainability of interventions to improve oral health and**  
4 **related health behaviours in adults experiencing severe and multiple disadvantage: A mixed-**  
5 **methods systematic review**  
6  
7

8  
9 **Authors**

10 Mrs. Deepti A. John, MDPH - Population Health Sciences Institute, Newcastle University, Newcastle  
11 Upon Tyne NE2 4AX, UK

12 Ms. Emma A. Adams, MSc. - Population Health Sciences Institute, Newcastle University, Newcastle  
13 Upon Tyne NE2 4AX, UK

14 Dr. Laura J. McGowan, PhD - Population Health Sciences Institute, Newcastle University, Newcastle  
15 Upon Tyne NE2 4AX, UK

16 Dr. Emma C. Joyes, PhD - Population Health Sciences Institute, Newcastle University, Newcastle  
17 Upon Tyne NE2 4AX, UK

18 Ms. Catherine Richmond, MA - Population Health Sciences Institute, Newcastle University,  
19 Newcastle Upon Tyne NE2 4AX, UK

20 Dr. Fiona R. Beyer, PhD - Evidence Synthesis Group and Innovation Observatory, Population Health  
21 Sciences Institute, Newcastle University, Newcastle Upon Tyne NE2 4AX, UK

22 Mr. David Landes, BDS - NHS England & Improvement, Newcastle Upon Tyne NE15 8NY, UK

23 Prof. Richard Watt, PhD - Department of Epidemiology and Public Health, University College London,  
24 London WC1E 7HB, UK

25 Prof. Falko F. Sniehotta, PhD - NIHR Policy Research Unit Behavioural Science, Newcastle University,  
26 NE2 4AX And Department of Public Health, Social and Preventive Medicine, Centre for Preventive  
27 Medicine and Digital Health (CPD), Medical Faculty Mannheim, Heidelberg University, 68167  
28 Mannheim

29 Dr. Martha Paisi, PhD - Faculty of Medicine and Dentistry, Peninsula Dental School, University of  
30 Plymouth, Plymouth PL4 8AA, UK

31 Prof. Clare Bambra, PhD - Population Health Sciences Institute, Newcastle University, Newcastle  
32 Upon Tyne NE2 4AX, UK

33 Prof. Dawn Craig, MSc. - Population Health Sciences Institute, Newcastle University, Newcastle Upon  
34 Tyne NE2 4AX, UK

35 Prof. Eileen Kaner, PhD - Population Health Sciences Institute, Newcastle University, Newcastle Upon  
36 Tyne NE2 4AX, UK

37 Prof. Sheena E. Ramsay, PhD - Population Health Sciences Institute, Newcastle University, Newcastle  
38 Upon Tyne NE2 4AX, UK

39  
40  
41  
42  
43 **Corresponding Author:**

44 Deepti John

45 [Deepti.john@newcastle.ac.uk](mailto:Deepti.john@newcastle.ac.uk)

46 Phone no: +44 7469646623

47 Population Health Sciences Institute, Newcastle University

48 The Baddiley-Clark Building, Richardson Road

49 Newcastle upon Tyne, NE2 4AX

50 United Kingdom  
51  
52  
53  
54  
55  
56  
57  
58  
59  
60

## Abstract

### Objectives

Among people experiencing severe and multiple disadvantage (SMD) poor oral health is common and linked to smoking, substance use and high sugar intake. Studies have explored interventions addressing oral health and related behaviours; however, factors related to the implementation of these interventions remains unclear. This mixed-methods systematic review aimed to synthesize evidence on the implementation and sustainability of interventions to improve oral health and related health behaviours among adults experiencing SMD.

### Methods

Bibliographic databases (MEDLINE, EMBASE, PsycINFO, CINAHL, EBSCO, Scopus) and grey literature were searched from inception to February 2023. Studies meeting the inclusion criteria were screened and extracted independently by two researchers. Quality appraisal was undertaken, and results were synthesised using narrative and thematic analyses.

### Results

Seventeen papers were included (published between 1995-2022). Studies were mostly of moderate quality and included views from SMD groups and service providers. From the qualitative synthesis, most findings were related to aspects such as trust, resources, and motivation levels of SMD groups and service providers. None of the studies reported on diet and none included repeated offending (one of the aspects of SMD). From the quantitative synthesis, no difference was observed in program attendance between the interventions and usual care, although there was some indication of sustained improvements in participation in the intervention group.

### Conclusion

This review provides some evidence that trust, adequate resources, and motivation levels are potentially important in implementing interventions to improve oral health and substance use among SMD groups. Further research is needed from high quality studies and focusing on diet in this population.

### Strengths and limitations of this study

- Comprehensive search strategy was used to gather evidence in this mixed methods systematic review.

- Consolidated Framework for Implementation Research (CFIR) was used for the data extraction.
- Confidence in the papers were limited due to moderate quality of the papers.
- The included studies were not excluded based on their quality, as they contributed relevant information for this systematic review.

**Keywords:** multiple disadvantage, homeless, oral health, implementation

## INTRODUCTION

Severe and multiple disadvantaged (SMD) populations are individuals who have experienced homelessness, substance use, offending or a combination of all three.(1) They experience disproportionately high levels of poor physical and mental health along with high levels of occupational deprivation,(1) which results in isolation and difficulty in accessing healthcare services.(2) There is also an added burden of stigma that affects their access and engagement.(3)

Among people experiencing SMD, oral health problems have been highlighted as one of the major unmet needs.(4) Aggravated by high levels of smoking, substance and alcohol use and poor diet (high intake of sugar).(4, 5) Elevated tobacco use make them more susceptible to periodontal disease, tooth loss, oral lesions and oral cancer.(5, 6) Research also shows that they do not meet the daily nutritional requirements and have high levels of sugar consumption.(6, 7) Oral health has an overall impact on physical and mental wellbeing.(8) It is, therefore, important to not only address oral health concerns in people experiencing SMD, but also related health behaviours such as smoking, alcohol and substance use, and poor nutrition.(1, 9)

Previous papers focus on intervention design and outcomes, none focus on the implementation approach of these intervention especially in people experiencing SMD.(10, 11, 12) Hence, there is a need for evidence on interventions addressing these health challenges, with a specific focus on ways to improve implementation and long-term sustainability of interventions. Frameworks are used to apply a theoretical underpinning to our understanding of why implementation of interventions succeed or fail. The Consolidated Framework for implementation Research (CFIR) composed of five domains was utilised as a theoretical framework to identify the facilitators and barriers that influence implementation. (13, 14) This framework, therefore, assists with bridging the gap between research and practice as well as reducing the challenges of implementing these interventions.(15)

To investigate how we can improve implementation and sustainability, we conducted this systematic review to synthesize various factors such as acceptability, settings, and potential adverse effects of interventions that improve oral health and related health behaviours of adults with SMD.

## METHODS

The research protocol was pre-registered and published registered with the Prospective Register of Systematic Reviews (PROSPERO) (reg. no: CRD42020202416).(16, 17) The review was reported according to Preferred Reporting Items for Systematic Reviews and Meta-Analyses (PRISMA) guidelines.(18)

### Search strategy

The search strategy (see Supplementary file.) was formulated and conducted with an information specialist within the research team. The following electronic databases: MEDLINE (Ovid), EMBASE (Ovid), CINAHL (Ebsco), APA PsycINFO (Ovid) and Scopus were searched for relevant qualitative, quantitative, and mixed method studies from inception to February 2023. Grey literature searches were conducted using Google Incognito and selected charity organization websites such as Fulfilling Lives, Crisis, Groundswell, which were informed by the expertise of the research team. Forward and backward citation search of the included studies were also conducted.

### Study selection

The search results were downloaded and deduplicated using EndNote 20.4.1 and the uploaded into Covidence, an online tool for managing the whole systematic review process.(19) Title, abstracts and full texts were independently screened by two reviewers. In the case of a discrepancy, consensus was reached after consultation with a third reviewer. Table 1 presents the inclusion criteria used during screening.

Table 1: *Eligibility Criteria used to select the studies*

|                     | <i>Eligibility Criteria</i>                                                                                                                                                                                                                                                                                                                                |
|---------------------|------------------------------------------------------------------------------------------------------------------------------------------------------------------------------------------------------------------------------------------------------------------------------------------------------------------------------------------------------------|
| <i>Population</i>   | Adults aged 18 or above, who experience SMD comprising of either homelessness (rough sleeping or other types of insecure accommodation), repeated offending or frequent substance use that co-occurs with homelessness or repeated offending.(17) Perspectives of staff who work with SMD groups and stakeholders such as policy makers and commissioners. |
| <i>Intervention</i> | Structural, community and individual level interventions.(17)                                                                                                                                                                                                                                                                                              |
| <i>Outcomes</i>     | Views from SMD groups and other stakeholders (policy makers, service providers, voluntary sector etc) about implementation and sustainability of interventions which include acceptability, content, settings, potential harms, uptake, and retention.(17)                                                                                                 |
| <i>Study Design</i> | Qualitative, quantitative, and mixed method studies                                                                                                                                                                                                                                                                                                        |

### Data extraction and quality appraisal

The data extraction and quality assessment for all the included studies were conducted by one reviewer and cross-checked by a second reviewer. Included studies were critically appraised to guide



1  
2  
3 how much confidences could be placed on the findings. Qualitative studies were appraised using the  
4 Critical Appraisal Skills Programme (CASP) qualitative checklist.(20) Quantitative studies were  
5 appraised using Cochrane’s Risk of bias for randomized control trials (RCTs).(21) For cross-sectional  
6 studies the National Institutes of Health (NIH) Study Quality Appraisal Tool was used.(22) Qualitative  
7 studies were rated as good, moderate or low quality, which was informed by a scoring system:  
8 scores 9–10 was high quality, 7.5–9 was moderate quality and <7.5 was low quality.(23) The scoring  
9 were informed by the quality checklists. Studies were not excluded based on their quality; poor  
10 reporting is not always reflective of poor methodology. (24) Studies were included on whether they  
11 contributed data relevant or novel data to this review.(24) Moreover, including all studies allowed  
12 gathering the global evidence related to the review questions.

### 20 **Data synthesis**

21  
22 Abstracts and data from the results of included studies were uploaded on to NVivo software (QSR  
23 International Pty Ltd., Melbourne, Australia Version 12, Release 1.6.1). Narrative synthesis was  
24 undertaken. Deductive codes based on the CFIR framework were used to initially code the findings  
25 followed by a three-step inductive synthesis process which involved coding the text, identifying the  
26 themes, and creating the subthemes. To maximise thematic yield, data reported in different papers  
27 but from the same study were individually coded. The developing themes and subthemes were  
28 discussed with the other reviewers and consensus was reached regarding these.

### 34 **Patient and public involvement**

35  
36 Patients and/or the public were not involved in the design, or conduct, or reporting, or  
37 dissemination plans of this research.

## 40 **RESULTS**

41  
42 Seventeen articles (twelve individual studies) met the inclusion criteria and were included in this  
43 systematic review. Figure 1 presents the PRISMA flowchart for included studies. Table 2 presents the  
44 descriptive summaries of the included studies. The papers were published between 1995 and 2022,  
45 and were related to interventions targeting oral health,(25, 26, 27, 28, 29, 30, 31, 32) substance  
46 use,(33, 34, 35, 36, 37, 38, 39) smoking and none on diet.

Table 2: Descriptive summaries of the seventeen included studies, including quality appraisal (High quality/moderate quality/low quality)

| No. | First Author (Year) and Country                     | Sample Size and Age of the participants                                        | Participant Group                                                                                        | Intervention Description                                                                                                                                                                            | Type of Research, Data Collection and Analysis                                               | Findings of the paper relevant to the review                                                                                                                                       | Quality Appraisal/ Risk of Bias  |
|-----|-----------------------------------------------------|--------------------------------------------------------------------------------|----------------------------------------------------------------------------------------------------------|-----------------------------------------------------------------------------------------------------------------------------------------------------------------------------------------------------|----------------------------------------------------------------------------------------------|------------------------------------------------------------------------------------------------------------------------------------------------------------------------------------|----------------------------------|
| 1.  | Beaton et al (2016) United Kingdom(25)              | N=20, age not mentioned                                                        | Health and social care workers                                                                           | Motivational interviewing to promote oral health among homeless populations ("Smile4Life programme")                                                                                                | Qualitative - Telephone interviews, framework approach                                       | Familiarity and good relationships between service providers and third sector organizations facilitated implementation whereas lack of resources and interest hindered it          | High quality                     |
| 2.  | Beaton et al (2018) United Kingdom (26)             | N= 9 observation sessions, age not mentioned                                   | Oral healthcare workers such as oral health educators and dental support workers                         | Motivational interviewing and tailored advice to promote oral health among the homeless population at different settings such as mobile dental units and homeless shelters ("Smile4Life programme") | Qualitative- Participant observation, content analysis                                       | Good working relationships between healthcare providers, patients and third sector organizations are important                                                                     | Moderate quality                 |
| 3.  | Beaton et al (2021) United Kingdom (27)             | N= 100, 16- 85 years                                                           | Oral health practitioners, third sector organization staff and local authority staff                     | Motivational interviewing and behavioural change techniques to promote oral health among the homeless ("Smile4Life programme")                                                                      | Quantitative- Questionnaire, K-R20, Exploratory factor analysis, multivariate path analysis. | Work practices such as positive attitudes and beliefs of the oral healthcare workers influence implementation                                                                      | Moderate/ Fair quality           |
| 4.  | Burnam et al (1995) United States of America(34)    | N= 276, mean age = 37 years                                                    | Homeless individuals with co-occurring substance and mental health issues                                | Social model of residential and non-residential programs providing integrated substance use and mental health services                                                                              | Quantitative- Structured interviews, regression analyses                                     | Retention levels were higher in the residential program compared to the non-residential one                                                                                        | Low quality (high Risk of Bias ) |
| 5.  | Coles et al (2013) United Kingdom(29)               | N= 14, age not mentioned                                                       | Healthcare workers from statutory and non-statutory organizations                                        | A framework that offers tailored oral health advice and signposts to relevant dental services. ("Something To Smile About")                                                                         | Qualitative- Focus groups, content analysis                                                  | Oral health knowledge among the healthcare workers improved but complex needs such as housing, employment etc must be addressed prior to oral health for successful implementation | Moderate quality                 |
| 6.  | Collins et al (2019) United States of America(35)   | N= 168, mean age= 47 years                                                     | Homeless individuals with alcohol use disorder                                                           | Non-abstinence treatment program that involves tracking of alcohol use, discussion of safe drinking practices and goal-oriented tasks. ("Harm Reduction Treatment for Alcohol HaRT-A")              | Quantitative-Questionnaires, content analysis                                                | It was positively viewed by the participants with high levels of retention and satisfaction                                                                                        | Good quality (low ROB)           |
| 7.  | Doughty et al (2020) United Kingdom(31)             | Service users – N= 353, age not mentioned<br>Service providers – not stated    | Homeless individuals and oral healthcare workers such as dentists, dental nurses, dental technicians etc | Denture service provided by Crisis at Christmas Dental Service and Den-tech to the homeless and vulnerably housed                                                                                   | Qualitative                                                                                  | Communication, timing, resources, and training were considered as areas that needed to be improved                                                                                 | Low quality                      |
| 8.  | Forchuk et al (2022) Canada(36)                     | Service users – N= 58, mean age = 52.5 years<br>Service providers – not stated | Homeless veterans with substance use problems and staff from housing services                            | Housing provided along with the peer support and harm reduction services to homeless veterans ("Housing First")                                                                                     | Qualitative - Interviews and focus groups, Thematic analysis                                 | Stable housing with harm reduction services was well received. Collaboration between mental health and addiction services should be considered for future services                 | Low quality                      |
| 9.  | Henderson et al (2004) United States of America(37) | Service users – N = 15<br>Service providers – not mentioned                    | Homeless veterans with substance/alcohol use and program staff such as                                   | Residential substance use treatment program that focuses on relapse prevention along with education and housing stability for homeless men                                                          | Qualitative - Surveys, direct observation and interviews, not stated                         | Majority of the participants provided positive feedback. Staffing issues such as training and                                                                                      | Moderate quality                 |

1  
2  
3  
4  
5  
6  
7  
8  
9  
10  
11  
12  
13  
14  
15  
16  
17  
18  
19  
20  
21  
22  
23  
24  
25  
26  
27  
28  
29  
30  
31  
32  
33  
34  
35  
36  
37  
38  
39  
40  
41  
42  
43  
44  
45  
46

| No. | First Author (Year) and Country                  | Sample Size and Age of the participants                                             | Participant Group                                                                                                          | Intervention Description                                                                                                                                                                 | Type of Research, Data Collection and Analysis                                               | Findings of the paper relevant to the review                                                                                                                      | Quality Appraisal/ Risk of Bias |
|-----|--------------------------------------------------|-------------------------------------------------------------------------------------|----------------------------------------------------------------------------------------------------------------------------|------------------------------------------------------------------------------------------------------------------------------------------------------------------------------------------|----------------------------------------------------------------------------------------------|-------------------------------------------------------------------------------------------------------------------------------------------------------------------|---------------------------------|
|     |                                                  |                                                                                     | healthcare workers and administrative staff                                                                                |                                                                                                                                                                                          |                                                                                              | competing workload were noted as drawbacks to the program                                                                                                         |                                 |
| 10. | Neale et al (2014) United Kingdom(33)            | Service users - N= 30, 23- 62 years<br>Service providers – N= 15, age not mentioned | Homeless individuals with substance use and mentors such as substance use workers, substance use managers and hostel staff | Computer assisted therapies using 20 different psychosocial intervention strategies to identify and reduce substance use based in hostels and homeless shelters (“Breaking Free Online”) | Qualitative- Interviews, Inductive coding and Framework approach                             | ‘Program features’, ‘mentor support’, ‘participant characteristics’ and ‘delivery context’ were noted as factors that lead to successful delivery.                | Moderate quality                |
| 11. | Paisi et al (2020) United Kingdom (32)           | Service users – N= 11, 20 -65 years<br>Service providers – N= 11, age not mentioned | Homeless individuals and the dental clinic staff members, support workers and volunteers.                                  | Community dental clinic that provides both regular and emergency treatments.                                                                                                             | Qualitative – semi structured interviews, reflective thematic analysis                       | Flexibility and the relationship between the patient and dental provider were highlighted as important features.                                                  | High quality                    |
| 12. | Pauly et al (2020) Canada(38)                    | N= 14, 29-61 years                                                                  | Homeless with illicit alcohol use                                                                                          | Non-residential community managed alcohol program which provides harm reduction strategies and peer support (“Canadian Managed Alcohol Program Study”)                                   | Qualitative- Semi- structured interviews, inductive coding and constant comparative analysis | Peer led program was successful as it facilitates capacity building, engagement, and empowerment                                                                  | Moderate quality                |
| 13. | Pratt et al (2019) United States of America(40)  | N= 40, 29-69 years                                                                  | Homeless with smoking and alcohol use                                                                                      | Nicotine replacement therapy and motivational interviewing/cognitive behavioural therapy to reduce smoking and alcohol use among the homeless (“Power To Quit 2”)                        | Qualitative- Interviews, social constructivist approach to grounded theory                   | Social (peer groups) and environmental (housing etc) factors impact cessation in homeless smokers                                                                 | High quality                    |
| 14. | Pratt et al (2022) United States of America (41) | N= 40, 29-70 years                                                                  | Homeless with smoking and alcohol use                                                                                      | Nicotine replacement therapy and motivational interviewing/cognitive behavioural therapy to reduce smoking and alcohol use among the homeless (“Power To Quit 2”)                        | Qualitative – Semi structured interviews, social constructivist approach to grounded theory  | Social pressure and shelter environment impact the intervention but the integrated treatment along with emotional support from the staff make it beneficial.      | High quality                    |
| 15. | Rash et al (2017) United States of America(39)   | N= 355, mean age = 37 years                                                         | Homeless with substance use                                                                                                | Behavioural intervention contingency management with the use of incentives such as vouchers and prizes delivered at local community clinics                                              | Quantitative-Adaptation of the Service Utilization Form, Multivariate analysis of variance.  | Retention was higher in groups that accessed the intervention compared to the standard arm of care                                                                | Moderate/fair quality           |
| 16. | Rodriguez et al (2019) United Kingdom(28)        | Service users - N= 13, 18- 22 years<br>Service providers – N= 5, age not mentioned  | Young homeless people and NGO practitioners                                                                                | Pedagogical workshops about oral health, mental health, substance misuse, diet etc to increase engagement and awareness                                                                  | Qualitative- Unstructured interviews and workshops, content analysis                         | Involvement of young people in co-designing an intervention facilitates engagement, trust building and increases health literacy                                  | High quality                    |
| 17. | Stormon et al (2018) Australia(30)               | N= 76, 41-60 years<br>Feedback – N=24                                               | Disadvantaged adults (clients of community organizations that utilize housing, employment and food services)               | Facilitated access pathway between homeless organizations and public dental services. Improving oral health by assessing dental needs, offering dental advice and dental appointments    | Quantitative-Questionnaire, Descriptive analysis, and Framework approach                     | Positive feedback by participants facilitated by the environment, clinical staff and flexibility. Attendance rates varied across the site but was generally high. | Fair/ moderate quality          |

1  
2  
3 SMD groups in the studies found in this review included young adults, single mothers, veterans, and  
4 adults with co-occurring conditions of severe mental illness. Based on the information reported in  
5 the studies, most of the interventions were focused on adults who were experiencing homelessness  
6 and substance use issues,(33, 34, 35, 36, 37, 38, 39, 40) but did not explicitly report on whether they  
7 included those who had repeated involvement with the criminal justice system.  
8  
9  
10

### 11 **Quality appraisal**

12  
13  
14 Of the twelve articles reporting qualitative findings, two were low quality due to lack of detailed  
15 findings and methodology not being reported adequately,(31, 36) five moderate quality,(26, 29, 33,  
16 37, 38) due to reporting bias and five high quality.(25, 28, 32, 40, 41) The risk of bias was assessed  
17 for the five articles reporting quantitative findings; among the two RCTs: one had a high risk of bias  
18 because of attrition and reporting bias,(34) and the other article had a low risk of bias,(35) the  
19 remaining three cross-sectional studies were of moderate quality.(27, 30, 39) The findings reported  
20 in this review are mostly from high or moderate quality articles, with the inclusion of insights from  
21 low quality articles employed strategically for completeness of reporting evidence available and to  
22 supplement findings from the adequately reported articles.  
23  
24  
25  
26  
27  
28  
29

### 30 **Synthesis of qualitative findings**

31  
32 Table 3 presents the themes, subthemes, codes, and quotes from individuals experiencing SMD and  
33 frontline staff and stakeholders.  
34  
35  
36  
37  
38  
39  
40  
41  
42  
43  
44  
45  
46  
47  
48  
49  
50  
51  
52  
53  
54  
55  
56  
57  
58  
59  
60

Table 3: Themes and subthemes from qualitative synthesis of findings along with the relevant codes and quotes

| Themes                | Subthemes                         | Codes                                                                                                           | Quote(s) – people with SMD; or frontline staff                                                                                                                                                                                                                                                                                                                                                                                                                                                                                                                                                                                                                                                                                                                                                                                                                                                                                                                                                                                                                                                                                                                                                                                                                                                                                                                                                                                                                                                                                                                  |
|-----------------------|-----------------------------------|-----------------------------------------------------------------------------------------------------------------|-----------------------------------------------------------------------------------------------------------------------------------------------------------------------------------------------------------------------------------------------------------------------------------------------------------------------------------------------------------------------------------------------------------------------------------------------------------------------------------------------------------------------------------------------------------------------------------------------------------------------------------------------------------------------------------------------------------------------------------------------------------------------------------------------------------------------------------------------------------------------------------------------------------------------------------------------------------------------------------------------------------------------------------------------------------------------------------------------------------------------------------------------------------------------------------------------------------------------------------------------------------------------------------------------------------------------------------------------------------------------------------------------------------------------------------------------------------------------------------------------------------------------------------------------------------------|
| Intervention settings | Physical settings                 | Housing stability, privacy, confidentiality                                                                     | <p><i>“This is kind of a stressful situation. People are homeless, being at the bottom of their luck, and—boom—and everything. So this is stress. What do you do? You drink, and you smoke, and that’s all that you can do, walking around here all day. Do you understand?”(person with SMD) (40)</i></p> <p><i>“But at the same time the addictions piece, especially in terms of stability, I’ve noticed a lot of the guys that because they are stable in our home, they may make the choice more often to say ‘I don’t feel like drinking tonight,’ so they don’t. They don’t have to get intoxicated to go to sleep in a shelter on a mat, they can choose not to drink and sometimes they do make that choice not to drink and just watch TV for the evening.”(frontline staff) (36)</i></p> <p><i>“If you went in and tried to do anything, people were behind you, over your shoulder, ‘what are you doing there’ And, you know, I didn’t what to discuss with people what I was doing, because they’d take the mick”(person with SMD) (33)</i></p>                                                                                                                                                                                                                                                                                                                                                                                                                                                                                                    |
|                       | Psychological aspects of settings | Communication, trust building, familiarity, mentorship, community, peer pressure, guidance, support, safe space | <p><i>“It’s not just about dental treatment, I think for a lot of people there is the fear of the dentist because when they do go, it’s because they need work done and they’re in pain, therefore they associate pain with the dentist.”(frontline staff) (29)</i></p> <p><i>“She’s not somebody that normally expresses much in a group, she’s quite a private person, so I thought it took quite a lot for her to open up, to trust, but I also appreciate the fact that she felt she was in a really good space that she could share that experience with the others and I felt that was really valuable for the rest of the group to hear that. I think this activity [the workshops] encourages people to talk about their own experiences”(frontline staff)(28)</i></p> <p><i>“Yes. A lot better off because... I’m not like, like when I’m here and I’m here with people that are drinking on programs like this and stuff like that I’ve noticed we’re all on the same level. We don’t care about the issues or problems, we just, you know, pitch together and do what we gotta do to get ourselves fixed and then from there if we can help other people, and people help other people...”(person with SMD) (38)</i></p> <p><i>“If there is nobody there and you’re just left to get on with it, it’s quite easy to skip things...I will just put that answer down, you know. But then when you know somebody is there and they are there for that specific reason, then it’s a lot easier to go through with things.”(person with SMD) (33)</i></p> |
|                       | Accessibility                     | Point of contact, space, geography                                                                              | <p><i>“We were put in the medical room along the corridor from the office, but there was no opportunity for practitioner 4 to approach any of the residents. We only saw service users if they specifically wanted to talk about their oral health or if they had walker past the room and wanted to see who we were.” (frontline staff) (26)</i></p> <p><i>“I’m from a very rural area, and we don’t really have any homelessness centres.” (person with SMD) (25)</i></p>                                                                                                                                                                                                                                                                                                                                                                                                                                                                                                                                                                                                                                                                                                                                                                                                                                                                                                                                                                                                                                                                                     |
| Intervention delivery | Improved Awareness                | Understandable, ideas, learning from one and another                                                            | <p><i>“Take things that people say and take it on board, and everything’s a learning curve, you learn things all the time... And I’d recommend that to anybody else who is homeless, just listen to other people, take on board what they’ve got to say, and accept the help that’s around you like the group activity [the workshops]”.(person with SMD) (28)</i></p> <p><i>“Especially when it was to do with what alcohol can do and what substances can do, I don’t think they realized how that affects their oral health, their ears pricked up when you said that” (frontline staff) (29)</i></p>                                                                                                                                                                                                                                                                                                                                                                                                                                                                                                                                                                                                                                                                                                                                                                                                                                                                                                                                                        |

| Themes                                       | Subthemes                                                  | Codes                                                                                                            | Quote(s) – people with SMD; or frontline staff                                                                                                                                                                                                                                                                                                                                                                                                                                                                                                                                                                                                                                                                                                                                                                                                                                                                                                                                                                     |
|----------------------------------------------|------------------------------------------------------------|------------------------------------------------------------------------------------------------------------------|--------------------------------------------------------------------------------------------------------------------------------------------------------------------------------------------------------------------------------------------------------------------------------------------------------------------------------------------------------------------------------------------------------------------------------------------------------------------------------------------------------------------------------------------------------------------------------------------------------------------------------------------------------------------------------------------------------------------------------------------------------------------------------------------------------------------------------------------------------------------------------------------------------------------------------------------------------------------------------------------------------------------|
|                                              | Resources                                                  | Workloads, stress, competing needs, volunteers, equipment, funds                                                 | <p><i>"I think he [client] felt that maybe I would have to sit with him again and, I don't know, maybe I should have sat him down and had a talk with him and I just haven't been able to"</i>(frontline staff) (33)</p> <p><i>"You feel like you're spinning so many plates, that you just can't possibly keep them all up in the air"</i> (frontline staff) (25)</p> <p><i>"we need to attract funding ... it's very difficult to encourage NHS England to commission outside of their routine, the existing contract doesn't favour patients with high treatment needs so we would need them to step outside of their comfort zone and commission something slightly different to what they're used to"</i>(frontline staff) (32)</p>                                                                                                                                                                                                                                                                           |
|                                              | Perceived risks while working with a vulnerable population | Safety, unpredictable, inappropriate behavior, challenges, relevant experience, confident, challenging behaviors | <p><i>"Practitioner 1 is confident and appears quite fearless, putting up with language/behaviour that would not be tolerated in a normal clinic."</i> (researcher observation notes of frontline staff) (26)</p> <p><i>"Initially we were thinking 'oh we need to make sure that we're not alone in the surgery at any point', and we had a panic alarm and things, we still have all that in place, but it's actually been fine."</i>(frontline staff) (32)</p>                                                                                                                                                                                                                                                                                                                                                                                                                                                                                                                                                  |
| Ways to enhance engagement and participation | Interest and motivation                                    | Complexity, fears, initiative, specific and complex needs, mixed opinions                                        | <p><i>"[Mentor] came in and said 'I'm going home, have you done much?' And I said, 'I couldn't get back on, you know'. And she just took it [the laptop]. I don't know if she was fed up with me or whatever, but she never spoke about it again and I never mentioned it again."</i>(person with SMD) (33)</p> <p><i>"The oral health team do not seem bothered to recruit any patients, even if that means sitting waiting with nothing to do—the feeling seems to be that if a patient wants to be seen then they will come to the MDU."</i>(researcher observation notes of frontline staff) (26)</p> <p><i>"My goal is to quit within a month or two months. I talked to a couple of people. 'It ain't going to happen.' I said, 'well if you set your mind to certain things, you can do this."</i>(person with SMD) (40)</p> <p><i>"I think it's good. It made me feel like I had something to do or like I had a purpose. You know what I mean, not a purpose but it wasn't like the homeless"</i>(41)</p> |
|                                              | Adapt to specific circumstances                            | Context, tailored to the needs of the individual, personalized care                                              | <p><i>"People getting through the door, they might not have a roof, might not have any money, might have major drug and alcohol issues, might be threatened with violence, the last thing they want to talk about is their teeth."</i>(frontline staff) (29)</p> <p><i>"we call these people chaotic and that's a bit judgmental, they are actually setting priorities, they've got so much going on in their lives that it [oral health] just falls of their list of priorities, they're saying 'it's my priority to find somewhere to sleep tonight' ... The time that you catch people' was therefore identified as 'really important'."</i>(frontline staff) (32)</p>                                                                                                                                                                                                                                                                                                                                          |
|                                              | Constant support                                           | Long term care, advice, support                                                                                  | <p><i>"About three or four in the morning and I feel like upset then...I can come down and use the program, which is quite good because that way I can put stuff that is all jumbled up in my head down in a way that makes sense and it kind of makes you see that things aren't quite so bad as they seem."</i>(person with SMD) (33)</p> <p><i>"At the stage of having goals, an action plan and were working through that . . . but for some homeless people who are nowhere ready, you can make an average of seven appointments before they will turn up once, it's just where your client is at."</i>(frontline staff) (29)</p>                                                                                                                                                                                                                                                                                                                                                                             |

1  
2  
3 Synthesis of twelve papers with qualitative findings,(25, 26, 28, 29, 31, 32, 33, 36, 37, 38, 40, 41)  
4 identified three overarching themes in relation to the aims of this review. The three themes are: 1)  
5 Intervention settings, 2) Intervention delivery and 3) ways to enhance engagement and  
6 participation.  
7  
8  
9

### 10 **Theme 1: Intervention settings**

11  
12  
13 Eleven papers identified issues related to the settings of interventions which can play a role in the  
14 delivery of interventions targeting oral health, substance use and smoking.(25, 26, 27, 28, 32, 33, 36,  
15 37, 38, 40, 41)  
16

#### 17 *Physical settings*

18  
19  
20  
21 Physical settings involved the environment in which the intervention took place. The wider physical  
22 environment has been found to have an impact on the intervention experience,(41) with privacy  
23 being the key factor for improving physical settings.(32, 33, 41) Communal homeless shelters and  
24 busy teaching hospitals lack the space and privacy to deliver interventions involving discussions  
25 about difficult and sensitive topics.(32, 33, 41) Contrastingly, stable housing with the necessary  
26 privacy allowed people experiencing SMD to focus on their recovery journey, whilst also creating a  
27 space in which residents could spend time away from peers who were sometimes perceived as  
28 having a negative peer group influence.(36, 40)  
29  
30  
31  
32  
33

#### 34 *Psychological aspects of settings*

35  
36  
37 Psychological aspects related to the less visible parts of the interventions were identified across ten  
38 papers.(25, 26, 28, 29, 32, 33, 37, 38, 40, 41) Firstly, it was reported that relationships between  
39 people experiencing SMD and service providers played a vital part in the delivery of interventions.  
40 Through good communication,(26, 28, 32, 41) trust building,(28, 29, 32, 41) familiarity of working  
41 with a vulnerable population,(25, 32) and mentorship,(33, 37) interventions were able to form a  
42 'safe and respectable environment'.(28, 32, 37, 41) Secondly, papers discussed the importance of  
43 peer support as a way of increasing the effectiveness of interventions.(32, 37, 38) There were also  
44 reports of the impact negative peer influence could have on the recovery process. For example,  
45 smoking and drinking were linked to socializing with others, which could increase the urge to smoke  
46 or drink.(40, 41)  
47  
48  
49  
50  
51  
52  
53

#### 54 *Accessibility*

55  
56  
57 Accessibility of interventions was one of the factors found to be important related to  
58 implementation of interventions among people experiencing SMD.(25, 26, 32, 41) Firstly, accessible  
59  
60

1  
2  
3 and spacious meeting points within the services were reported to help with their participation in the  
4 intervention, especially in the case of oral health interventions that were delivered either in a  
5 community setup (open space) or a mobile dental van .(26) Secondly, geographical proximity could  
6 act as a barrier as rural and remote areas lack the facilities and resources, which could influence the  
7 access of people experiencing SMD.(25, 32) Lastly, it was reported that access could become an  
8 issue when service users move to more stable housing as weather conditions, distance, work and  
9 other appointments tend to make it challenging to attend the intervention sessions.(41)  
10  
11  
12  
13  
14

## 15 **Theme 2: Intervention delivery**

16  
17  
18 Nine papers discussed aspects such as information availability, resources and perceived risks of  
19 working with a vulnerable population that could be important for roll out and delivery of  
20 interventions addressing oral health, smoking and substance use.(25, 26, 28, 29, 31, 32, 33, 37, 41)  
21  
22

### 23 *Improved Awareness*

24  
25  
26 Awareness and information availability were discussed in papers focusing on improving oral health,  
27 smoking and alcohol use.(28, 29, 32, 41) Sharing information between service providers and SMD  
28 groups was identified as an important issue across the papers as it created opportunities to promote  
29 involvement and behavior change.(28, 29, 41) It was reported that easily understandable  
30 information encouraged people experiencing SMD to view healthier behaviors as important (e.g.  
31 tooth brushing) and helped to signpost them to necessary services.(28, 41) Clear and simple  
32 explanations of treatment options available was seen to help them in decision-making.(32) Service  
33 providers also felt that they learned more about healthy behaviors and were able to pass their newly  
34 gained knowledge to their clients.(29)  
35  
36  
37  
38  
39  
40

### 41 *Resources*

42  
43  
44 Five papers discussed the importance of having necessary resources to enable interventions to run  
45 efficiently and effectively.(25, 31, 32, 33, 37) The majority of these highlighted the importance of  
46 distribution of workloads among staff because of difficulties in implementing interventions with  
47 competing duties and work within the organizations.(25, 33, 37) Funding and resources such as  
48 volunteers and materials were identified in oral health interventions as an important issue that  
49 impacts implementation and long-term sustainability.(31, 32)  
50  
51  
52  
53

### 54 *Perceived risks working with a vulnerable population*

55  
56  
57 Papers reported on the perceived risks of delivering interventions to vulnerable populations as  
58 challenging at times by service providers.(25, 26, 32) There were concerns about safety of service  
59  
60



1  
2  
3 providers while interacting with clients who were seen to be “unpredictable”. The need for training  
4 and being better equipped to work in this environment and setting boundaries between service  
5 providers and clients was repeatedly mentioned by service providers.(25, 26, 32, 37) The papers also  
6 highlighted the importance of training opportunities that provide service providers with the  
7 necessary skills to handle volatile and difficult situations.(25, 37)  
8  
9

### 12 **Theme 3: Ways to enhance participation and engagement**

14 Ten papers identified factors such as interest and motivation levels, adaptability, and long-term  
15 support that could help to improve outcomes and create sustainable interventions by enhancing  
16 engagement and participation.(25, 26, 28, 29, 31, 32, 33, 37, 40, 41)  
17  
18

#### 20 *Interest and motivation*

22 Nine papers highlighted that the interest and motivation levels of both staff supporting SMD groups  
23 and people experiencing SMD play an important role in the implementation of interventions.  
24 Disinterest was sometimes observed amongst service providers, due to concerns about the  
25 complexity of delivering the intervention,(25, 29, 31) lack of engagement with third sector  
26 organizations,(26) poor uptake of the intervention by the target populations,(25, 29, 31) and  
27 preconceived notions of improper behaviour by SMD groups.(41) Interestingly, interventions were  
28 met with similar feelings of indifference by people experiencing SMD if the intervention did not  
29 address their specific and complex needs such as housing and financial problems.(25, 26, 32) Two  
30 papers on oral health interventions found that younger adults and families with children were more  
31 eager to engage compared to single men.(28, 29) Papers discussing the same smoking intervention  
32 illustrated that an awareness of health benefits and risks played a part in motivating people in  
33 engaging with the intervention.(40, 41)  
34  
35

#### 43 *Adapting to specific circumstances*

45 Adaptability of interventions was noted as an essential feature among four papers.(29, 32, 33, 40)  
46 Tailoring the interventions to address their specific needs at the time such as housing and  
47 employment was noted to increase participation and better outcomes.(29, 40) Service users of a  
48 community dental service also suggested flexible and longer dental appointments would be helpful  
49 and in the long-term these adaptations would help reduce missed appointments.(32) Another paper  
50 reported that people experiencing SMD were keen to have more face to face interactions rather  
51 than digital, which highlights the drive to more personalized care.(33)  
52  
53

#### 58 *Long term support*

1  
2  
3 Four papers identified sustained and long-term support as a factor that could contribute towards  
4 better intervention outcomes.(29, 32, 33, 37) Service providers expressed a need for interventions  
5 which allowed people experiencing SMD to continue with services/programmes despite missing  
6 appointments or not completing treatment within the required delivery timeframe especially  
7 because of the transitional nature of SMD groups.(32, 33) Similarly, for a substance reduction  
8 intervention, a preference for a long-term intervention, that allowed and supported them to  
9 gradually integrate into their new stage of their lives.(33, 37) Two papers on oral health  
10 interventions suggested that drop-in services offered flexibility in seeking advice or seeing a  
11 practitioner and helped to reduce anxiety surrounding accessing treatment for dental health.(29, 32)

### 19 **Synthesis of quantitative findings related to retention and implementation**

20  
21 Four papers reported quantitative findings on retention and program attendance,(30, 34, 35, 39) as  
22 indicators of uptake and sustained implementation of interventions.

23  
24  
25 Three papers on substance use interventions reported high levels of retention in their intervention  
26 groups.(34, 35, 39) Two studies among them delivered the interventions along with housing services  
27 but the findings were mixed and limited on whether retention was significantly associated with the  
28 housing services or not. (34, 35, 39)

29  
30  
31  
32  
33 There was no difference in the attendance levels in the studies related to substance use  
34 interventions.(34, 35) The attendance level for an oral health promotion intervention delivered in  
35 community settings was high (85%), however it varied across community centers and was  
36 dependent on timing of appointment and dental treatments offered. More non-attendance seen for  
37 afternoon appointments and complex dental treatments (e.g. surgical and prosthodontic  
38 treatments).(30)

39  
40  
41  
42  
43 Additionally, workplace beliefs and practices amongst service providers such as knowledge,  
44 intention and goals, were reported to influence implementation behaviors.(27)

### 47 **DISCUSSION**

48  
49  
50 This review synthesized different factors that could influence the implementation and sustainability  
51 of interventions related to improving oral health and related health behaviors of people  
52 experiencing SMD. Evidence suggested that psychological aspects of intervention settings such as  
53 building trust and communication form an integral part in the creating a safe environment and that  
54 these are just as essential as the structural components of settings such as physical environment.  
55 Review findings further suggest that adequate staff capacity, funding and equipment would ease the  
56 delivery of interventions by reducing the immense pressure faced by service providers supporting  
57  
58  
59  
60

1  
2  
3 the interventions. It was also suggested that implementation is dependent on the interest and  
4 motivation of not only people experiencing SMD but also on that of service providers in delivering  
5 difficult and complex interventions.  
6  
7

8  
9 Most of the included studies were related to oral health and substance use (drug and alcohol). There  
10 was a lack of evidence on diet and smoking interventions among this population. Previous evidence  
11 has shown that tobacco use and poor diet, often due to limited choice available while experiencing  
12 homelessness and related disadvantages, result in a range of adverse short term (nutritional  
13 deficiencies) and long term health outcomes (cancer, diabetes, heart disease).(42, 43, 44) Food  
14 insecurity is often linked to elevated tobacco use, mental health issues and an increased risk of  
15 substance misuse.(45, 46, 47)  
16  
17

18  
19 While most of the papers mainly focused on the perspectives of people experiencing SMD, the  
20 limited data from service providers brought to light some of the challenges faced during  
21 implementation. This supports the notion that intervention implementation needs the co-ordination  
22 and collective effort of everyone involved. All the interventions included were designed focussing on  
23 service provision,(25, 26, 27, 28, 30, 31, 32, 33, 34, 35, 37, 38, 39, 40, 41, 48) except for one study  
24 which focussed on a training intervention for service providers (29).Limited evidence was available  
25 on the long-term sustainability of interventions, which highlights another evidence gap that needs to  
26 be addressed.  
27  
28

29  
30 Our review findings suggest that the retention in interventions may depend on the type of treatment  
31 offered, which at times can be influenced by the availability of housing provision. Timing and type of  
32 treatment may also influence attendance rates; for instance, morning appointments might be more  
33 beneficial, especially for individuals struggling with alcohol addiction, as they may be less intoxicated  
34 compared to later in the day. Our review findings also complement our systematic review about the  
35 effectiveness of interventions that improve oral health and related health behaviors in SMD groups –  
36 the effectiveness review found that interventions that integrated health with the individual's wider  
37 needs (for e.g. housing, employment, mental health) were more effective than usual care.(49) The  
38 findings we have are very limited regarding retention and attendance, more effort needs to be taken  
39 to understand how to improve reach and retention among SMD groups so that they can access and  
40 use the interventions efficiently.  
41  
42

43  
44 A systematic review on access to dental care among individuals experiencing homelessness in the UK  
45 identified similar findings around awareness, accessibility and organizational issues (lack of financial  
46 resources and collaboration between sectors) having an influence on implementation.(50) This was  
47 also similarly identified in another review on smoking cessation among homeless populations in  
48  
49  
50  
51  
52  
53  
54  
55  
56  
57  
58  
59  
60

1  
2  
3 high-income countries.(51) The importance of continued engagement in services was highlighted in  
4 a review on substance use support for young people (ages 12 to 24) experiencing homelessness,  
5 which was also reflected in our findings.(52) Existing literature on interventions targeting health  
6 conditions such as HIV and Hepatitis C in this population have shown that improved health outcomes  
7 are linked to increased awareness, establishment of positive relationships with service providers and  
8 integrated treatment involving other health behaviours.(53, 54, 55)  
9  
10  
11  
12

13  
14 Some findings from our review on aspects related to intervention settings, and intervention delivery  
15 aligned with CFIR constructs of Inner and Outer settings domains.(14) Subthemes in our findings on  
16 ways to enhance engagement, aligns with both Individuals and Implementation process  
17 domains.(14) The use of CFIR framework helps us understand the impact of intervention settings,  
18 delivery methods and engagement on the implementation process. It also provides a comprehensive  
19 approach for guiding the development of interventions targeting SMD groups and improving their  
20 efficacy in practical settings.  
21  
22  
23  
24  
25

### 26 **Strengths and Limitations**

27  
28 This systematic review is novel in that it assesses the implementation and sustainability of  
29 interventions on oral health together with co-occurring and related health behaviors in people  
30 experiencing SMD. It addresses an evidence gap on interventions targeting these health challenges  
31 and identifies ways to overcome implementation issues faced by these specific interventions.  
32 Another strength of this review lies in its comprehensive search strategy and use of a published tool  
33 (i.e. CFIR) to make sense of the results. It also highlights gaps in the evidence base on interventions  
34 related to diet, as well as studies that include repeat offenders. However, the confidence in the  
35 evidence from this review is limited as most of the papers were of moderate quality. Studies lacked  
36 detailed data collection methods and standardized evaluations which influenced their quality.  
37 Another limitation of this work is that intersectionality was not considered explicitly during the  
38 analysis of the data. Furthermore, the findings may not be generalizable to all contexts since the  
39 included papers were from high-income countries.  
40  
41  
42  
43  
44  
45  
46  
47  
48

### 49 **Implications**

50  
51 These findings offer valuable insights for enhancing existing interventions by paying attention to  
52 settings, delivery, and engagement opportunities. Evidence from this review points to the need for  
53 additional research on interventions targeting smoking and diet. These areas hold significant value  
54 due to their direct links with general and oral health. It is also important for interventions to address  
55 not only individual behaviours but also overlapping behaviours of substance use, smoking and poor  
56  
57  
58  
59  
60

1  
2  
3 diet. This could help reduce the strain on resources and improve engagement. Furthermore, higher  
4 quality research that focuses more on sustainability and intersectionality is warranted to further  
5 investigate and refine interventions focused on SMD groups.  
6  
7  
8  
9  
10

### 11 **Author Contributions**

12  
13 Conceptualization: SER, EK, EAA, CB, RGW, ECJ, LJM, FB, DC, DL, MP, FFS; methodology: SER, DAJ,  
14 LJM, EAA, ECJ, CR, EK, DC, FB; draft preparation: SER, DAJ, EAA; writing - review and editing all;  
15 funding acquisition: SER, EK, FB, CB, RGW, DC, DL, MP, FFS.  
16  
17  
18

### 19 **Ethical approval**

20  
21 None sought.  
22  
23

### 24 **Data Availability Statement**

25  
26 No data are available.  
27  
28

### 29 **Funding Statement**

30  
31 This project is funded by the National Institute for Health and Care Research (NIHR) Policy Research  
32 Programme (NIHR200415). EAA was supported by the National Institute for Health and Care  
33 Research (NIHR) School for Public Health Research (SPHR) Pre-doctoral Fellowship, Grant Reference  
34 Number PD-SPH-2015. EK is supported by an NIHR Senior Investigator award and directs the NIHR  
35 funded Applied Research Collaboration North East and North Cumbria.  
36  
37  
38

### 39 **Conflicts of Interest**

40  
41  
42 The authors declare no conflict of interest. The funders had no role in the design of the study; in the  
43 collection, analyses, or interpretation of data; in the writing of the manuscript, or in the decision to  
44 publish the results.  
45  
46  
47

### 48 **Word Count**

49  
50 3329 words  
51  
52

53 **Figure 1:** *PRISMA Flowchart for the search results.*  
54  
55  
56  
57  
58  
59

### 60 **References:**

1. Bramley G, Fitzpatrick S, Edwards J, et al. Hard edges: mapping severe and multiple disadvantage in England. 2015.
2. Sandu RD. Defining severe and multiple disadvantage from the inside: Perspectives of young people and of their support workers. *Journal of Community Psychology*. 2021;49(5):1470-86.
3. Rae BE, Rees S. The perceptions of homeless people regarding their healthcare needs and experiences of receiving health care. *Journal of Advanced Nursing*. 2015;71(9):2096-107.
4. Conte M, Broder HL, Jenkins G, et al. Oral Health, Related Behaviors and Oral Health Impacts Among Homeless Adults. *J Public Health Dent*. 2006;66(4):276-8.
5. Hertzberg D, Boobis S. Unhealthy State of Homelessness 2022: Findings from the Homeless Health Needs Audit. 2022.
6. Groundswell. Healthy Mouths: A peer-led health audit on the oral health of people experiencing homelessness. London Groundswell; 2017.
7. Evans NS, Dowler EA. Food, health and eating among single homeless and marginalized people in London. *Journal of Human Nutrition and Dietetics*. 1999;12(3):179-99.
8. Sheiham A. Oral health, general health and quality of life. *SciELO Public Health*; 2005. p. 644-.
9. Wiecha JL, Dwyer JT, Dunn-Strohecker M. Nutrition and health services needs among the homeless. *Public Health Rep*. 1991;106(4):364-74.
10. Beaton L, Humphris G, Rodriguez A, et al. Community-based oral health interventions for people experiencing homelessness: a scoping review. *Community Dent Health*. 2020;37(2):150-60.
11. Hwang SW, Tolomiczenko G, Kouyoumdjian FG, et al. Interventions to improve the health of the homeless: a systematic review. *American journal of preventive medicine*. 2005;29(4):311-. e75.
12. Speirs V, Johnson M, Jirojwong S. A systematic review of interventions for homeless women. *Journal of Clinical Nursing*. 2013;22(7-8):1080-93.
13. Damschroder LJ, Aron DC, Keith RE, et al. Fostering implementation of health services research findings into practice: a consolidated framework for advancing implementation science. *Implementation Science*. 2009;4(1):50.
14. Damschroder LJ, Reardon CM, Widerquist MAO, et al. The updated Consolidated Framework for Implementation Research based on user feedback. *Implementation Science*. 2022;17(1):75.
15. Shelton RC, Cooper BR, Stirman SW. The Sustainability of Evidence-Based Interventions and Practices in Public Health and Health Care. *Annual Review of Public Health*. 2018;39(1):55-76.
16. McGowan L, Joyes E, Adams E, et al. Systematic review of oral health and related health behaviour interventions in adults with severe and multiple disadvantages. PROSPERO. 2020.
17. McGowan LJ, Joyes EC, Adams EA, et al. Investigating the Effectiveness and Acceptability of Oral Health and Related Health Behaviour Interventions in Adults with Severe and Multiple Disadvantage: Protocol for a Mixed-Methods Systematic Review. *Int J Environ Res Public Health*. 2021;18(21).
18. Page MJ, Moher D, Bossuyt PM, et al. PRISMA 2020 explanation and elaboration: updated guidance and exemplars for reporting systematic reviews. *BMJ*. 2021;372:n160.

19. Covidence. Covidence Systematic Review Software.
20. Programme. CAS. CASP Qualitative Checklist 2022 [Available from: <https://casp-uk.net/casp-tools-checklists>].
21. Higgins JP, Thomas J, Chandler J, et al. Cochrane handbook for systematic reviews of interventions: John Wiley & Sons; 2019.
22. National Heart LaBI. Study quality assessment tool for observational and cross sectional studies 2021 [Available from: <https://www.nhlbi.nih.gov/health-topics/study-quality-assessment-tools>].
23. Butler A, Hall H, Copnell B. A Guide to Writing a Qualitative Systematic Review Protocol to Enhance Evidence-Based Practice in Nursing and Health Care. *Worldviews Evid Based Nurs*. 2016;13(3):241-9.
24. Saini M, Shlonsky A. *Systematic synthesis of qualitative research*: OUP USA; 2012.
25. Beaton L, Freeman R. Oral health promotion and homelessness: A theory-based approach to understanding processes of implementation and adoption. *Health Education Journal*. 2016;75(2):184-97.
26. Beaton L, Anderson I, Humphris G, et al. Implementing an Oral Health Intervention for People Experiencing Homelessness in Scotland: A Participant Observation Study. *Dent J (Basel)*. 2018;6(4).
27. Beaton L, Humphris G, Rodriguez A, et al. Implementing the Smile4life intervention for people experiencing homelessness: a path analytical evaluation. *BMC Oral Health*. 2021;21(1):383.
28. Rodriguez A, Beaton L, Freeman R. Strengthening Social Interactions and Constructing New Oral Health and Health Knowledge: The Co-design, Implementation and Evaluation of A Pedagogical Workshop Program with and for Homeless Young People. *Dent J (Basel)*. 2019;7(1).
29. Coles E, Watt C, Freeman R. 'Something to Smile About': An evaluation of a capacity-building oral health intervention for staff working with homeless people. *Health Education Journal*. 2012;72(2):146-55.
30. Stormon N, Pradhan A, McAuliffe A, et al. Does a facilitated pathway improve access to dental services for homeless and disadvantaged adults? Evaluation and program planning. 2018;71:46-50.
31. Doughty J, Johnson A, Tatari A, et al. A pilot denture service collaboration between Den-Tech denture charity and Crisis at Christmas Dental Service (CCDS): A Plan-Do-Study-Act analysis. *British Dental Journal*. 2020;228(3):183-90.
32. Paisi M, Baines R, Worle C, et al. Evaluation of a community dental clinic providing care to people experiencing homelessness: A mixed methods approach. *Health Expectations*. 2020;23(5):1289-99.
33. Neale J, Stevenson C. Positive and negative features of a computer assisted drug treatment program delivered by mentors to homeless drug users living in hostels. *Journal of substance abuse treatment*. 2014;47(4):258-64.
34. Burnam MA, Morton SC, McGlynn EA, et al. An experimental evaluation of residential and nonresidential treatment for dually diagnosed homeless adults. *J Addict Dis*. 1995;14(4):111-34.
35. Collins SE, Clifasefi SL, Nelson LA, et al. Randomized controlled trial of harm reduction treatment for alcohol (HaRT-A) for people experiencing homelessness and alcohol use disorder. *Int J Drug Policy*. 2019;67:24-33.

- 1
- 2
- 3
- 4 36. Forchuk C, Richardson J, Atyeo H, et al. Qualitative findings from a Housing First
- 5 evaluation project for homeless Veterans in Canada. *Journal of Military, Veteran and Family*
- 6 *Health*. 2022;8(2):27-38.
- 7 37. Henderson PM. Program evaluation of a long-term substance abuse treatment
- 8 program for homeless men: Spalding University; 2003.
- 9 38. Pauly B, King V, Smith A, et al. Breaking the cycle of survival drinking: insights from a
- 10 non-residential, peer-initiated and peer-run managed alcohol program. *Drugs: Education,*
- 11 *Prevention and Policy*. 2021;28(2):172-80.
- 12 39. Rash CJ, Alessi SM, Petry NM. Substance abuse treatment patients in housing
- 13 programs respond to contingency management interventions. *J Subst Abuse Treat*.
- 14 2017;72:97-102.
- 15 40. Pratt R, Pernat C, Kerandi L, et al. "It's a hard thing to manage when you're
- 16 homeless": the impact of the social environment on smoking cessation for smokers
- 17 experiencing homelessness. *BMC Public Health*. 2019;19(1):1-8.
- 18 41. Pratt R, Xiong S, Kmiecik A, et al. The implementation of a smoking cessation and
- 19 alcohol abstinence intervention for people experiencing homelessness. *BMC public health*.
- 20 2022;22(1):1260.
- 21 42. Baggett TP, Singer DE, Rao SR, et al. Food Insecurity and Health Services
- 22 Utilization in a National Sample of Homeless Adults. *Journal of General Internal Medicine*.
- 23 2011;26(6):627-34.
- 24 43. Fallaize R, Seale JV, Mortin C, et al. Dietary intake, nutritional status and mental
- 25 wellbeing of homeless adults in Reading, UK. *British Journal of Nutrition*. 2017;118(9):707-
- 26 14.
- 27 44. Okuyemi KS, Caldwell AR, Thomas JL, et al. Homelessness and Smoking Cessation:
- 28 Insights from Focus Groups. *Nicotine Tob Res*. 2006;8(2):287-96.
- 29 45. Langnäse K, Müller MJ. Nutrition and health in an adult urban homeless population
- 30 in Germany. *Public Health Nutrition*. 2001;4(3):805-11.
- 31 46. Knudsen HK. Implementation of smoking cessation treatment in substance use
- 32 disorder treatment settings: a review. *The American Journal of Drug and Alcohol Abuse*.
- 33 2017;43(2):215-25.
- 34 47. Kim JE, Flentje A, Tsoh JY, et al. Cigarette Smoking among Women Who Are
- 35 Homeless or Unstably Housed: Examining the Role of Food Insecurity. *J Urban Health*.
- 36 2017;94(4):514-24.
- 37 48. Beaton L, Anderson I, Humphris G, et al. Implementing an Oral Health Intervention
- 38 for People Experiencing Homelessness in Scotland: A Participant Observation Study.
- 39 *Dentistry Journal*. 2018;6(4):68.
- 40 49. McGowan LJ, John DA, Kenny RPW, et al. Interventions to improve oral health and
- 41 related health behaviours of substance use, smoking and diet in people with severe and
- 42 multiple disadvantage: a systematic review of effectiveness and cost-effectiveness. 2023.
- 43 50. Paisi M, Kay E, Plessas A, et al. Barriers and enablers to accessing dental services for
- 44 people experiencing homelessness: A systematic review. *Community dentistry and oral*
- 45 *epidemiology*. 2019;47(2):103-11.
- 46 51. Soar K, Dawkins L, Robson D, et al. Smoking amongst adults experiencing
- 47 homelessness: a systematic review of prevalence rates, interventions and the barriers and
- 48 facilitators to quitting and staying quit. *Journal of Smoking Cessation*. 2020;15(2):94-108.
- 49 52. Xiang X. A review of interventions for substance use among homeless youth.
- 50 *Research on Social Work Practice*. 2013;23(1):34-45.
- 51
- 52
- 53
- 54
- 55
- 56
- 57
- 58
- 59
- 60



- 1  
2  
3 53. Nyamathi A, Kennedy B, Branson C, et al. Impact of Nursing Intervention on  
4 Improving HIV, Hepatitis Knowledge and Mental Health Among Homeless Young Adults.  
5 Community Mental Health Journal. 2013;49(2):178-84.  
6  
7 54. Young SD, Rice E. Online social networking technologies, HIV knowledge, and sexual  
8 risk and testing behaviors among homeless youth. AIDS and Behavior. 2011;15:253-60.  
9  
10 55. Slesnick N, Kang MJ. The impact of an integrated treatment on HIV risk behavior  
11 among homeless youth: a randomized controlled trial. Journal of behavioral medicine.  
12 2008;31:45-59.  
13  
14  
15  
16  
17  
18  
19  
20  
21  
22  
23  
24  
25  
26  
27  
28  
29  
30  
31  
32  
33  
34  
35  
36  
37  
38  
39  
40  
41  
42  
43  
44  
45  
46  
47  
48  
49  
50  
51  
52  
53  
54  
55  
56  
57  
58  
59  
60

For peer review only

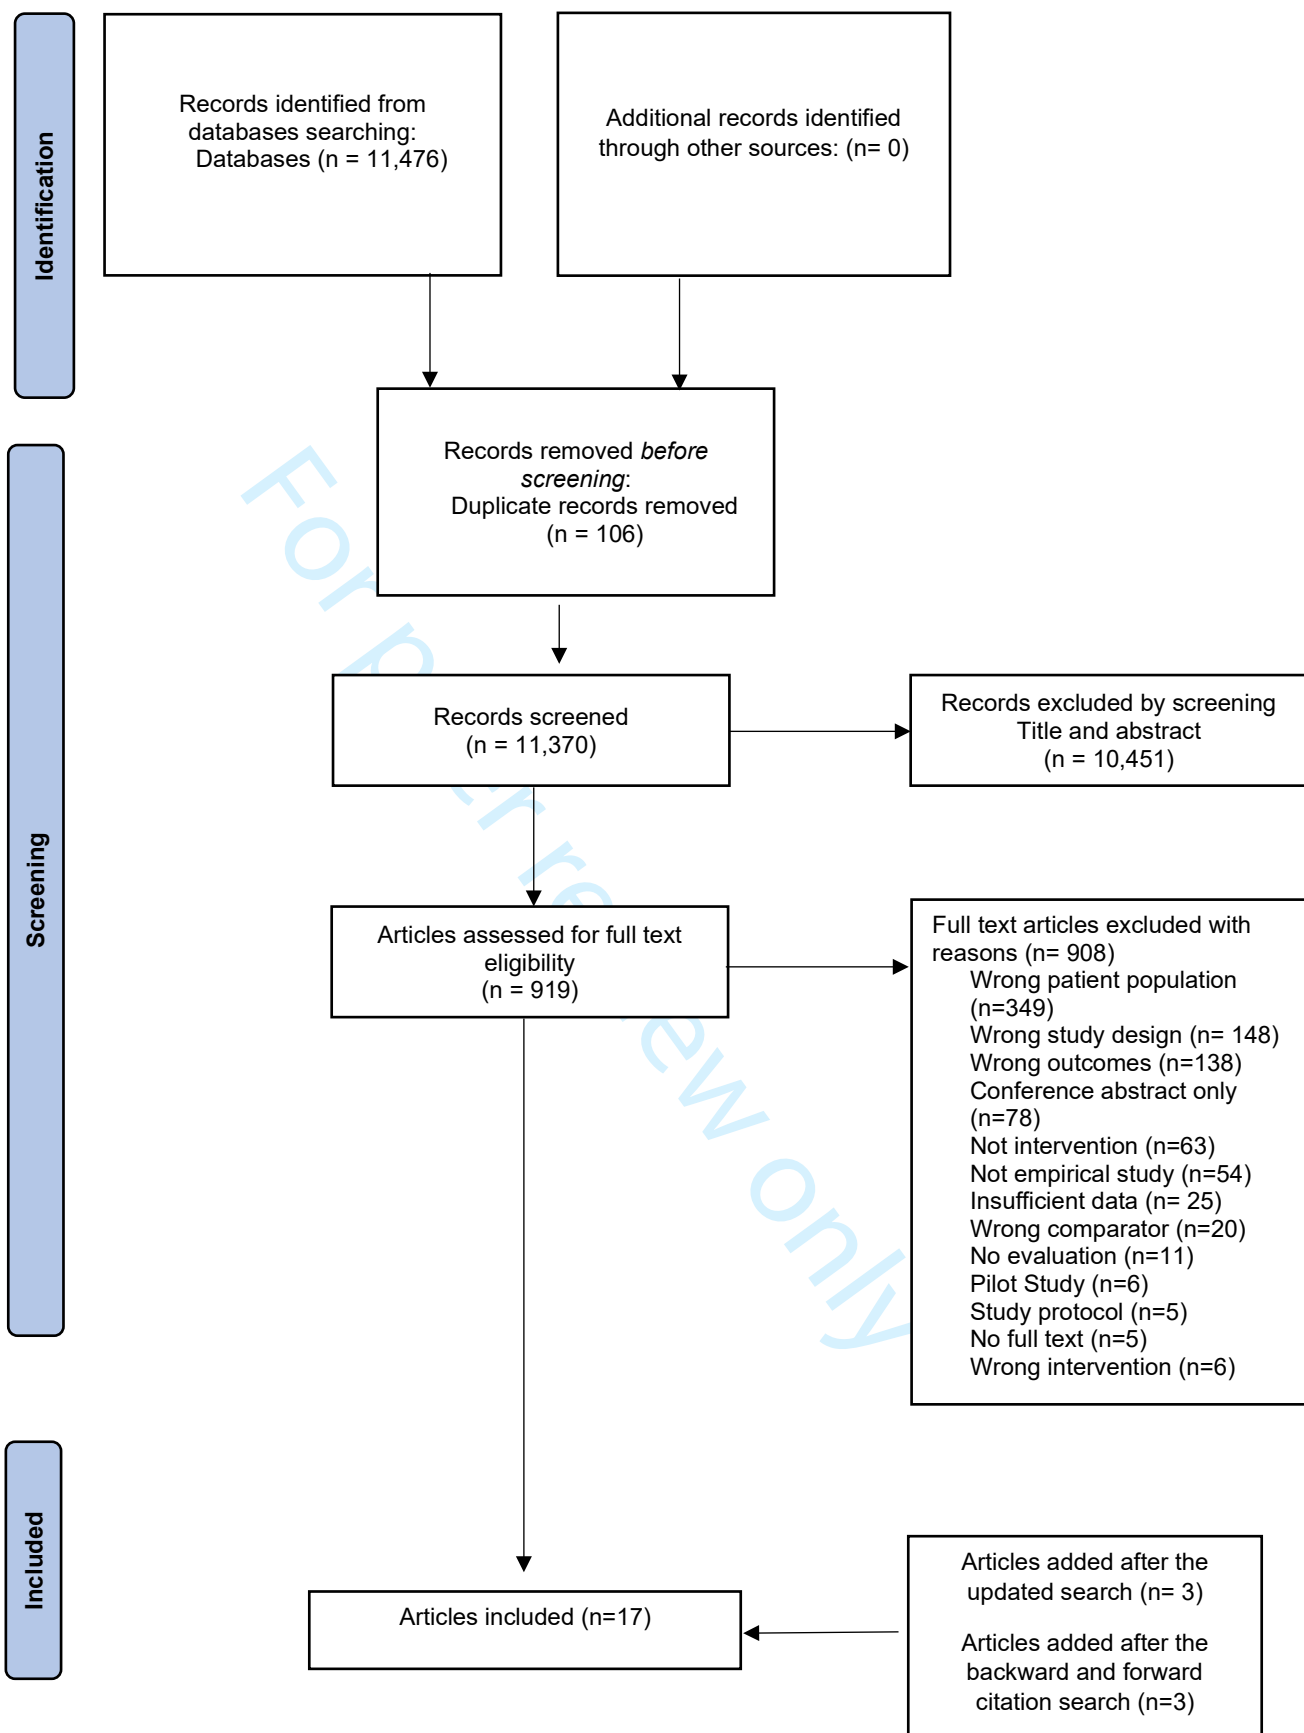

## Search Strategy

Database(s): Ovid MEDLINE(R) and Epub Ahead of Print, In-Process & Other Non-Indexed Citations, Daily and Versions(R) 1946 to July 14, 2020

Search Strategy:

| #  | Searches                                                                                                                                                                                                                                                                                                                                                                                                                                                                                                                                                                                                                                                                                                          | Results |
|----|-------------------------------------------------------------------------------------------------------------------------------------------------------------------------------------------------------------------------------------------------------------------------------------------------------------------------------------------------------------------------------------------------------------------------------------------------------------------------------------------------------------------------------------------------------------------------------------------------------------------------------------------------------------------------------------------------------------------|---------|
| 1  | Oral Hygiene/                                                                                                                                                                                                                                                                                                                                                                                                                                                                                                                                                                                                                                                                                                     | 12867   |
| 2  | Mouth Rehabilitation/                                                                                                                                                                                                                                                                                                                                                                                                                                                                                                                                                                                                                                                                                             | 1441    |
| 3  | Oral Health/                                                                                                                                                                                                                                                                                                                                                                                                                                                                                                                                                                                                                                                                                                      | 16483   |
| 4  | exp Dental Health Services/                                                                                                                                                                                                                                                                                                                                                                                                                                                                                                                                                                                                                                                                                       | 38072   |
| 5  | ((dental or oral or tooth or teeth or mouth) adj3 (health or care or hygiene or rehabilitation)).ti,ab,kw.                                                                                                                                                                                                                                                                                                                                                                                                                                                                                                                                                                                                        | 60448   |
| 6  | or/1-5                                                                                                                                                                                                                                                                                                                                                                                                                                                                                                                                                                                                                                                                                                            | 92888   |
| 7  | Smoking/                                                                                                                                                                                                                                                                                                                                                                                                                                                                                                                                                                                                                                                                                                          | 139868  |
| 8  | (smoking or cigarette* or tobacco).ti,ab,kw.                                                                                                                                                                                                                                                                                                                                                                                                                                                                                                                                                                                                                                                                      | 301064  |
| 9  | exp "Tobacco Use"/                                                                                                                                                                                                                                                                                                                                                                                                                                                                                                                                                                                                                                                                                                | 4579    |
| 10 | Alcohol Drinking/                                                                                                                                                                                                                                                                                                                                                                                                                                                                                                                                                                                                                                                                                                 | 66885   |
| 11 | Alcoholism/                                                                                                                                                                                                                                                                                                                                                                                                                                                                                                                                                                                                                                                                                                       | 74948   |
| 12 | Alcoholics/                                                                                                                                                                                                                                                                                                                                                                                                                                                                                                                                                                                                                                                                                                       | 845     |
| 13 | (alcoholic* adj3 (person or people or adult or parent* or family)).ti,ab,kw.                                                                                                                                                                                                                                                                                                                                                                                                                                                                                                                                                                                                                                      | 889     |
| 14 | "street drink*".ti,ab,kw.                                                                                                                                                                                                                                                                                                                                                                                                                                                                                                                                                                                                                                                                                         | 8       |
| 15 | exp Substance-Related Disorders/                                                                                                                                                                                                                                                                                                                                                                                                                                                                                                                                                                                                                                                                                  | 277945  |
| 16 | exp Drug users/                                                                                                                                                                                                                                                                                                                                                                                                                                                                                                                                                                                                                                                                                                   | 3139    |
| 17 | Behavior, Addictive/                                                                                                                                                                                                                                                                                                                                                                                                                                                                                                                                                                                                                                                                                              | 9829    |
| 18 | ((alcohol or drug* or substance*) adj2 (misuse* or abuse* or use* or addict* or dependenc* or issue* or problem)).ti,ab,kw.                                                                                                                                                                                                                                                                                                                                                                                                                                                                                                                                                                                       | 265053  |
| 19 | (drug adj1 (habit or tak* or hard or illicit or inject*)).ti,ab,kw.                                                                                                                                                                                                                                                                                                                                                                                                                                                                                                                                                                                                                                               | 22853   |
| 20 | or/7-19                                                                                                                                                                                                                                                                                                                                                                                                                                                                                                                                                                                                                                                                                                           | 768779  |
| 21 | ((sugar or sucrose or fructose or glucose) adj2 (intake or consum*)).ti,ab,kw.                                                                                                                                                                                                                                                                                                                                                                                                                                                                                                                                                                                                                                    | 13634   |
| 22 | diet*.ti,ab,kw.                                                                                                                                                                                                                                                                                                                                                                                                                                                                                                                                                                                                                                                                                                   | 569753  |
| 23 | "sugary foods".ti,ab,kw.                                                                                                                                                                                                                                                                                                                                                                                                                                                                                                                                                                                                                                                                                          | 175     |
| 24 | exp Dietary Sugars/ or Diet/                                                                                                                                                                                                                                                                                                                                                                                                                                                                                                                                                                                                                                                                                      | 163140  |
| 25 | ((processed or acidic) adj1 food*).ti,ab,kw.                                                                                                                                                                                                                                                                                                                                                                                                                                                                                                                                                                                                                                                                      | 3659    |
| 26 | ((sugary or fizzy or carbonated or soft) adj1 drink*).ti,ab,kw.                                                                                                                                                                                                                                                                                                                                                                                                                                                                                                                                                                                                                                                   | 4464    |
| 27 | carbonated beverages/ or sugar-sweetened beverages/                                                                                                                                                                                                                                                                                                                                                                                                                                                                                                                                                                                                                                                               | 2986    |
| 28 | soda.ti,ab,kw.                                                                                                                                                                                                                                                                                                                                                                                                                                                                                                                                                                                                                                                                                                    | 4168    |
| 29 | or/21-28                                                                                                                                                                                                                                                                                                                                                                                                                                                                                                                                                                                                                                                                                                          | 636784  |
| 30 | or/1-20                                                                                                                                                                                                                                                                                                                                                                                                                                                                                                                                                                                                                                                                                                           | 856955  |
| 31 | (severe and multiple disadvantage*).ti,ab,kw.                                                                                                                                                                                                                                                                                                                                                                                                                                                                                                                                                                                                                                                                     | 4       |
| 32 | Homeless Persons/                                                                                                                                                                                                                                                                                                                                                                                                                                                                                                                                                                                                                                                                                                 | 7717    |
| 33 | homeless*.ti,ab,kw.                                                                                                                                                                                                                                                                                                                                                                                                                                                                                                                                                                                                                                                                                               | 10721   |
| 34 | ((hous* or home* or accommodat* or shelter) adj3 (insecur* or instability or unstable or stability)).ti,ab,kw.                                                                                                                                                                                                                                                                                                                                                                                                                                                                                                                                                                                                    | 2832    |
| 35 | or/32-34                                                                                                                                                                                                                                                                                                                                                                                                                                                                                                                                                                                                                                                                                                          | 14839   |
| 36 | (probationer* or parolee* or ((repeat* or ex or re or revolving door or habitual or multiple or former* or previously*) adj1 (offen* or convict* or prisoner* or imprison* or incarcerat* or criminal*)) or (former adj3 inmate*) or ((community or probation* or parole* or reintegrat*) adj4 (prison* or offender* or criminal* or convict* or inmate*)) or ((individuals or men or women) adj2 (probation or parole)) or ((reintegrate* or reent* or return*) adj3 community)).ti,ab,kw.                                                                                                                                                                                                                       | 3929    |
| 37 | "criminal justice".ti,ab,kw.                                                                                                                                                                                                                                                                                                                                                                                                                                                                                                                                                                                                                                                                                      | 4314    |
| 38 | or/36-37                                                                                                                                                                                                                                                                                                                                                                                                                                                                                                                                                                                                                                                                                                          | 7771    |
| 39 | ((program* or policy or policies or strateg* or scheme* or project* or initiative* or "care package" or training or educat* or pilot or guidance or guideline* or study or pathway or treatment* or promot* or management or "support group" or process* or trial* or intervention*) adj5 (evaluat* or effect* or measur* or assess* or experiment* or impact* or feasab* or acceptab* or efficacy or perception* or belief* or uptake or consequence* or attitud* or barrier* or facilit* or motivat* or experience* or implement* or adher* or retention or retain* or reduc* or increas* or improv* or outcome* or cost* or benefit* or interview* or qualitative or ethnograph* or "focus group*")).ti,ab,kw. | 4377977 |
| 40 | "housing first".ti,ab,kw.                                                                                                                                                                                                                                                                                                                                                                                                                                                                                                                                                                                                                                                                                         | 299     |
| 41 | (outcome* adj5 evaluat*).ti,ab,kw.                                                                                                                                                                                                                                                                                                                                                                                                                                                                                                                                                                                                                                                                                | 82363   |

|    |                                |         |
|----|--------------------------------|---------|
| 42 | or/39-41                       | 4410253 |
| 43 | (35 or 38) and (6 or 20 or 29) | 8276    |
| 44 | 42 and 43                      | 3940    |

For peer review only

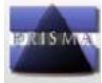

## PRISMA 2020 Checklist

| Section and Topic             | Item # | Checklist item                                                                                                                                                                                                                                                                                       | Location where item is reported |
|-------------------------------|--------|------------------------------------------------------------------------------------------------------------------------------------------------------------------------------------------------------------------------------------------------------------------------------------------------------|---------------------------------|
| <b>TITLE</b>                  |        |                                                                                                                                                                                                                                                                                                      |                                 |
| Title                         | 1      | Identify the report as a systematic review.                                                                                                                                                                                                                                                          | Lines 2-3                       |
| <b>ABSTRACT</b>               |        |                                                                                                                                                                                                                                                                                                      |                                 |
| Abstract                      | 2      | See the PRISMA 2020 for Abstracts checklist.                                                                                                                                                                                                                                                         | Page 1                          |
| <b>INTRODUCTION</b>           |        |                                                                                                                                                                                                                                                                                                      |                                 |
| Rationale                     | 3      | Describe the rationale for the review in the context of existing knowledge.                                                                                                                                                                                                                          | Lines 38 - 44                   |
| Objectives                    | 4      | Provide an explicit statement of the objective(s) or question(s) the review addresses.                                                                                                                                                                                                               | Lines 54- 56                    |
| <b>METHODS</b>                |        |                                                                                                                                                                                                                                                                                                      |                                 |
| Eligibility criteria          | 5      | Specify the inclusion and exclusion criteria for the review and how studies were grouped for the syntheses.                                                                                                                                                                                          | Table 1                         |
| Information sources           | 6      | Specify all databases, registers, websites, organisations, reference lists and other sources searched or consulted to identify studies. Specify the date when each source was last searched or consulted.                                                                                            | Lines 63- 68                    |
| Search strategy               | 7      | Present the full search strategies for all databases, registers and websites, including any filters and limits used.                                                                                                                                                                                 | Supplementary file              |
| Selection process             | 8      | Specify the methods used to decide whether a study met the inclusion criteria of the review, including how many reviewers screened each record and each report retrieved, whether they worked independently, and if applicable, details of automation tools used in the process.                     | Lines 70 -73                    |
| Data collection process       | 9      | Specify the methods used to collect data from reports, including how many reviewers collected data from each report, whether they worked independently, any processes for obtaining or confirming data from study investigators, and if applicable, details of automation tools used in the process. | Lines 85 - 91                   |
| Data items                    | 10a    | List and define all outcomes for which data were sought. Specify whether all results that were compatible with each outcome domain in each study were sought (e.g. for all measures, time points, analyses), and if not, the methods used to decide which results to collect.                        | Table 1                         |
|                               | 10b    | List and define all other variables for which data were sought (e.g. participant and intervention characteristics, funding sources). Describe any assumptions made about any missing or unclear information.                                                                                         | Table 1 and Table 2             |
| Study risk of bias assessment | 11     | Specify the methods used to assess risk of bias in the included studies, including details of the tool(s) used, how many reviewers assessed each study and whether they worked independently, and if applicable, details of automation tools used in the process.                                    | Lines 75 - 83                   |
| Effect measures               | 12     | Specify for each outcome the effect measure(s) (e.g. risk ratio, mean difference) used in the synthesis or presentation of results.                                                                                                                                                                  | Table 2                         |
| Synthesis methods             | 13a    | Describe the processes used to decide which studies were eligible for each synthesis (e.g. tabulating the study intervention characteristics and comparing against the planned groups for each synthesis (item #5)).                                                                                 | Table 1                         |
|                               | 13b    | Describe any methods required to prepare the data for presentation or synthesis, such as handling of missing summary statistics, or data conversions.                                                                                                                                                | Lines 85 -91                    |
|                               | 13c    | Describe any methods used to tabulate or visually display results of individual studies and syntheses.                                                                                                                                                                                               | Lines 85 -91                    |
|                               | 13d    | Describe any methods used to synthesize results and provide a rationale for the choice(s). If meta-analysis was performed, describe the model(s), method(s) to identify the presence and extent of statistical heterogeneity, and software package(s) used.                                          | Lines 85 -91                    |
|                               | 13e    | Describe any methods used to explore possible causes of heterogeneity among study results (e.g. subgroup analysis, meta-regression).                                                                                                                                                                 | N/A                             |
|                               | 13f    | Describe any sensitivity analyses conducted to assess robustness of the synthesized results.                                                                                                                                                                                                         | N/A                             |
| Reporting bias assessment     | 14     | Describe any methods used to assess risk of bias due to missing results in a synthesis (arising from reporting biases).                                                                                                                                                                              | Lines 75 - 83                   |
| Certainty                     | 15     | Describe any methods used to assess certainty (or confidence) in the body of evidence for an outcome.                                                                                                                                                                                                | Lines 75 - 83                   |

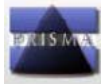

## PRISMA 2020 Checklist

| Section and Topic              | Item # | Checklist item                                                                                                                                                                                                                                                                       | Location where item is reported |
|--------------------------------|--------|--------------------------------------------------------------------------------------------------------------------------------------------------------------------------------------------------------------------------------------------------------------------------------------|---------------------------------|
| assessment                     |        |                                                                                                                                                                                                                                                                                      |                                 |
| <b>RESULTS</b>                 |        |                                                                                                                                                                                                                                                                                      |                                 |
| Study selection                | 16a    | Describe the results of the search and selection process, from the number of records identified in the search to the number of studies included in the review, ideally using a flow diagram.                                                                                         | Figure 1                        |
|                                | 16b    | Cite studies that might appear to meet the inclusion criteria, but which were excluded, and explain why they were excluded.                                                                                                                                                          | Figure 1                        |
| Study characteristics          | 17     | Cite each included study and present its characteristics.                                                                                                                                                                                                                            | Table 2                         |
| Risk of bias in studies        | 18     | Present assessments of risk of bias for each included study.                                                                                                                                                                                                                         | Table 2                         |
| Results of individual studies  | 19     | For all outcomes, present, for each study: (a) summary statistics for each group (where appropriate) and (b) an effect estimate and its precision (e.g. confidence/credible interval), ideally using structured tables or plots.                                                     | Table 1                         |
| Results of syntheses           | 20a    | For each synthesis, briefly summarise the characteristics and risk of bias among contributing studies.                                                                                                                                                                               | Lines 102 -108                  |
|                                | 20b    | Present results of all statistical syntheses conducted. If meta-analysis was done, present for each the summary estimate and its precision (e.g. confidence/credible interval) and measures of statistical heterogeneity. If comparing groups, describe the direction of the effect. | N/A                             |
|                                | 20c    | Present results of all investigations of possible causes of heterogeneity among study results.                                                                                                                                                                                       | N/A                             |
|                                | 20d    | Present results of all sensitivity analyses conducted to assess the robustness of the synthesized results.                                                                                                                                                                           | N/A                             |
| Reporting biases               | 21     | Present assessments of risk of bias due to missing results (arising from reporting biases) for each synthesis assessed.                                                                                                                                                              | Lines 103 - 108                 |
| Certainty of evidence          | 22     | Present assessments of certainty (or confidence) in the body of evidence for each outcome assessed.                                                                                                                                                                                  | N/A                             |
| <b>DISCUSSION</b>              |        |                                                                                                                                                                                                                                                                                      |                                 |
| Discussion                     | 23a    | Provide a general interpretation of the results in the context of other evidence.                                                                                                                                                                                                    | Lines 223 -251                  |
|                                | 23b    | Discuss any limitations of the evidence included in the review.                                                                                                                                                                                                                      | Lines 274 - 277                 |
|                                | 23c    | Discuss any limitations of the review processes used.                                                                                                                                                                                                                                | Lines 277 -278                  |
|                                | 23d    | Discuss implications of the results for practice, policy, and future research.                                                                                                                                                                                                       | Lines 281 -288                  |
| <b>OTHER INFORMATION</b>       |        |                                                                                                                                                                                                                                                                                      |                                 |
| Registration and protocol      | 24a    | Provide registration information for the review, including register name and registration number, or state that the review was not registered.                                                                                                                                       | Lines 58 -59                    |
|                                | 24b    | Indicate where the review protocol can be accessed, or state that a protocol was not prepared.                                                                                                                                                                                       | Lines 58 -59                    |
|                                | 24c    | Describe and explain any amendments to information provided at registration or in the protocol.                                                                                                                                                                                      |                                 |
| Support                        | 25     | Describe sources of financial or non-financial support for the review, and the role of the funders or sponsors in the review.                                                                                                                                                        | Lines 295 - 300                 |
| Competing interests            | 26     | Declare any competing interests of review authors.                                                                                                                                                                                                                                   | Lines 302-304                   |
| Availability of data, code and | 27     | Report which of the following are publicly available and where they can be found: template data collection forms; data extracted from included studies; data used for all analyses; analytic code; any other materials used in the review                                            | N/A                             |

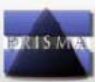

# PRISMA 2020 Checklist

1  
2  
3  
4  
5  
6  
7  
8  
9  
10  
11  
12  
13  
14  
15  
16  
17  
18  
19  
20  
21  
22  
23  
24  
25  
26  
27  
28  
29  
30  
31  
32  
33  
34  
35  
36  
37  
38  
39  
40  
41  
42  
43  
44  
45  
46  
47

| Section and Topic | Item # | Checklist item | Location where item is reported |
|-------------------|--------|----------------|---------------------------------|
| other materials   |        |                |                                 |

From: Page MJ, McKenzie JE, Bossuyt PM, Boutron I, Hoffmann TC, Mulrow CD, et al. The PRISMA 2020 statement: an updated guideline for reporting systematic reviews. *BMJ* 2021;372:n71. doi: 10.1136/bmj.n71

For more information, visit: <http://www.prisma-statement.org/>

For peer review only

# BMJ Open

## Factors influencing implementation and sustainability of interventions to improve oral health and related health behaviours in adults experiencing severe and multiple disadvantage: A mixed-methods systematic review

|                                 |                                                                                                                                                                                                                                                                                                                                                                                                                                                                                                                                                                                                                                                                                                                                                                                                                                                                                                                                                                                                                                                                                                                                                                                                                                                                                                                                                                                                                              |
|---------------------------------|------------------------------------------------------------------------------------------------------------------------------------------------------------------------------------------------------------------------------------------------------------------------------------------------------------------------------------------------------------------------------------------------------------------------------------------------------------------------------------------------------------------------------------------------------------------------------------------------------------------------------------------------------------------------------------------------------------------------------------------------------------------------------------------------------------------------------------------------------------------------------------------------------------------------------------------------------------------------------------------------------------------------------------------------------------------------------------------------------------------------------------------------------------------------------------------------------------------------------------------------------------------------------------------------------------------------------------------------------------------------------------------------------------------------------|
| Journal:                        | <i>BMJ Open</i>                                                                                                                                                                                                                                                                                                                                                                                                                                                                                                                                                                                                                                                                                                                                                                                                                                                                                                                                                                                                                                                                                                                                                                                                                                                                                                                                                                                                              |
| Manuscript ID                   | bmjopen-2023-080160.R2                                                                                                                                                                                                                                                                                                                                                                                                                                                                                                                                                                                                                                                                                                                                                                                                                                                                                                                                                                                                                                                                                                                                                                                                                                                                                                                                                                                                       |
| Article Type:                   | Original research                                                                                                                                                                                                                                                                                                                                                                                                                                                                                                                                                                                                                                                                                                                                                                                                                                                                                                                                                                                                                                                                                                                                                                                                                                                                                                                                                                                                            |
| Date Submitted by the Author:   | 11-Dec-2023                                                                                                                                                                                                                                                                                                                                                                                                                                                                                                                                                                                                                                                                                                                                                                                                                                                                                                                                                                                                                                                                                                                                                                                                                                                                                                                                                                                                                  |
| Complete List of Authors:       | John , Deepti; Newcastle University Population Health Sciences Institute<br>Adams, Emma; Newcastle University Population Health Sciences Institute<br>McGowan, Laura; Newcastle University Population Health Sciences Institute<br>Joyes, Emma; Newcastle University Population Health Sciences Institute<br>Richmond, Catherine; Newcastle University Population Health Sciences Institute<br>Beyer, Fiona ; Newcastle University Population Health Sciences Institute, Evidence Synthesis Group and Innovation Observatory<br>Landes, David; NHS England and NHS Improvement North East and Yorkshire<br>Watt, Richard; University College London, Epidemiology and Public Health; King's College London, King's College Dental Institute<br>Sniehotta, Falko; Newcastle University Population Health Sciences Institute, NIHR Policy Research Unit Behavioural Science; Heidelberg University Medical Faculty Mannheim, Department of Public Health, Social and Preventive Medicine, Centre for Preventive Medicine and Digital Health (CPD)<br>Paisi, Martha; Plymouth University Peninsula Dental School<br>Bambra, Clare; Newcastle University Population Health Sciences Institute<br>Craig, Dawn; Newcastle University Population Health Sciences Institute<br>Kaner, Eileen; Newcastle University Population Health Sciences Institute<br>Ramsay, Sheena; Newcastle University Population Health Sciences Institute |
| <b>Primary Subject Heading</b>: | Public health                                                                                                                                                                                                                                                                                                                                                                                                                                                                                                                                                                                                                                                                                                                                                                                                                                                                                                                                                                                                                                                                                                                                                                                                                                                                                                                                                                                                                |
| Secondary Subject Heading:      | Health policy, Smoking and tobacco, Dentistry and oral medicine                                                                                                                                                                                                                                                                                                                                                                                                                                                                                                                                                                                                                                                                                                                                                                                                                                                                                                                                                                                                                                                                                                                                                                                                                                                                                                                                                              |
| Keywords:                       | Health Equity, PUBLIC HEALTH, Behavior                                                                                                                                                                                                                                                                                                                                                                                                                                                                                                                                                                                                                                                                                                                                                                                                                                                                                                                                                                                                                                                                                                                                                                                                                                                                                                                                                                                       |
|                                 |                                                                                                                                                                                                                                                                                                                                                                                                                                                                                                                                                                                                                                                                                                                                                                                                                                                                                                                                                                                                                                                                                                                                                                                                                                                                                                                                                                                                                              |

SCHOLARONE™  
Manuscripts



1  
2  
3  
4  
5  
6  
7  
8  
9  
10  
11  
12  
13  
14  
15  
16  
17  
18  
19  
20  
21  
22  
23  
24  
25  
26  
27  
28  
29  
30  
31  
32  
33  
34  
35  
36  
37  
38  
39  
40  
41  
42  
43  
44  
45  
46  
47  
48  
49  
50  
51  
52  
53  
54  
55  
56  
57  
58  
59  
60



I, the Submitting Author has the right to grant and does grant on behalf of all authors of the Work (as defined in the below author licence), an exclusive licence and/or a non-exclusive licence for contributions from authors who are: i) UK Crown employees; ii) where BMJ has agreed a CC-BY licence shall apply, and/or iii) in accordance with the terms applicable for US Federal Government officers or employees acting as part of their official duties; on a worldwide, perpetual, irrevocable, royalty-free basis to BMJ Publishing Group Ltd ("BMJ") its licensees and where the relevant Journal is co-owned by BMJ to the co-owners of the Journal, to publish the Work in this journal and any other BMJ products and to exploit all rights, as set out in our [licence](#).

The Submitting Author accepts and understands that any supply made under these terms is made by BMJ to the Submitting Author unless you are acting as an employee on behalf of your employer or a postgraduate student of an affiliated institution which is paying any applicable article publishing charge ("APC") for Open Access articles. Where the Submitting Author wishes to make the Work available on an Open Access basis (and intends to pay the relevant APC), the terms of reuse of such Open Access shall be governed by a Creative Commons licence – details of these licences and which [Creative Commons](#) licence will apply to this Work are set out in our licence referred to above.

Other than as permitted in any relevant BMJ Author's Self Archiving Policies, I confirm this Work has not been accepted for publication elsewhere, is not being considered for publication elsewhere and does not duplicate material already published. I confirm all authors consent to publication of this Work and authorise the granting of this licence.

1  
2  
3 **Factors influencing implementation and sustainability of interventions to improve oral health and**  
4 **related health behaviours in adults experiencing severe and multiple disadvantage: A mixed-**  
5 **methods systematic review**  
6  
7

8  
9 **Authors**

10 Mrs. Deepti A. John, MDPH - Population Health Sciences Institute, Newcastle University, Newcastle  
11 Upon Tyne NE2 4AX, UK

12 Ms. Emma A. Adams, MSc. - Population Health Sciences Institute, Newcastle University, Newcastle  
13 Upon Tyne NE2 4AX, UK

14 Dr. Laura J. McGowan, PhD - Population Health Sciences Institute, Newcastle University, Newcastle  
15 Upon Tyne NE2 4AX, UK

16 Dr. Emma C. Joyes, PhD - Population Health Sciences Institute, Newcastle University, Newcastle  
17 Upon Tyne NE2 4AX, UK

18 Ms. Catherine Richmond, MA - Population Health Sciences Institute, Newcastle University,  
19 Newcastle Upon Tyne NE2 4AX, UK

20 Dr. Fiona R. Beyer, PhD - Evidence Synthesis Group and Innovation Observatory, Population Health  
21 Sciences Institute, Newcastle University, Newcastle Upon Tyne NE2 4AX, UK

22 Mr. David Landes, BDS - NHS England & Improvement, Newcastle Upon Tyne NE15 8NY, UK

23 Prof. Richard Watt, PhD - Department of Epidemiology and Public Health, University College London,  
24 London WC1E 7HB, UK

25 Prof. Falko F. Sniehotta, PhD - NIHR Policy Research Unit Behavioural Science, Newcastle University,  
26 NE2 4AX And Department of Public Health, Social and Preventive Medicine, Centre for Preventive  
27 Medicine and Digital Health (CPD), Medical Faculty Mannheim, Heidelberg University, 68167  
28 Mannheim

29 Dr. Martha Paisi, PhD - Faculty of Medicine and Dentistry, Peninsula Dental School, University of  
30 Plymouth, Plymouth PL4 8AA, UK

31 Prof. Clare Bambra, PhD - Population Health Sciences Institute, Newcastle University, Newcastle  
32 Upon Tyne NE2 4AX, UK

33 Prof. Dawn Craig, MSc. - Population Health Sciences Institute, Newcastle University, Newcastle Upon  
34 Tyne NE2 4AX, UK

35 Prof. Eileen Kaner, PhD - Population Health Sciences Institute, Newcastle University, Newcastle Upon  
36 Tyne NE2 4AX, UK

37 Prof. Sheena E. Ramsay, PhD - Population Health Sciences Institute, Newcastle University, Newcastle  
38 Upon Tyne NE2 4AX, UK

39  
40  
41  
42  
43 **Corresponding Author:**

44 Deepti John

45 [Deepti.john@newcastle.ac.uk](mailto:Deepti.john@newcastle.ac.uk)

46 Phone no: +44 7469646623

47 Population Health Sciences Institute, Newcastle University

48 The Baddiley-Clark Building, Richardson Road

49 Newcastle upon Tyne, NE2 4AX

50 United Kingdom  
51  
52  
53  
54  
55  
56  
57  
58  
59  
60

## Abstract

### Objectives

Among people experiencing severe and multiple disadvantage (SMD) poor oral health is common and linked to smoking, substance use and high sugar intake. Studies have explored interventions addressing oral health and related behaviours; however, factors related to the implementation of these interventions remains unclear. This mixed-methods systematic review aimed to synthesize evidence on the implementation and sustainability of interventions to improve oral health and related health behaviours among adults experiencing SMD.

### Methods

Bibliographic databases (MEDLINE, EMBASE, PsycINFO, CINAHL, EBSCO, Scopus) and grey literature were searched from inception to February 2023. Studies meeting the inclusion criteria were screened and extracted independently by two researchers. Quality appraisal was undertaken, and results were synthesised using narrative and thematic analyses.

### Results

Seventeen papers were included (published between 1995-2022). Studies were mostly of moderate quality and included views from SMD groups and service providers. From the qualitative synthesis, most findings were related to aspects such as trust, resources, and motivation levels of SMD groups and service providers. None of the studies reported on diet and none included repeated offending (one of the aspects of SMD). From the quantitative synthesis, no difference was observed in program attendance between the interventions and usual care, although there was some indication of sustained improvements in participation in the intervention group.

### Conclusion

This review provides some evidence that trust, adequate resources, and motivation levels are potentially important in implementing interventions to improve oral health and substance use among SMD groups. Further research is needed from high quality studies and focusing on diet in this population.

### Strengths and limitations of this study

- Comprehensive search strategy was used to gather evidence in this mixed methods systematic review.

- Consolidated Framework for Implementation Research (CFIR) was used for the data extraction.
- Confidence in the papers were limited due to moderate quality of the papers.
- The included studies were not excluded based on their quality, as they contributed relevant information for this systematic review.

**Keywords:** multiple disadvantage, homeless, oral health, implementation

## INTRODUCTION

Severe and multiple disadvantaged (SMD) populations are individuals who have experienced homelessness, substance use, offending or a combination of all three.(1) They experience disproportionately high levels of poor physical and mental health along with high levels of occupational deprivation,(1) which results in isolation and difficulty in accessing healthcare services.(2) There is also an added burden of stigma that affects their access and engagement.(3)

Among people experiencing SMD, oral health problems have been highlighted as one of the major unmet needs.(4) Aggravated by high levels of smoking, substance and alcohol use and poor diet (high intake of sugar).(4, 5) Elevated tobacco use make them more susceptible to periodontal disease, tooth loss, oral lesions and oral cancer.(5, 6) Research also shows that they do not meet the daily nutritional requirements and have high levels of sugar consumption.(6, 7) Oral health has an overall impact on physical and mental wellbeing.(8) It is, therefore, important to not only address oral health concerns in people experiencing SMD, but also related health behaviours such as smoking, alcohol and substance use, and poor nutrition.(1, 9)

Previous papers focus on intervention design and outcomes, none focus on the implementation approach of these intervention especially in people experiencing SMD.(10, 11, 12) Hence, there is a need for evidence on interventions addressing these health challenges, with a specific focus on ways to improve implementation and long-term sustainability of interventions. Frameworks are used to apply a theoretical underpinning to our understanding of why implementation of interventions succeed or fail. The Consolidated Framework for implementation Research (CFIR) composed of five domains was utilised as a theoretical framework to identify the facilitators and barriers that influence implementation. (13, 14) This framework, therefore, assists with bridging the gap between research and practice as well as reducing the challenges of implementing these interventions.(15)

To investigate how we can improve implementation and sustainability, we conducted this systematic review to synthesize various factors such as acceptability, settings, and potential adverse effects of interventions that improve oral health and related health behaviours of adults with SMD.

## METHODS

The research protocol was pre-registered and published registered with the Prospective Register of Systematic Reviews (PROSPERO) (reg. no: CRD42020202416).(16, 17) The review was reported according to Preferred Reporting Items for Systematic Reviews and Meta-Analyses (PRISMA) guidelines.(18)

### Search strategy

The search strategy (see Supplementary file.) was formulated and conducted with an information specialist within the research team. The following electronic databases: MEDLINE (Ovid), EMBASE (Ovid), CINAHL (Ebsco), APA PsycINFO (Ovid) and Scopus were searched for relevant qualitative, quantitative, and mixed method studies from inception to February 2023. Grey literature searches were conducted using Google Incognito and selected charity organization websites such as Fulfilling Lives, Crisis, Groundswell, which were informed by the expertise of the research team. Forward and backward citation search of the included studies were also conducted.

### Study selection

The search results were downloaded and deduplicated using EndNote 20.4.1 and the uploaded into Covidence, an online tool for managing the whole systematic review process.(19) Title, abstracts and full texts were independently screened by two reviewers. In the case of a discrepancy, consensus was reached after consultation with a third reviewer. Table 1 presents the inclusion criteria used during screening.

Table 1: *Eligibility Criteria used to select the studies*

|                     | <i>Eligibility Criteria</i>                                                                                                                                                                                                                                                                                                                                |
|---------------------|------------------------------------------------------------------------------------------------------------------------------------------------------------------------------------------------------------------------------------------------------------------------------------------------------------------------------------------------------------|
| <i>Population</i>   | Adults aged 18 or above, who experience SMD comprising of either homelessness (rough sleeping or other types of insecure accommodation), repeated offending or frequent substance use that co-occurs with homelessness or repeated offending.(17) Perspectives of staff who work with SMD groups and stakeholders such as policy makers and commissioners. |
| <i>Intervention</i> | Structural, community and individual level interventions.(17)                                                                                                                                                                                                                                                                                              |
| <i>Outcomes</i>     | Views from SMD groups and other stakeholders (policy makers, service providers, voluntary sector etc) about implementation and sustainability of interventions which include acceptability, content, settings, potential harms, uptake, and retention.(17)                                                                                                 |
| <i>Study Design</i> | Qualitative, quantitative, and mixed method studies                                                                                                                                                                                                                                                                                                        |

### Data extraction and quality appraisal

The data extraction and quality assessment for all the included studies were conducted by one reviewer and cross-checked by a second reviewer. Included studies were critically appraised to guide

1  
2  
3 how much confidences could be placed on the findings. Qualitative studies were appraised using the  
4 Critical Appraisal Skills Programme (CASP) qualitative checklist.(20) Quantitative studies were  
5 appraised using Cochrane’s Risk of bias for randomized control trials (RCTs).(21) For cross-sectional  
6 studies the National Institutes of Health (NIH) Study Quality Appraisal Tool was used.(22) Qualitative  
7 studies were rated as good, moderate or low quality, which was informed by a scoring system:  
8 scores 9–10 was high quality, 7.5–9 was moderate quality and <7.5 was low quality.(23) The scoring  
9 were informed by the quality checklists. Studies were not excluded based on their quality; poor  
10 reporting is not always reflective of poor methodology. (24) Studies were included on whether they  
11 contributed data relevant or novel data to this review.(24) Moreover, including all studies allowed  
12 gathering the global evidence related to the review questions.

### 20 **Data synthesis**

21  
22 Abstracts and data from the results of included studies were uploaded on to NVivo software (QSR  
23 International Pty Ltd., Melbourne, Australia Version 12, Release 1.6.1). Narrative synthesis was  
24 undertaken. Deductive codes based on the CFIR framework were used to initially code the findings  
25 followed by a three-step inductive synthesis process which involved coding the text, identifying the  
26 themes, and creating the subthemes. To maximise thematic yield, data reported in different papers  
27 but from the same study were individually coded. The developing themes and subthemes were  
28 discussed with the other reviewers and consensus was reached regarding these.

### 34 **Patient and public involvement**

35  
36 Patients and/or the public were not involved in the design, or conduct, or reporting, or  
37 dissemination plans of this research.

## 40 **RESULTS**

41  
42 Seventeen articles (twelve individual studies) met the inclusion criteria and were included in this  
43 systematic review. Figure 1 presents the PRISMA flowchart for included studies. Table 2 presents the  
44 descriptive summaries of the included studies. The papers were published between 1995 and 2022,  
45 and were related to interventions targeting oral health,(25, 26, 27, 28, 29, 30, 31, 32) substance  
46 use,(33, 34, 35, 36, 37, 38, 39) smoking and none on diet.

Table 2: Descriptive summaries of the seventeen included studies, including quality appraisal (High quality/moderate quality/low quality)

| No. | First Author (Year) and Country                     | Sample Size and Age of the participants                                        | Participant Group                                                                                        | Intervention Description                                                                                                                                                                            | Type of Research, Data Collection and Analysis                                               | Findings of the paper relevant to the review                                                                                                                                       | Quality Appraisal/ Risk of Bias  |
|-----|-----------------------------------------------------|--------------------------------------------------------------------------------|----------------------------------------------------------------------------------------------------------|-----------------------------------------------------------------------------------------------------------------------------------------------------------------------------------------------------|----------------------------------------------------------------------------------------------|------------------------------------------------------------------------------------------------------------------------------------------------------------------------------------|----------------------------------|
| 1.  | Beaton et al (2016) United Kingdom(25)              | N=20, age not mentioned                                                        | Health and social care workers                                                                           | Motivational interviewing to promote oral health among homeless populations ("Smile4Life programme")                                                                                                | Qualitative - Telephone interviews, framework approach                                       | Familiarity and good relationships between service providers and third sector organizations facilitated implementation whereas lack of resources and interest hindered it          | High quality                     |
| 2.  | Beaton et al (2018) United Kingdom (26)             | N= 9 observation sessions, age not mentioned                                   | Oral healthcare workers such as oral health educators and dental support workers                         | Motivational interviewing and tailored advice to promote oral health among the homeless population at different settings such as mobile dental units and homeless shelters ("Smile4Life programme") | Qualitative- Participant observation, content analysis                                       | Good working relationships between healthcare providers, patients and third sector organizations are important                                                                     | Moderate quality                 |
| 3.  | Beaton et al (2021) United Kingdom (27)             | N= 100, 16- 85 years                                                           | Oral health practitioners, third sector organization staff and local authority staff                     | Motivational interviewing and behavioural change techniques to promote oral health among the homeless ("Smile4Life programme")                                                                      | Quantitative- Questionnaire, K-R20, Exploratory factor analysis, multivariate path analysis. | Work practices such as positive attitudes and beliefs of the oral healthcare workers influence implementation                                                                      | Moderate/ Fair quality           |
| 4.  | Burnam et al (1995) United States of America(34)    | N= 276, mean age = 37 years                                                    | Homeless individuals with co-occurring substance and mental health issues                                | Social model of residential and non-residential programs providing integrated substance use and mental health services                                                                              | Quantitative- Structured interviews, regression analyses                                     | Retention levels were higher in the residential program compared to the non-residential one                                                                                        | Low quality (high Risk of Bias ) |
| 5.  | Coles et al (2013) United Kingdom(29)               | N= 14, age not mentioned                                                       | Healthcare workers from statutory and non-statutory organizations                                        | A framework that offers tailored oral health advice and signposts to relevant dental services. ("Something To Smile About")                                                                         | Qualitative- Focus groups, content analysis                                                  | Oral health knowledge among the healthcare workers improved but complex needs such as housing, employment etc must be addressed prior to oral health for successful implementation | Moderate quality                 |
| 6.  | Collins et al (2019) United States of America(35)   | N= 168, mean age= 47 years                                                     | Homeless individuals with alcohol use disorder                                                           | Non-abstinence treatment program that involves tracking of alcohol use, discussion of safe drinking practices and goal-oriented tasks. ("Harm Reduction Treatment for Alcohol HaRT-A")              | Quantitative-Questionnaires, content analysis                                                | It was positively viewed by the participants with high levels of retention and satisfaction                                                                                        | Good quality (low ROB)           |
| 7.  | Doughty et al (2020) United Kingdom(31)             | Service users – N= 353, age not mentioned<br>Service providers – not stated    | Homeless individuals and oral healthcare workers such as dentists, dental nurses, dental technicians etc | Denture service provided by Crisis at Christmas Dental Service and Den-tech to the homeless and vulnerably housed                                                                                   | Qualitative                                                                                  | Communication, timing, resources, and training were considered as areas that needed to be improved                                                                                 | Low quality                      |
| 8.  | Forchuk et al (2022) Canada(36)                     | Service users – N= 58, mean age = 52.5 years<br>Service providers – not stated | Homeless veterans with substance use problems and staff from housing services                            | Housing provided along with the peer support and harm reduction services to homeless veterans ("Housing First")                                                                                     | Qualitative - Interviews and focus groups, Thematic analysis                                 | Stable housing with harm reduction services was well received. Collaboration between mental health and addiction services should be considered for future services                 | Low quality                      |
| 9.  | Henderson et al (2004) United States of America(37) | Service users – N = 15<br>Service providers – not mentioned                    | Homeless veterans with substance/alcohol use and program staff such as                                   | Residential substance use treatment program that focuses on relapse prevention along with education and housing stability for homeless men                                                          | Qualitative - Surveys, direct observation and Interviews, not stated                         | Majority of the participants provided positive feedback. Staffing issues such as training and                                                                                      | Moderate quality                 |



1  
2  
3  
4  
5  
6  
7  
8  
9  
10  
11  
12  
13  
14  
15  
16  
17  
18  
19  
20  
21  
22  
23  
24  
25  
26  
27  
28  
29  
30  
31  
32  
33  
34  
35  
36  
37  
38  
39  
40  
41  
42  
43  
44  
45  
46

| No. | First Author (Year) and Country                  | Sample Size and Age of the participants                                             | Participant Group                                                                                                          | Intervention Description                                                                                                                                                                 | Type of Research, Data Collection and Analysis                                               | Findings of the paper relevant to the review                                                                                                                      | Quality Appraisal/ Risk of Bias |
|-----|--------------------------------------------------|-------------------------------------------------------------------------------------|----------------------------------------------------------------------------------------------------------------------------|------------------------------------------------------------------------------------------------------------------------------------------------------------------------------------------|----------------------------------------------------------------------------------------------|-------------------------------------------------------------------------------------------------------------------------------------------------------------------|---------------------------------|
|     |                                                  |                                                                                     | healthcare workers and administrative staff                                                                                |                                                                                                                                                                                          |                                                                                              | competing workload were noted as drawbacks to the program                                                                                                         |                                 |
| 10. | Neale et al (2014) United Kingdom(33)            | Service users - N= 30, 23- 62 years<br>Service providers – N= 15, age not mentioned | Homeless individuals with substance use and mentors such as substance use workers, substance use managers and hostel staff | Computer assisted therapies using 20 different psychosocial intervention strategies to identify and reduce substance use based in hostels and homeless shelters (“Breaking Free Online”) | Qualitative- Interviews, Inductive coding and Framework approach                             | ‘Program features’, ‘mentor support’, ‘participant characteristics’ and ‘delivery context’ were noted as factors that lead to successful delivery.                | Moderate quality                |
| 11. | Paisi et al (2020) United Kingdom (32)           | Service users – N= 11, 20 -65 years<br>Service providers – N= 11, age not mentioned | Homeless individuals and the dental clinic staff members, support workers and volunteers.                                  | Community dental clinic that provides both regular and emergency treatments.                                                                                                             | Qualitative – semi structured interviews, reflective thematic analysis                       | Flexibility and the relationship between the patient and dental provider were highlighted as important features.                                                  | High quality                    |
| 12. | Pauly et al (2020) Canada(38)                    | N= 14, 29-61 years                                                                  | Homeless with illicit alcohol use                                                                                          | Non-residential community managed alcohol program which provides harm reduction strategies and peer support (“Canadian Managed Alcohol Program Study”)                                   | Qualitative- Semi- structured interviews, inductive coding and constant comparative analysis | Peer led program was successful as it facilitates capacity building, engagement, and empowerment                                                                  | Moderate quality                |
| 13. | Pratt et al (2019) United States of America(40)  | N= 40, 29-69 years                                                                  | Homeless with smoking and alcohol use                                                                                      | Nicotine replacement therapy and motivational interviewing/cognitive behavioural therapy to reduce smoking and alcohol use among the homeless (“Power To Quit 2”)                        | Qualitative- Interviews, social constructivist approach to grounded theory                   | Social (peer groups) and environmental (housing etc) factors impact cessation in homeless smokers                                                                 | High quality                    |
| 14. | Pratt et al (2022) United States of America (41) | N= 40, 29-70 years                                                                  | Homeless with smoking and alcohol use                                                                                      | Nicotine replacement therapy and motivational interviewing/cognitive behavioural therapy to reduce smoking and alcohol use among the homeless (“Power To Quit 2”)                        | Qualitative – Semi structured interviews, social constructivist approach to grounded theory  | Social pressure and shelter environment impact the intervention but the integrated treatment along with emotional support from the staff make it beneficial.      | High quality                    |
| 15. | Rash et al (2017) United States of America(39)   | N= 355, mean age = 37 years                                                         | Homeless with substance use                                                                                                | Behavioural intervention contingency management with the use of incentives such as vouchers and prizes delivered at local community clinics                                              | Quantitative-Adaptation of the Service Utilization Form, Multivariate analysis of variance.  | Retention was higher in groups that accessed the intervention compared to the standard arm of care                                                                | Moderate/fair quality           |
| 16. | Rodriguez et al (2019) United Kingdom(28)        | Service users - N= 13, 18- 22 years<br>Service providers – N= 5, age not mentioned  | Young homeless people and NGO practitioners                                                                                | Pedagogical workshops about oral health, mental health, substance misuse, diet etc to increase engagement and awareness                                                                  | Qualitative- Unstructured interviews and workshops, content analysis                         | Involvement of young people in co-designing an intervention facilitates engagement, trust building and increases health literacy                                  | High quality                    |
| 17. | Stormon et al (2018) Australia(30)               | N= 76, 41-60 years<br>Feedback – N=24                                               | Disadvantaged adults (clients of community organizations that utilize housing, employment and food services)               | Facilitated access pathway between homeless organizations and public dental services. Improving oral health by assessing dental needs, offering dental advice and dental appointments    | Quantitative-Questionnaire, Descriptive analysis, and Framework approach                     | Positive feedback by participants facilitated by the environment, clinical staff and flexibility. Attendance rates varied across the site but was generally high. | Fair/ moderate quality          |

1  
2  
3 SMD groups in the studies found in this review included young adults, single mothers, veterans, and  
4 adults with co-occurring conditions of severe mental illness. Based on the information reported in  
5 the studies, most of the interventions were focused on adults who were experiencing homelessness  
6 and substance use issues,(33, 34, 35, 36, 37, 38, 39, 40) but did not explicitly report on whether they  
7 included those who had repeated involvement with the criminal justice system.  
8  
9  
10

### 11 **Quality appraisal**

12  
13  
14 Of the twelve articles reporting qualitative findings, two were low quality due to lack of detailed  
15 findings and methodology not being reported adequately,(31, 36) five moderate quality,(26, 29, 33,  
16 37, 38) due to reporting bias and five high quality.(25, 28, 32, 40, 41) The risk of bias was assessed  
17 for the five articles reporting quantitative findings; among the two RCTs: one had a high risk of bias  
18 because of attrition and reporting bias,(34) and the other article had a low risk of bias,(35) the  
19 remaining three cross-sectional studies were of moderate quality.(27, 30, 39) The findings reported  
20 in this review are mostly from high or moderate quality articles, with the inclusion of insights from  
21 low quality articles employed strategically for completeness of reporting evidence available and to  
22 supplement findings from the adequately reported articles.  
23  
24  
25  
26  
27  
28  
29

### 30 **Synthesis of qualitative findings**

31  
32 Table 3 presents the themes, subthemes, codes, and quotes from individuals experiencing SMD and  
33 frontline staff and stakeholders.  
34  
35  
36  
37  
38  
39  
40  
41  
42  
43  
44  
45  
46  
47  
48  
49  
50  
51  
52  
53  
54  
55  
56  
57  
58  
59  
60

Table 3: Themes and subthemes from qualitative synthesis of findings along with the relevant codes and quotes

| Themes                | Subthemes                         | Codes                                                                                                           | Quote(s) – people with SMD; or frontline staff                                                                                                                                                                                                                                                                                                                                                                                                                                                                                                                                                                                                                                                                                                                                                                                                                                                                                                                                                                                                                                                                                                                                                                                                                                                                                                                                                                                                                                                                                      |
|-----------------------|-----------------------------------|-----------------------------------------------------------------------------------------------------------------|-------------------------------------------------------------------------------------------------------------------------------------------------------------------------------------------------------------------------------------------------------------------------------------------------------------------------------------------------------------------------------------------------------------------------------------------------------------------------------------------------------------------------------------------------------------------------------------------------------------------------------------------------------------------------------------------------------------------------------------------------------------------------------------------------------------------------------------------------------------------------------------------------------------------------------------------------------------------------------------------------------------------------------------------------------------------------------------------------------------------------------------------------------------------------------------------------------------------------------------------------------------------------------------------------------------------------------------------------------------------------------------------------------------------------------------------------------------------------------------------------------------------------------------|
| Intervention settings | Physical settings                 | Housing stability, privacy, confidentiality                                                                     | <p>“This is kind of a stressful situation. People are homeless, being at the bottom of their luck, and—boom—and everything. So this is stress. What do you do? You drink, and you smoke, and that’s all that you can do, walking around here all day. Do you understand?”(person with SMD) (40)</p> <p>“But at the same time the addictions piece, especially in terms of stability, I’ve noticed a lot of the guys that because they are stable in our home, they may make the choice more often to say ‘I don’t feel like drinking tonight,’ so they don’t. They don’t have to get intoxicated to go to sleep in a shelter on a mat, they can choose not to drink and sometimes they do make that choice not to drink and just watch TV for the evening.”(frontline staff) (36)</p> <p>“If you went in and tried to do anything, people were behind you, over your shoulder, ‘what are you doing there’ And, you know, I didn’t what to discuss with people what I was doing, because they’d take the mick”(person with SMD) (33)</p>                                                                                                                                                                                                                                                                                                                                                                                                                                                                                             |
|                       | Psychological aspects of settings | Communication, trust building, familiarity, mentorship, community, peer pressure, guidance, support, safe space | <p>“It’s not just about dental treatment, I think for a lot of people there is the fear of the dentist because when they do go, it’s because they need work done and they’re in pain, therefore they associate pain with the dentist.”(frontline staff) (29)</p> <p>“She’s not somebody that normally expresses much in a group, she’s quite a private person, so I thought it took quite a lot for her to open up, to trust, but I also appreciate the fact that she felt she was in a really good space that she could share that experience with the others and I felt that was really valuable for the rest of the group to hear that. I think this activity [the workshops] encourages people to talk about their own experiences”(frontline staff)(28)</p> <p>“Yes. A lot better off because... I’m not like, like when I’m here and I’m here with people that are drinking on programs like this and stuff like that I’ve noticed we’re all on the same level. We don’t care about the issues or problems, we just, you know, pitch together and do what we gotta do to get ourselves fixed and then from there if we can help other people, and people help other people...”(person with SMD) (38)</p> <p>“If there is nobody there and you’re just left to get on with it, it’s quite easy to skip things...I will just put that answer down, you know. But then when you know somebody is there and they are there for that specific reason, then it’s a lot easier to go through with things.”(person with SMD) (33)</p> |
|                       | Accessibility                     | Point of contact, space, geography                                                                              | <p>“We were put in the medical room along the corridor from the office, but there was no opportunity for practitioner 4 to approach any of the residents. We only saw service users if they specifically wanted to talk about their oral health or if they had walker past the room and wanted to see who we were.” (frontline staff) (26)</p> <p>“I’m from a very rural area, and we don’t really have any homelessness centres.” (person with SMD) (25)</p>                                                                                                                                                                                                                                                                                                                                                                                                                                                                                                                                                                                                                                                                                                                                                                                                                                                                                                                                                                                                                                                                       |
| Intervention delivery | Improved Awareness                | Understandable, ideas, learning from one and another                                                            | <p>“Take things that people say and take it on board, and everything’s a learning curve, you learn things all the time... And I’d recommend that to anybody else who is homeless, just listen to other people, take on board what they’ve got to say, and accept the help that’s around you like the group activity [the workshops]”.(person with SMD) (28)</p> <p>“Especially when it was to do with what alcohol can do and what substances can do, I don’t think they realized how that affects their oral health, their ears pricked up when you said that” (frontline staff) (29)</p>                                                                                                                                                                                                                                                                                                                                                                                                                                                                                                                                                                                                                                                                                                                                                                                                                                                                                                                                          |

| Themes                                       | Subthemes                                                  | Codes                                                                                                            | Quote(s) – people with SMD; or frontline staff                                                                                                                                                                                                                                                                                                                                                                                                                                                                                                                                                                                                                                                                                                                                                                                                                                                                                                                                                                     |
|----------------------------------------------|------------------------------------------------------------|------------------------------------------------------------------------------------------------------------------|--------------------------------------------------------------------------------------------------------------------------------------------------------------------------------------------------------------------------------------------------------------------------------------------------------------------------------------------------------------------------------------------------------------------------------------------------------------------------------------------------------------------------------------------------------------------------------------------------------------------------------------------------------------------------------------------------------------------------------------------------------------------------------------------------------------------------------------------------------------------------------------------------------------------------------------------------------------------------------------------------------------------|
|                                              | Resources                                                  | Workloads, stress, competing needs, volunteers, equipment, funds                                                 | <p><i>"I think he [client] felt that maybe I would have to sit with him again and, I don't know, maybe I should have sat him down and had a talk with him and I just haven't been able to"</i>(frontline staff) (33)</p> <p><i>"You feel like you're spinning so many plates, that you just can't possibly keep them all up in the air"</i> (frontline staff) (25)</p> <p><i>"we need to attract funding ... it's very difficult to encourage NHS England to commission outside of their routine, the existing contract doesn't favour patients with high treatment needs so we would need them to step outside of their comfort zone and commission something slightly different to what they're used to"</i>(frontline staff) (32)</p>                                                                                                                                                                                                                                                                           |
|                                              | Perceived risks while working with a vulnerable population | Safety, unpredictable, inappropriate behavior, challenges, relevant experience, confident, challenging behaviors | <p><i>"Practitioner 1 is confident and appears quite fearless, putting up with language/behaviour that would not be tolerated in a normal clinic."</i> (researcher observation notes of frontline staff) (26)</p> <p><i>"Initially we were thinking 'oh we need to make sure that we're not alone in the surgery at any point', and we had a panic alarm and things, we still have all that in place, but it's actually been fine."</i>(frontline staff) (32)</p>                                                                                                                                                                                                                                                                                                                                                                                                                                                                                                                                                  |
| Ways to enhance engagement and participation | Interest and motivation                                    | Complexity, fears, initiative, specific and complex needs, mixed opinions                                        | <p><i>"[Mentor] came in and said 'I'm going home, have you done much?' And I said, 'I couldn't get back on, you know'. And she just took it [the laptop]. I don't know if she was fed up with me or whatever, but she never spoke about it again and I never mentioned it again."</i>(person with SMD) (33)</p> <p><i>"The oral health team do not seem bothered to recruit any patients, even if that means sitting waiting with nothing to do—the feeling seems to be that if a patient wants to be seen then they will come to the MDU."</i>(researcher observation notes of frontline staff) (26)</p> <p><i>"My goal is to quit within a month or two months. I talked to a couple of people. 'It ain't going to happen.' I said, 'well if you set your mind to certain things, you can do this."</i>(person with SMD) (40)</p> <p><i>"I think it's good. It made me feel like I had something to do or like I had a purpose. You know what I mean, not a purpose but it wasn't like the homeless"</i>(41)</p> |
|                                              | Adapt to specific circumstances                            | Context, tailored to the needs of the individual, personalized care                                              | <p><i>"People getting through the door, they might not have a roof, might not have any money, might have major drug and alcohol issues, might be threatened with violence, the last thing they want to talk about is their teeth."</i>(frontline staff) (29)</p> <p><i>"we call these people chaotic and that's a bit judgmental, they are actually setting priorities, they've got so much going on in their lives that it [oral health] just falls of their list of priorities, they're saying 'it's my priority to find somewhere to sleep tonight' ... The time that you catch people' was therefore identified as 'really important'."</i>(frontline staff) (32)</p>                                                                                                                                                                                                                                                                                                                                          |
|                                              | Constant support                                           | Long term care, advice, support                                                                                  | <p><i>"About three or four in the morning and I feel like upset then...I can come down and use the program, which is quite good because that way I can put stuff that is all jumbled up in my head down in a way that makes sense and it kind of makes you see that things aren't quite so bad as they seem."</i>(person with SMD) (33)</p> <p><i>"At the stage of having goals, an action plan and were working through that . . . but for some homeless people who are nowhere ready, you can make an average of seven appointments before they will turn up once, it's just where your client is at."</i>(frontline staff) (29)</p>                                                                                                                                                                                                                                                                                                                                                                             |

1  
2  
3 Synthesis of twelve papers with qualitative findings,(25, 26, 28, 29, 31, 32, 33, 36, 37, 38, 40, 41)  
4 identified three overarching themes in relation to the aims of this review. The three themes are: 1)  
5 Intervention settings, 2) Intervention delivery and 3) ways to enhance engagement and  
6 participation.  
7  
8  
9

### 10 **Theme 1: Intervention settings**

11  
12  
13 Eleven papers identified issues related to the settings of interventions which can play a role in the  
14 delivery of interventions targeting oral health, substance use and smoking.(25, 26, 27, 28, 32, 33, 36,  
15 37, 38, 40, 41)  
16

#### 17 *Physical settings*

18  
19  
20  
21 Physical settings involved the environment in which the intervention took place. The wider physical  
22 environment has been found to have an impact on the intervention experience,(41) with privacy  
23 being the key factor for improving physical settings.(32, 33, 41) Communal homeless shelters and  
24 busy teaching hospitals lack the space and privacy to deliver interventions involving discussions  
25 about difficult and sensitive topics.(32, 33, 41) Contrastingly, stable housing with the necessary  
26 privacy allowed people experiencing SMD to focus on their recovery journey, whilst also creating a  
27 space in which residents could spend time away from peers who were sometimes perceived as  
28 having a negative peer group influence.(36, 40)  
29  
30  
31  
32  
33

#### 34 *Psychological aspects of settings*

35  
36  
37 Psychological aspects related to the less visible parts of the interventions were identified across ten  
38 papers.(25, 26, 28, 29, 32, 33, 37, 38, 40, 41) Firstly, it was reported that relationships between  
39 people experiencing SMD and service providers played a vital part in the delivery of interventions.  
40 Through good communication,(26, 28, 32, 41) trust building,(28, 29, 32, 41) familiarity of working  
41 with a vulnerable population,(25, 32) and mentorship,(33, 37) interventions were able to form a  
42 'safe and respectable environment'.(28, 32, 37, 41) Secondly, papers discussed the importance of  
43 peer support as a way of increasing the effectiveness of interventions.(32, 37, 38) There were also  
44 reports of the impact negative peer influence could have on the recovery process. For example,  
45 smoking and drinking were linked to socializing with others, which could increase the urge to smoke  
46 or drink.(40, 41)  
47  
48  
49  
50  
51  
52  
53

#### 54 *Accessibility*

55  
56  
57 Accessibility of interventions was one of the factors found to be important related to  
58 implementation of interventions among people experiencing SMD.(25, 26, 32, 41) Firstly, accessible  
59  
60

1  
2  
3 and spacious meeting points within the services were reported to help with their participation in the  
4 intervention, especially in the case of oral health interventions that were delivered either in a  
5 community setup (open space) or a mobile dental van .(26) Secondly, geographical proximity could  
6 act as a barrier as rural and remote areas lack the facilities and resources, which could influence the  
7 access of people experiencing SMD.(25, 32) Lastly, it was reported that access could become an  
8 issue when service users move to more stable housing as weather conditions, distance, work and  
9 other appointments tend to make it challenging to attend the intervention sessions.(41)  
10  
11  
12  
13  
14

## 15 **Theme 2: Intervention delivery**

16  
17  
18 Nine papers discussed aspects such as information availability, resources and perceived risks of  
19 working with a vulnerable population that could be important for roll out and delivery of  
20 interventions addressing oral health, smoking and substance use.(25, 26, 28, 29, 31, 32, 33, 37, 41)  
21  
22

### 23 *Improved Awareness*

24  
25  
26 Awareness and information availability were discussed in papers focusing on improving oral health,  
27 smoking and alcohol use.(28, 29, 32, 41) Sharing information between service providers and SMD  
28 groups was identified as an important issue across the papers as it created opportunities to promote  
29 involvement and behavior change.(28, 29, 41) It was reported that easily understandable  
30 information encouraged people experiencing SMD to view healthier behaviors as important (e.g.  
31 tooth brushing) and helped to signpost them to necessary services.(28, 41) Clear and simple  
32 explanations of treatment options available was seen to help them in decision-making.(32) Service  
33 providers also felt that they learned more about healthy behaviors and were able to pass their newly  
34 gained knowledge to their clients.(29)  
35  
36  
37  
38  
39  
40

### 41 *Resources*

42  
43  
44 Five papers discussed the importance of having necessary resources to enable interventions to run  
45 efficiently and effectively.(25, 31, 32, 33, 37) The majority of these highlighted the importance of  
46 distribution of workloads among staff because of difficulties in implementing interventions with  
47 competing duties and work within the organizations.(25, 33, 37) Funding and resources such as  
48 volunteers and materials were identified in oral health interventions as an important issue that  
49 impacts implementation and long-term sustainability.(31, 32)  
50  
51  
52  
53

### 54 *Perceived risks working with a vulnerable population*

55  
56  
57 Papers reported on the perceived risks of delivering interventions to vulnerable populations as  
58 challenging at times by service providers.(25, 26, 32) There were concerns about safety of service  
59  
60

1  
2  
3 providers while interacting with clients who were seen to be “unpredictable”. The need for training  
4 and being better equipped to work in this environment and setting boundaries between service  
5 providers and clients was repeatedly mentioned by service providers.(25, 26, 32, 37) The papers also  
6 highlighted the importance of training opportunities that provide service providers with the  
7 necessary skills to handle volatile and difficult situations.(25, 37)  
8  
9

### 12 **Theme 3: Ways to enhance participation and engagement**

14 Ten papers identified factors such as interest and motivation levels, adaptability, and long-term  
15 support that could help to improve outcomes and create sustainable interventions by enhancing  
16 engagement and participation.(25, 26, 28, 29, 31, 32, 33, 37, 40, 41)  
17  
18

#### 20 *Interest and motivation*

22 Nine papers highlighted that the interest and motivation levels of both staff supporting SMD groups  
23 and people experiencing SMD play an important role in the implementation of interventions.  
24 Disinterest was sometimes observed amongst service providers, due to concerns about the  
25 complexity of delivering the intervention,(25, 29, 31) lack of engagement with third sector  
26 organizations,(26) poor uptake of the intervention by the target populations,(25, 29, 31) and  
27 preconceived notions of improper behaviour by SMD groups.(41) Interestingly, interventions were  
28 met with similar feelings of indifference by people experiencing SMD if the intervention did not  
29 address their specific and complex needs such as housing and financial problems.(25, 26, 32) Two  
30 papers on oral health interventions found that younger adults and families with children were more  
31 eager to engage compared to single men.(28, 29) Papers discussing the same smoking intervention  
32 illustrated that an awareness of health benefits and risks played a part in motivating people in  
33 engaging with the intervention.(40, 41)  
34  
35

#### 43 *Adapting to specific circumstances*

45 Adaptability of interventions was noted as an essential feature among four papers.(29, 32, 33, 40)  
46 Tailoring the interventions to address their specific needs at the time such as housing and  
47 employment was noted to increase participation and better outcomes.(29, 40) Service users of a  
48 community dental service also suggested flexible and longer dental appointments would be helpful  
49 and in the long-term these adaptations would help reduce missed appointments.(32) Another paper  
50 reported that people experiencing SMD were keen to have more face to face interactions rather  
51 than digital, which highlights the drive to more personalized care.(33)  
52  
53

#### 58 *Long term support*

1  
2  
3 Four papers identified sustained and long-term support as a factor that could contribute towards  
4 better intervention outcomes.(29, 32, 33, 37) Service providers expressed a need for interventions  
5 which allowed people experiencing SMD to continue with services/programmes despite missing  
6 appointments or not completing treatment within the required delivery timeframe especially  
7 because of the transitional nature of SMD groups.(32, 33) Similarly, for a substance reduction  
8 intervention, a preference for a long-term intervention, that allowed and supported them to  
9 gradually integrate into their new stage of their lives.(33, 37) Two papers on oral health  
10 interventions suggested that drop-in services offered flexibility in seeking advice or seeing a  
11 practitioner and helped to reduce anxiety surrounding accessing treatment for dental health.(29, 32)

### 19 **Synthesis of quantitative findings related to retention and implementation**

20  
21 Four papers reported quantitative findings on retention and program attendance,(30, 34, 35, 39) as  
22 indicators of uptake and sustained implementation of interventions.

23  
24  
25 Three papers on substance use interventions reported high levels of retention in their intervention  
26 groups.(34, 35, 39) Two studies among them delivered the interventions along with housing services  
27 but the findings were mixed and limited on whether retention was significantly associated with the  
28 housing services or not. (34, 35, 39)

29  
30  
31  
32  
33 There was no difference in the attendance levels in the studies related to substance use  
34 interventions.(34, 35) The attendance level for an oral health promotion intervention delivered in  
35 community settings was high (85%), however it varied across community centers and was  
36 dependent on timing of appointment and dental treatments offered. More non-attendance seen for  
37 afternoon appointments and complex dental treatments (e.g. surgical and prosthodontic  
38 treatments).(30)

39  
40  
41  
42  
43 Additionally, workplace beliefs and practices amongst service providers such as knowledge,  
44 intention and goals, were reported to influence implementation behaviors.(27)

### 47 **DISCUSSION**

48  
49  
50 This review synthesized different factors that could influence the implementation and sustainability  
51 of interventions related to improving oral health and related health behaviors of people  
52 experiencing SMD. Evidence suggested that psychological aspects of intervention settings such as  
53 building trust and communication form an integral part in the creating a safe environment and that  
54 these are just as essential as the structural components of settings such as physical environment.  
55 Review findings further suggest that adequate staff capacity, funding and equipment would ease the  
56 delivery of interventions by reducing the immense pressure faced by service providers supporting  
57  
58  
59  
60



1  
2  
3 the interventions. It was also suggested that implementation is dependent on the interest and  
4 motivation of not only people experiencing SMD but also on that of service providers in delivering  
5 difficult and complex interventions.  
6  
7

8  
9 Most of the included studies were related to oral health and substance use (drug and alcohol). There  
10 was a lack of evidence on diet and smoking interventions among this population. Previous evidence  
11 has shown that tobacco use and poor diet, often due to limited choice available while experiencing  
12 homelessness and related disadvantages, result in a range of adverse short term (nutritional  
13 deficiencies) and long term health outcomes (cancer, diabetes, heart disease).(42, 43, 44) Food  
14 insecurity is often linked to elevated tobacco use, mental health issues and an increased risk of  
15 substance misuse.(45, 46, 47)  
16  
17

18  
19 While most of the papers mainly focused on the perspectives of people experiencing SMD, the  
20 limited data from service providers brought to light some of the challenges faced during  
21 implementation. This supports the notion that intervention implementation needs the co-ordination  
22 and collective effort of everyone involved. All the interventions included were designed focussing on  
23 service provision,(25, 26, 27, 28, 30, 31, 32, 33, 34, 35, 37, 38, 39, 40, 41, 48) except for one study  
24 which focussed on a training intervention for service providers (29).Limited evidence was available  
25 on the long-term sustainability of interventions, which highlights another evidence gap that needs to  
26 be addressed.  
27  
28

29  
30 Our review findings suggest that the retention in interventions may depend on the type of treatment  
31 offered, which at times can be influenced by the availability of housing provision. Timing and type of  
32 treatment may also influence attendance rates; for instance, morning appointments might be more  
33 beneficial, especially for individuals struggling with alcohol addiction, as they may be less intoxicated  
34 compared to later in the day. Our review findings also complement our systematic review about the  
35 effectiveness of interventions that improve oral health and related health behaviors in SMD groups –  
36 the effectiveness review found that interventions that integrated health with the individual's wider  
37 needs (for e.g. housing, employment, mental health) were more effective than usual care.(49) The  
38 findings we have are very limited regarding retention and attendance, more effort needs to be taken  
39 to understand how to improve reach and retention among SMD groups so that they can access and  
40 use the interventions efficiently.  
41  
42

43  
44 A systematic review on access to dental care among individuals experiencing homelessness in the UK  
45 identified similar findings around awareness, accessibility and organizational issues (lack of financial  
46 resources and collaboration between sectors) having an influence on implementation.(50) This was  
47 also similarly identified in another review on smoking cessation among homeless populations in  
48  
49  
50  
51  
52  
53  
54  
55  
56  
57  
58  
59  
60

1  
2  
3 high-income countries.(51) The importance of continued engagement in services was highlighted in  
4 a review on substance use support for young people (ages 12 to 24) experiencing homelessness,  
5 which was also reflected in our findings.(52) Existing literature on interventions targeting health  
6 conditions such as HIV and Hepatitis C in this population have shown that improved health outcomes  
7 are linked to increased awareness, establishment of positive relationships with service providers and  
8 integrated treatment involving other health behaviours.(53, 54, 55)  
9  
10  
11  
12

13  
14 Some findings from our review on aspects related to intervention settings, and intervention delivery  
15 aligned with CFIR constructs of Inner and Outer settings domains.(14) Subthemes in our findings on  
16 ways to enhance engagement, aligns with both Individuals and Implementation process  
17 domains.(14) The use of CFIR framework helps us understand the impact of intervention settings,  
18 delivery methods and engagement on the implementation process. It also provides a comprehensive  
19 approach for guiding the development of interventions targeting SMD groups and improving their  
20 efficacy in practical settings.  
21  
22  
23  
24  
25

### 26 **Strengths and Limitations**

27  
28 This systematic review is novel in that it assesses the implementation and sustainability of  
29 interventions on oral health together with co-occurring and related health behaviors in people  
30 experiencing SMD. It addresses an evidence gap on interventions targeting these health challenges  
31 and identifies ways to overcome implementation issues faced by these specific interventions.  
32 Another strength of this review lies in its comprehensive search strategy and use of a published tool  
33 (i.e. CFIR) to make sense of the results. It also highlights gaps in the evidence base on interventions  
34 related to diet, as well as studies that include repeat offenders. However, the confidence in the  
35 evidence from this review is limited as most of the papers were of moderate quality. Studies lacked  
36 detailed data collection methods and standardized evaluations which influenced their quality.  
37 Another limitation of this work is that intersectionality was not considered explicitly during the  
38 analysis of the data. Furthermore, the findings may not be generalizable to all contexts since the  
39 included papers were from high-income countries.  
40  
41  
42  
43  
44  
45  
46  
47  
48

### 49 **Implications**

50  
51 These findings offer valuable insights for enhancing existing interventions by paying attention to  
52 settings, delivery, and engagement opportunities. Evidence from this review points to the need for  
53 additional research on interventions targeting smoking and diet. These areas hold significant value  
54 due to their direct links with general and oral health. It is also important for interventions to address  
55 not only individual behaviours but also overlapping behaviours of substance use, smoking and poor  
56  
57  
58  
59  
60

1  
2  
3 diet. This could help reduce the strain on resources and improve engagement. Furthermore, higher  
4 quality research that focuses more on sustainability and intersectionality is warranted to further  
5 investigate and refine interventions focused on SMD groups.  
6  
7  
8  
9  
10

### 11 **Author Contributions**

12  
13 Conceptualization: SER, EK, EAA, CB, RGW, ECJ, LJM, FB, DC, DL, MP, FFS; methodology: SER, DAJ,  
14 LJM, EAA, ECJ, CR, EK, DC, FB; draft preparation: SER, DAJ, EAA; writing - review and editing all;  
15 funding acquisition: SER, EK, FB, CB, RGW, DC, DL, MP, FFS.  
16  
17  
18

### 19 **Ethical approval**

20  
21 None sought.  
22  
23

### 24 **Data Availability Statement**

25  
26 No data are available.  
27  
28

### 29 **Funding Statement**

30  
31 This project is funded by the National Institute for Health and Care Research (NIHR) Policy Research  
32 Programme (NIHR200415). EAA was supported by the National Institute for Health and Care  
33 Research (NIHR) School for Public Health Research (SPHR) Pre-doctoral Fellowship, Grant Reference  
34 Number PD-SPH-2015. EK is supported by an NIHR Senior Investigator award and directs the NIHR  
35 funded Applied Research Collaboration North East and North Cumbria.  
36  
37  
38

### 39 **Conflicts of Interest**

40  
41  
42 The authors declare no conflict of interest. The funders had no role in the design of the study; in the  
43 collection, analyses, or interpretation of data; in the writing of the manuscript, or in the decision to  
44 publish the results.  
45  
46  
47

### 48 **Word Count**

49  
50 3329 words  
51  
52

53 **Figure 1:** *PRISMA Flowchart for the search results.*  
54  
55  
56  
57  
58  
59

### 60 **References:**

1. Bramley G, Fitzpatrick S, Edwards J, et al. Hard edges: mapping severe and multiple disadvantage in England. 2015.
2. Sandu RD. Defining severe and multiple disadvantage from the inside: Perspectives of young people and of their support workers. *Journal of Community Psychology*. 2021;49(5):1470-86.
3. Rae BE, Rees S. The perceptions of homeless people regarding their healthcare needs and experiences of receiving health care. *Journal of Advanced Nursing*. 2015;71(9):2096-107.
4. Conte M, Broder HL, Jenkins G, et al. Oral Health, Related Behaviors and Oral Health Impacts Among Homeless Adults. *J Public Health Dent*. 2006;66(4):276-8.
5. Hertzberg D, Boobis S. Unhealthy State of Homelessness 2022: Findings from the Homeless Health Needs Audit. 2022.
6. Groundswell. *Healthy Mouths: A peer-led health audit on the oral health of people experiencing homelessness*. London Groundswell; 2017.
7. Evans NS, Dowler EA. Food, health and eating among single homeless and marginalized people in London. *Journal of Human Nutrition and Dietetics*. 1999;12(3):179-99.
8. Sheiham A. Oral health, general health and quality of life. *SciELO Public Health*; 2005. p. 644-.
9. Wiecha JL, Dwyer JT, Dunn-Strohecker M. Nutrition and health services needs among the homeless. *Public Health Rep*. 1991;106(4):364-74.
10. Beaton L, Humphris G, Rodriguez A, et al. Community-based oral health interventions for people experiencing homelessness: a scoping review. *Community Dent Health*. 2020;37(2):150-60.
11. Hwang SW, Tolomiczenko G, Kouyoumdjian FG, et al. Interventions to improve the health of the homeless: a systematic review. *American journal of preventive medicine*. 2005;29(4):311-. e75.
12. Speirs V, Johnson M, Jirojwong S. A systematic review of interventions for homeless women. *Journal of Clinical Nursing*. 2013;22(7-8):1080-93.
13. Damschroder LJ, Aron DC, Keith RE, et al. Fostering implementation of health services research findings into practice: a consolidated framework for advancing implementation science. *Implementation Science*. 2009;4(1):50.
14. Damschroder LJ, Reardon CM, Widerquist MAO, et al. The updated Consolidated Framework for Implementation Research based on user feedback. *Implementation Science*. 2022;17(1):75.
15. Shelton RC, Cooper BR, Stirman SW. The Sustainability of Evidence-Based Interventions and Practices in Public Health and Health Care. *Annual Review of Public Health*. 2018;39(1):55-76.
16. McGowan L, Joyes E, Adams E, et al. Systematic review of oral health and related health behaviour interventions in adults with severe and multiple disadvantages. PROSPERO. 2020.
17. McGowan LJ, Joyes EC, Adams EA, et al. Investigating the Effectiveness and Acceptability of Oral Health and Related Health Behaviour Interventions in Adults with Severe and Multiple Disadvantage: Protocol for a Mixed-Methods Systematic Review. *Int J Environ Res Public Health*. 2021;18(21).
18. Page MJ, Moher D, Bossuyt PM, et al. PRISMA 2020 explanation and elaboration: updated guidance and exemplars for reporting systematic reviews. *BMJ*. 2021;372:n160.

19. Covidence. Covidence Systematic Review Software.
20. Programme. CAS. CASP Qualitative Checklist 2022 [Available from: <https://casp-uk.net/casp-tools-checklists>].
21. Higgins JP, Thomas J, Chandler J, et al. Cochrane handbook for systematic reviews of interventions: John Wiley & Sons; 2019.
22. National Heart LaBI. Study quality assessment tool for observational and cross sectional studies 2021 [Available from: <https://www.nhlbi.nih.gov/health-topics/study-quality-assessment-tools>].
23. Butler A, Hall H, Copnell B. A Guide to Writing a Qualitative Systematic Review Protocol to Enhance Evidence-Based Practice in Nursing and Health Care. *Worldviews Evid Based Nurs*. 2016;13(3):241-9.
24. Saini M, Shlonsky A. *Systematic synthesis of qualitative research*: OUP USA; 2012.
25. Beaton L, Freeman R. Oral health promotion and homelessness: A theory-based approach to understanding processes of implementation and adoption. *Health Education Journal*. 2016;75(2):184-97.
26. Beaton L, Anderson I, Humphris G, et al. Implementing an Oral Health Intervention for People Experiencing Homelessness in Scotland: A Participant Observation Study. *Dent J (Basel)*. 2018;6(4).
27. Beaton L, Humphris G, Rodriguez A, et al. Implementing the Smile4life intervention for people experiencing homelessness: a path analytical evaluation. *BMC Oral Health*. 2021;21(1):383.
28. Rodriguez A, Beaton L, Freeman R. Strengthening Social Interactions and Constructing New Oral Health and Health Knowledge: The Co-design, Implementation and Evaluation of A Pedagogical Workshop Program with and for Homeless Young People. *Dent J (Basel)*. 2019;7(1).
29. Coles E, Watt C, Freeman R. 'Something to Smile About': An evaluation of a capacity-building oral health intervention for staff working with homeless people. *Health Education Journal*. 2012;72(2):146-55.
30. Stormon N, Pradhan A, McAuliffe A, et al. Does a facilitated pathway improve access to dental services for homeless and disadvantaged adults? Evaluation and program planning. 2018;71:46-50.
31. Doughty J, Johnson A, Tatari A, et al. A pilot denture service collaboration between Den-Tech denture charity and Crisis at Christmas Dental Service (CCDS): A Plan-Do-Study-Act analysis. *British Dental Journal*. 2020;228(3):183-90.
32. Paisi M, Baines R, Worle C, et al. Evaluation of a community dental clinic providing care to people experiencing homelessness: A mixed methods approach. *Health Expectations*. 2020;23(5):1289-99.
33. Neale J, Stevenson C. Positive and negative features of a computer assisted drug treatment program delivered by mentors to homeless drug users living in hostels. *Journal of substance abuse treatment*. 2014;47(4):258-64.
34. Burnam MA, Morton SC, McGlynn EA, et al. An experimental evaluation of residential and nonresidential treatment for dually diagnosed homeless adults. *J Addict Dis*. 1995;14(4):111-34.
35. Collins SE, Clifasefi SL, Nelson LA, et al. Randomized controlled trial of harm reduction treatment for alcohol (HaRT-A) for people experiencing homelessness and alcohol use disorder. *Int J Drug Policy*. 2019;67:24-33.

- 1
- 2
- 3
- 4 36. Forchuk C, Richardson J, Atyeo H, et al. Qualitative findings from a Housing First
- 5 evaluation project for homeless Veterans in Canada. *Journal of Military, Veteran and Family*
- 6 *Health*. 2022;8(2):27-38.
- 7 37. Henderson PM. Program evaluation of a long-term substance abuse treatment
- 8 program for homeless men: Spalding University; 2003.
- 9 38. Pauly B, King V, Smith A, et al. Breaking the cycle of survival drinking: insights from a
- 10 non-residential, peer-initiated and peer-run managed alcohol program. *Drugs: Education,*
- 11 *Prevention and Policy*. 2021;28(2):172-80.
- 12 39. Rash CJ, Alessi SM, Petry NM. Substance abuse treatment patients in housing
- 13 programs respond to contingency management interventions. *J Subst Abuse Treat*.
- 14 2017;72:97-102.
- 15 40. Pratt R, Pernat C, Kerandi L, et al. "It's a hard thing to manage when you're
- 16 homeless": the impact of the social environment on smoking cessation for smokers
- 17 experiencing homelessness. *BMC Public Health*. 2019;19(1):1-8.
- 18 41. Pratt R, Xiong S, Kmiecik A, et al. The implementation of a smoking cessation and
- 19 alcohol abstinence intervention for people experiencing homelessness. *BMC public health*.
- 20 2022;22(1):1260.
- 21 42. Baggett TP, Singer DE, Rao SR, et al. Food Insecurity and Health Services
- 22 Utilization in a National Sample of Homeless Adults. *Journal of General Internal Medicine*.
- 23 2011;26(6):627-34.
- 24 43. Fallaize R, Seale JV, Mortin C, et al. Dietary intake, nutritional status and mental
- 25 wellbeing of homeless adults in Reading, UK. *British Journal of Nutrition*. 2017;118(9):707-
- 26 14.
- 27 44. Okuyemi KS, Caldwell AR, Thomas JL, et al. Homelessness and Smoking Cessation:
- 28 Insights from Focus Groups. *Nicotine Tob Res*. 2006;8(2):287-96.
- 29 45. Langnäse K, Müller MJ. Nutrition and health in an adult urban homeless population
- 30 in Germany. *Public Health Nutrition*. 2001;4(3):805-11.
- 31 46. Knudsen HK. Implementation of smoking cessation treatment in substance use
- 32 disorder treatment settings: a review. *The American Journal of Drug and Alcohol Abuse*.
- 33 2017;43(2):215-25.
- 34 47. Kim JE, Flentje A, Tsoh JY, et al. Cigarette Smoking among Women Who Are
- 35 Homeless or Unstably Housed: Examining the Role of Food Insecurity. *J Urban Health*.
- 36 2017;94(4):514-24.
- 37 48. Beaton L, Anderson I, Humphris G, et al. Implementing an Oral Health Intervention
- 38 for People Experiencing Homelessness in Scotland: A Participant Observation Study.
- 39 *Dentistry Journal*. 2018;6(4):68.
- 40 49. McGowan LJ, John DA, Kenny RPW, et al. Interventions to improve oral health and
- 41 related health behaviours of substance use, smoking and diet in people with severe and
- 42 multiple disadvantage: a systematic review of effectiveness and cost-effectiveness. 2023.
- 43 50. Paisi M, Kay E, Plessas A, et al. Barriers and enablers to accessing dental services for
- 44 people experiencing homelessness: A systematic review. *Community dentistry and oral*
- 45 *epidemiology*. 2019;47(2):103-11.
- 46 51. Soar K, Dawkins L, Robson D, et al. Smoking amongst adults experiencing
- 47 homelessness: a systematic review of prevalence rates, interventions and the barriers and
- 48 facilitators to quitting and staying quit. *Journal of Smoking Cessation*. 2020;15(2):94-108.
- 49 52. Xiang X. A review of interventions for substance use among homeless youth.
- 50 *Research on Social Work Practice*. 2013;23(1):34-45.
- 51
- 52
- 53
- 54
- 55
- 56
- 57
- 58
- 59
- 60

- 1  
2  
3 53. Nyamathi A, Kennedy B, Branson C, et al. Impact of Nursing Intervention on  
4 Improving HIV, Hepatitis Knowledge and Mental Health Among Homeless Young Adults.  
5 Community Mental Health Journal. 2013;49(2):178-84.  
6  
7 54. Young SD, Rice E. Online social networking technologies, HIV knowledge, and sexual  
8 risk and testing behaviors among homeless youth. AIDS and Behavior. 2011;15:253-60.  
9  
10 55. Slesnick N, Kang MJ. The impact of an integrated treatment on HIV risk behavior  
11 among homeless youth: a randomized controlled trial. Journal of behavioral medicine.  
12 2008;31:45-59.  
13  
14  
15  
16  
17  
18  
19  
20  
21  
22  
23  
24  
25  
26  
27  
28  
29  
30  
31  
32  
33  
34  
35  
36  
37  
38  
39  
40  
41  
42  
43  
44  
45  
46  
47  
48  
49  
50  
51  
52  
53  
54  
55  
56  
57  
58  
59  
60

For peer review only





## SMD Project – Search updates February 2023

Database(s): **Ovid MEDLINE(R) and Epub Ahead of Print, In-Process, In-Data-Review & Other Non-Indexed Citations, Daily and Versions** 1946 to January 30<sup>th</sup> 2023 (Search run 3<sup>rd</sup> February 2023)

Search Strategy:

| #  | Searches                                                                                                                     | Results |
|----|------------------------------------------------------------------------------------------------------------------------------|---------|
| 1  | Oral Hygiene/                                                                                                                | 13719   |
| 2  | Mouth Rehabilitation/                                                                                                        | 1470    |
| 3  | Oral Health/                                                                                                                 | 19795   |
| 4  | exp Dental Health Services/                                                                                                  | 39658   |
| 5  | ((dental or oral or tooth or teeth or mouth) adj3 (health or care or hygiene or rehabilitation)).ti,ab,kw.                   | 71845   |
| 6  | or/1-5                                                                                                                       | 105093  |
| 7  | Smoking/                                                                                                                     | 147692  |
| 8  | (smoking or cigarette* or tobacco).ti,ab,kw.                                                                                 | 346981  |
| 9  | exp "Tobacco Use"/                                                                                                           | 9080    |
| 10 | Alcohol Drinking/                                                                                                            | 74302   |
| 11 | Alcoholism/                                                                                                                  | 79526   |
| 12 | Alcoholics/                                                                                                                  | 871     |
| 13 | (alcoholic* adj3 (person or people or adult or parent* or family)).ti,ab,kw.                                                 | 947     |
| 14 | "street drink*".ti,ab,kw.                                                                                                    | 8       |
| 15 | exp Substance-Related Disorders/                                                                                             | 306459  |
| 16 | exp Drug users/                                                                                                              | 3922    |
| 17 | Behavior, Addictive/                                                                                                         | 12185   |
| 18 | ((alcohol or drug* or substance*) adj2 (misuse* or abuse* or use* or addict* or dependenc* or issue* or problem*)).ti,ab,kw. | 314183  |
| 19 | (drug adj1 (habit or tak* or hard or illicit or inject*)).ti,ab,kw.                                                          | 25327   |
| 20 | or/7-19                                                                                                                      | 873304  |
| 21 | ((sugar or sucrose or fructose or glucose) adj2 (intake or consum*)).ti,ab,kw.                                               | 16517   |

|    |                                                                                                                                                                                                                                                                                                                                                                                                                                                                                                                                                                                                                                                                                                                   |         |
|----|-------------------------------------------------------------------------------------------------------------------------------------------------------------------------------------------------------------------------------------------------------------------------------------------------------------------------------------------------------------------------------------------------------------------------------------------------------------------------------------------------------------------------------------------------------------------------------------------------------------------------------------------------------------------------------------------------------------------|---------|
| 22 | diet*.ti,ab,kw.                                                                                                                                                                                                                                                                                                                                                                                                                                                                                                                                                                                                                                                                                                   | 665093  |
| 23 | "sugary food*".ti,ab,kw.                                                                                                                                                                                                                                                                                                                                                                                                                                                                                                                                                                                                                                                                                          | 328     |
| 24 | exp Dietary Sugars/ or Diet/                                                                                                                                                                                                                                                                                                                                                                                                                                                                                                                                                                                                                                                                                      | 186792  |
| 25 | ((processed or acidic) adj1 food*).ti,ab,kw.                                                                                                                                                                                                                                                                                                                                                                                                                                                                                                                                                                                                                                                                      | 5331    |
| 26 | ((sugary or fizzy or carbonated or soft) adj1 drink*).ti,ab,kw.                                                                                                                                                                                                                                                                                                                                                                                                                                                                                                                                                                                                                                                   | 5449    |
| 27 | carbonated beverages/ or sugar-sweetened beverages/                                                                                                                                                                                                                                                                                                                                                                                                                                                                                                                                                                                                                                                               | 3952    |
| 28 | soda.ti,ab,kw.                                                                                                                                                                                                                                                                                                                                                                                                                                                                                                                                                                                                                                                                                                    | 4878    |
| 29 | or/21-28                                                                                                                                                                                                                                                                                                                                                                                                                                                                                                                                                                                                                                                                                                          | 738771  |
| 30 | (severe and multiple disadvantage*).ti,ab,kw.                                                                                                                                                                                                                                                                                                                                                                                                                                                                                                                                                                                                                                                                     | 11      |
| 31 | Homeless Persons/                                                                                                                                                                                                                                                                                                                                                                                                                                                                                                                                                                                                                                                                                                 | 9442    |
| 32 | homeless*.ti,ab,kw.                                                                                                                                                                                                                                                                                                                                                                                                                                                                                                                                                                                                                                                                                               | 13348   |
| 33 | ((hous* or home* or accommodat* or shelter) adj3 (insecur* or instability or unstable or stability)).ti,ab,kw.                                                                                                                                                                                                                                                                                                                                                                                                                                                                                                                                                                                                    | 4473    |
| 34 | or/30-33                                                                                                                                                                                                                                                                                                                                                                                                                                                                                                                                                                                                                                                                                                          | 18951   |
| 35 | (probationer* or parolee* or ((repeat* or ex or re or revolving door or habitual or multiple or former* or previously*) adj1 (offen* or convict* or prisoner* or imprison* or incarcerat* or criminal*)) or (former adj3 inmate*) or ((community or probation* or parole* or reintegrat*) adj4 (prison* or offender* or criminal* or convict* or inmate*)) or ((individuals or men or women) adj2 (probation or parole)) or ((reintegrate* or reent* or return*) adj3 community)).ti,ab,kw.                                                                                                                                                                                                                       | 4639    |
| 36 | "criminal justice".ti,ab,kw.                                                                                                                                                                                                                                                                                                                                                                                                                                                                                                                                                                                                                                                                                      | 5400    |
| 37 | or/35-36                                                                                                                                                                                                                                                                                                                                                                                                                                                                                                                                                                                                                                                                                                          | 9464    |
| 38 | ((program* or policy or policies or strateg* or scheme* or project* or initiative* or "care package" or training or educat* or pilot or guidance or guideline* or study or pathway or treatment* or promot* or management or "support group" or process* or trial* or intervention*) adj5 (evaluat* or effect* or measur* or assess* or experiment* or impact* or feasab* or acceptab* or efficacy or perception* or belief* or uptake or consequence* or attitud* or barrier* or facilit* or motivat* or experience* or implement* or adher* or retention or retain* or reduc* or increas* or improv* or outcome* or cost* or benefit* or interview* or qualitative or ethnograph* or "focus group*")).ti,ab,kw. | 5409160 |
| 39 | "housing first".ti,ab,kw.                                                                                                                                                                                                                                                                                                                                                                                                                                                                                                                                                                                                                                                                                         | 388     |
| 40 | (outcome* adj5 evaluat*).ti,ab,kw.                                                                                                                                                                                                                                                                                                                                                                                                                                                                                                                                                                                                                                                                                | 106574  |

|    |                                |         |
|----|--------------------------------|---------|
| 41 | or/38-40                       | 5450432 |
| 42 | (34 or 37) and (6 or 20 or 29) | 10263   |
| 43 | 41 and 42                      | 5069    |

Database(s): **Embase** 1974 to 2023 January 30 (Search run 3<sup>rd</sup> January 2023)

Search Strategy:

| #  | Searches                                                                                                                     | Results |
|----|------------------------------------------------------------------------------------------------------------------------------|---------|
| 1  | mouth hygiene/                                                                                                               | 30848   |
| 2  | full mouth rehabilitation/                                                                                                   | 367     |
| 3  | dental health/                                                                                                               | 4854    |
| 4  | dental procedure/                                                                                                            | 30979   |
| 5  | dental practice/ or dental prevention/ or exp dental restoration/                                                            | 69380   |
| 6  | ((dental or oral or tooth or teeth or mouth) adj3 (health or care or hygiene or rehabilitation)).ti,ab,kw.                   | 74077   |
| 7  | or/1-6                                                                                                                       | 169561  |
| 8  | smoking/                                                                                                                     | 360231  |
| 9  | (smoking or cigarette* or tobacco).ti,ab,kw.                                                                                 | 482602  |
| 10 | "tobacco use"/                                                                                                               | 16485   |
| 11 | drinking behavior/                                                                                                           | 54555   |
| 12 | alcoholism/                                                                                                                  | 128949  |
| 13 | (alcoholic* adj3 (person or people or adult or parent* or family)).ti,ab,kw.                                                 | 1320    |
| 14 | "street drink*".ti,ab,kw.                                                                                                    | 15      |
| 15 | exp drug dependence/                                                                                                         | 266514  |
| 16 | addiction/                                                                                                                   | 50440   |
| 17 | ((alcohol or drug* or substance*) adj2 (misuse* or abuse* or use* or addict* or dependenc* or issue* or problem*)).ti,ab,kw. | 438421  |
| 18 | (drug adj1 (habit or tak* or hard or illicit or inject*)).ti,ab,kw.                                                          | 33544   |
| 19 | or/8-18                                                                                                                      | 1177022 |

|    |                                                                                                                                                                                                                                                                                                                                                                                                                                                                                                                                                                                                                                                                                                                   |         |
|----|-------------------------------------------------------------------------------------------------------------------------------------------------------------------------------------------------------------------------------------------------------------------------------------------------------------------------------------------------------------------------------------------------------------------------------------------------------------------------------------------------------------------------------------------------------------------------------------------------------------------------------------------------------------------------------------------------------------------|---------|
| 20 | ((sugar or sucrose or fructose or glucose) adj2 (intake or consum*)).ti,ab,kw.                                                                                                                                                                                                                                                                                                                                                                                                                                                                                                                                                                                                                                    | 21137   |
| 21 | diet*.ti,ab,kw.                                                                                                                                                                                                                                                                                                                                                                                                                                                                                                                                                                                                                                                                                                   | 830039  |
| 22 | "sugary food*".ti,ab,kw.                                                                                                                                                                                                                                                                                                                                                                                                                                                                                                                                                                                                                                                                                          | 432     |
| 23 | sugar intake/                                                                                                                                                                                                                                                                                                                                                                                                                                                                                                                                                                                                                                                                                                     | 9669    |
| 24 | diet/                                                                                                                                                                                                                                                                                                                                                                                                                                                                                                                                                                                                                                                                                                             | 244115  |
| 25 | ((processed or acidic) adj1 food*).ti,ab,kw.                                                                                                                                                                                                                                                                                                                                                                                                                                                                                                                                                                                                                                                                      | 6402    |
| 26 | ((sugary or fizzy or carbonated or soft) adj1 drink*).ti,ab,kw.                                                                                                                                                                                                                                                                                                                                                                                                                                                                                                                                                                                                                                                   | 7130    |
| 27 | carbonated beverage/                                                                                                                                                                                                                                                                                                                                                                                                                                                                                                                                                                                                                                                                                              | 3672    |
| 28 | sugar-sweetened beverage/                                                                                                                                                                                                                                                                                                                                                                                                                                                                                                                                                                                                                                                                                         | 2782    |
| 29 | or/20-28                                                                                                                                                                                                                                                                                                                                                                                                                                                                                                                                                                                                                                                                                                          | 902120  |
| 30 | (severe and multiple disadvantage*).ti,ab,kw.                                                                                                                                                                                                                                                                                                                                                                                                                                                                                                                                                                                                                                                                     | 14      |
| 31 | exp homeless person/                                                                                                                                                                                                                                                                                                                                                                                                                                                                                                                                                                                                                                                                                              | 3638    |
| 32 | homeless*.ti,ab,kw.                                                                                                                                                                                                                                                                                                                                                                                                                                                                                                                                                                                                                                                                                               | 16533   |
| 33 | ((hous* or home* or accommodat* or shelter) adj3 (insecur* or instability or unstable or stability)).ti,ab,kw.                                                                                                                                                                                                                                                                                                                                                                                                                                                                                                                                                                                                    | 5665    |
| 34 | or/30-33                                                                                                                                                                                                                                                                                                                                                                                                                                                                                                                                                                                                                                                                                                          | 21932   |
| 35 | (probationer* or parolee* or ((repeat* or ex or re or revolving door or habitual or multiple or former* or previously*) adj1 (offen* or convict* or prisoner* or imprison* or incarcerat* or criminal*)) or (former adj3 inmate*) or ((community or probation* or parole* or reintegrat*) adj4 (prison* or offender* or criminal* or convict* or inmate*)) or ((individuals or men or women) adj2 (probation or parole)) or ((reintegrate* or reent* or return*) adj3 community)).ti,ab,kw.                                                                                                                                                                                                                       | 5563    |
| 36 | "criminal justice".ti,ab,kw.                                                                                                                                                                                                                                                                                                                                                                                                                                                                                                                                                                                                                                                                                      | 6462    |
| 37 | or/35-36                                                                                                                                                                                                                                                                                                                                                                                                                                                                                                                                                                                                                                                                                                          | 11379   |
| 38 | ((program* or policy or policies or strateg* or scheme* or project* or initiative* or "care package" or training or educat* or pilot or guidance or guideline* or study or pathway or treatment* or promot* or management or "support group" or process* or trial* or intervention*) adj5 (evaluat* or effect* or measur* or assess* or experiment* or impact* or feasab* or acceptab* or efficacy or perception* or belief* or uptake or consequence* or attitud* or barrier* or facilit* or motivat* or experience* or implement* or adher* or retention or retain* or reduc* or increas* or improv* or outcome* or cost* or benefit* or interview* or qualitative or ethnograph* or "focus group*")).ti,ab,kw. | 7390414 |

|    |                                    |         |
|----|------------------------------------|---------|
| 39 | "housing first".ti,ab,kw.          | 444     |
| 40 | (outcome* adj5 evaluat*).ti,ab,kw. | 168129  |
| 41 | or/38-40                           | 7453916 |
| 42 | (34 or 37) and (7 or 19 or 29)     | 12372   |
| 43 | 41 and 42                          | 6384    |

Database(s): **APA PsycInfo** 1806 to January Week 4 2023 (Search run 3<sup>rd</sup> February 2023)

Search Strategy:

| #  | Searches                                                                                                                  | Results |
|----|---------------------------------------------------------------------------------------------------------------------------|---------|
| 1  | exp oral health/                                                                                                          | 1890    |
| 2  | exp dental health/                                                                                                        | 594     |
| 3  | ((dental or oral or tooth or teeth or mouth) adj3 (health or care or hygiene or rehabilitation)).ti,ab.                   | 3199    |
| 4  | or/1-3                                                                                                                    | 3613    |
| 5  | tobacco smoking/                                                                                                          | 35146   |
| 6  | (smoking or cigarette* or tobacco).ti,ab.                                                                                 | 69114   |
| 7  | alcohol drinking patterns/                                                                                                | 26122   |
| 8  | Alcoholism/                                                                                                               | 30862   |
| 9  | alcohol abuse/                                                                                                            | 19136   |
| 10 | (alcoholic* adj3 (person or people or adult or parent* or family)).ti,ab.                                                 | 1753    |
| 11 | "street drink*".ti,ab.                                                                                                    | 19      |
| 12 | "substance use disorder"/                                                                                                 | 10378   |
| 13 | drug abuse/                                                                                                               | 49214   |
| 14 | drug addiction/                                                                                                           | 11973   |
| 15 | addiction/                                                                                                                | 12827   |
| 16 | ((alcohol or drug* or substance*) adj2 (misuse* or abuse* or use* or addict* or dependenc* or issue* or problem*)).ti,ab. | 183254  |
| 17 | (drug adj1 (habit or tak* or hard or illicit or inject*)).ti,ab.                                                          | 12930   |

|    |                                                                                                                                                                                                                                                                                                                                                                                                                                                                                                                                                                                                                                                                                                                |         |
|----|----------------------------------------------------------------------------------------------------------------------------------------------------------------------------------------------------------------------------------------------------------------------------------------------------------------------------------------------------------------------------------------------------------------------------------------------------------------------------------------------------------------------------------------------------------------------------------------------------------------------------------------------------------------------------------------------------------------|---------|
| 18 | or/5-17                                                                                                                                                                                                                                                                                                                                                                                                                                                                                                                                                                                                                                                                                                        | 279147  |
| 19 | ((sugar or sucrose or fructose or glucose) adj2 (intake or consum*)).ti,ab.                                                                                                                                                                                                                                                                                                                                                                                                                                                                                                                                                                                                                                    | 2160    |
| 20 | diet*.ti,ab.                                                                                                                                                                                                                                                                                                                                                                                                                                                                                                                                                                                                                                                                                                   | 47688   |
| 21 | "sugary food*".ti,ab.                                                                                                                                                                                                                                                                                                                                                                                                                                                                                                                                                                                                                                                                                          | 62      |
| 22 | Sugars/                                                                                                                                                                                                                                                                                                                                                                                                                                                                                                                                                                                                                                                                                                        | 2537    |
| 23 | diets/                                                                                                                                                                                                                                                                                                                                                                                                                                                                                                                                                                                                                                                                                                         | 14955   |
| 24 | ((processed or acidic) adj1 food*).ti,ab.                                                                                                                                                                                                                                                                                                                                                                                                                                                                                                                                                                                                                                                                      | 396     |
| 25 | ((sugary or fizzy or carbonated or soft) adj1 drink*).ti,ab.                                                                                                                                                                                                                                                                                                                                                                                                                                                                                                                                                                                                                                                   | 961     |
| 26 | soda.ti,ab.                                                                                                                                                                                                                                                                                                                                                                                                                                                                                                                                                                                                                                                                                                    | 513     |
| 27 | or/19-26                                                                                                                                                                                                                                                                                                                                                                                                                                                                                                                                                                                                                                                                                                       | 53562   |
| 28 | (severe and multiple disadvantage*).ti,ab.                                                                                                                                                                                                                                                                                                                                                                                                                                                                                                                                                                                                                                                                     | 10      |
| 29 | Homeless/                                                                                                                                                                                                                                                                                                                                                                                                                                                                                                                                                                                                                                                                                                      | 8126    |
| 30 | homeless*.ti,ab.                                                                                                                                                                                                                                                                                                                                                                                                                                                                                                                                                                                                                                                                                               | 12396   |
| 31 | ((hous* or home* or accommodat* or shelter) adj3 (insecur* or instability or unstable or stability)).ti,ab.                                                                                                                                                                                                                                                                                                                                                                                                                                                                                                                                                                                                    | 2080    |
| 32 | or/28-31                                                                                                                                                                                                                                                                                                                                                                                                                                                                                                                                                                                                                                                                                                       | 14528   |
| 33 | (probationer* or parolee* or ((repeat* or ex or re or revolving door or habitual or multiple or former* or previously*) adj1 (offen* or convict* or prisoner* or imprison* or incarcerat* or criminal*)) or (former adj3 inmate*) or ((community or probation* or parole* or reintegrat*) adj4 (prison* or offender* or criminal* or convict* or inmate*)) or ((individuals or men or women) adj2 (probation or parole)) or ((reintegrate* or reent* or return*) adj3 community)).ti,ab.                                                                                                                                                                                                                       | 9014    |
| 34 | "criminal justice".ti,ab.                                                                                                                                                                                                                                                                                                                                                                                                                                                                                                                                                                                                                                                                                      | 13327   |
| 35 | or/33-34                                                                                                                                                                                                                                                                                                                                                                                                                                                                                                                                                                                                                                                                                                       | 21049   |
| 36 | ((program* or policy or policies or strateg* or scheme* or project* or initiative* or "care package" or training or educat* or pilot or guidance or guideline* or study or pathway or treatment* or promot* or management or "support group" or process* or trial* or intervention*) adj5 (evaluat* or effect* or measur* or assess* or experiment* or impact* or feasab* or acceptab* or efficacy or perception* or belief* or uptake or consequence* or attitud* or barrier* or facilit* or motivat* or experience* or implement* or adher* or retention or retain* or reduc* or increas* or improv* or outcome* or cost* or benefit* or interview* or qualitative or ethnograph* or "focus group*")).ti,ab. | 1427116 |

|    |                                 |         |
|----|---------------------------------|---------|
| 37 | "housing first".ti,ab.          | 354     |
| 38 | (outcome* adj5 evaluat*).ti,ab. | 15300   |
| 39 | or/36-38                        | 1431044 |
| 40 | (32 or 35) and (4 or 18 or 27)  | 8717    |
| 41 | 39 and 40                       | 4427    |

**CINAHL (via Ebsco) Friday, February 3, 2023 12:16:53 PM**

| #   | Query                                                                                                                                                                                                                                                                                                                                                                                                                                                                                                                                                                                                                                                                                                                                     | Results   |
|-----|-------------------------------------------------------------------------------------------------------------------------------------------------------------------------------------------------------------------------------------------------------------------------------------------------------------------------------------------------------------------------------------------------------------------------------------------------------------------------------------------------------------------------------------------------------------------------------------------------------------------------------------------------------------------------------------------------------------------------------------------|-----------|
| S44 | S41 AND S42 AND S43                                                                                                                                                                                                                                                                                                                                                                                                                                                                                                                                                                                                                                                                                                                       | 3,512     |
| S43 | S5 or S18 or S29                                                                                                                                                                                                                                                                                                                                                                                                                                                                                                                                                                                                                                                                                                                          | 551,298   |
| S42 | S34 or S37                                                                                                                                                                                                                                                                                                                                                                                                                                                                                                                                                                                                                                                                                                                                | 20,783    |
| S41 | S38 OR S39 OR S40                                                                                                                                                                                                                                                                                                                                                                                                                                                                                                                                                                                                                                                                                                                         | 1,823,817 |
| S40 | TI (outcome* N5 evaluat*) OR AB (outcome* N5 evaluat*)                                                                                                                                                                                                                                                                                                                                                                                                                                                                                                                                                                                                                                                                                    | 43,464    |
| S39 | TI "housing first" OR AB "housing first"                                                                                                                                                                                                                                                                                                                                                                                                                                                                                                                                                                                                                                                                                                  | 327       |
| S38 | TI ( ((program* or policy or policies or strateg* or scheme* or project* or initiative* or "care package" or training or educat* or pilot or guidance or guideline* or study or pathway or treatment* or promot* or management or "support group" or process* or trial* or intervention*) N5 (evaluat* or effect* or measur* or assess* or experiment* or impact* or feasab* or acceptab* or efficacy or perception* or belief* or uptake or consequence* or attitud* or barrier* or facilit* or motivat* or experience* or implement* or adher* or retention or retain* or reduc* or increas* or improv* or outcome* or cost* or benefit* or interview* or qualitative or ethnograph* or "focus group*")) ) OR AB ( ((program* or policy | 1,812,106 |

or policies or strateg\* or scheme\* or project\* or initiative\* or "care package" or training or educat\* or pilot or guidance or guideline\* or study or pathway or treatment\* or promot\* or management or "support group" or process\* or trial\* or intervention\*) N5 (evaluat\* or effect\* or measur\* or assess\* or experiment\* or impact\* or feasab\* or acceptab\* or efficacy or perception\* or belief\* or uptake or consequence\* or attitud\* or barrier\* or facilit\* or motivat\* or experience\* or implement\* or adher\* or retention or retain\* or reduc\* or increas\* or improv\* or outcome\* or cost\* or benefit\* or interview\* or qualitative or ethnograph\* or "focus group\*")) )

S37 S35 OR S36 6,735

S36 T1 "criminal justice" OR AB "criminal justice" 3,845

T1 ( (probationer\* or parolee\* or ((repeat\* or ex or re or revolving door or habitual or multiple or former\* or previously\*) N1 (offen\* or convict\* or prisoner\* or imprison\* or incarcerat\* or criminal\*)) or (former N3 inmate\*) or ((community or probation\* or parole\* or reintegrat\*) N4 (prison\* or offender\* or criminal\* or convict\* or inmate\*)) or ((individuals or men or women) N2 (probation or parole)) or ((reintegrate\* or reent\* or return\*) N3 community)) ) OR AB ( (probationer\* or parolee\* or ((repeat\* or ex or re or revolving door or habitual or multiple or former\* or previously\*) N1 (offen\* or convict\* or prisoner\* or imprison\* or incarcerat\* or criminal\*)) or (former N3 inmate\*) or ((community or probation\* or parole\* or reintegrat\*) N4 (prison\* or offender\* or criminal\* or convict\* or inmate\*)) or ((individuals or men or women) N2

S35 3,325



|    |     |                                               |         |
|----|-----|-----------------------------------------------|---------|
| 1  |     |                                               |         |
| 2  |     |                                               |         |
| 3  |     |                                               |         |
| 4  |     | (probation or parole)) or ((reintegrate*      |         |
| 5  |     | or reent* or return*) N3 community)) )        |         |
| 6  |     |                                               |         |
| 7  | S34 | S30 OR S31 OR S32 OR S33                      | 14,314  |
| 8  |     |                                               |         |
| 9  |     |                                               |         |
| 10 |     | TI ( ((hous* or home* or accommodat*          |         |
| 11 |     | or shelter) N3 (insecur* or instability or    |         |
| 12 |     | unstable or stability)) ) OR AB ( ((hous*     |         |
| 13 |     | or home* or accommodat* or shelter)           |         |
| 14 |     | N3 (insecur* or instability or unstable or    |         |
| 15 |     | stability)) )                                 |         |
| 16 | S33 |                                               | 2,684   |
| 17 |     |                                               |         |
| 18 | S32 | TI homeless* OR AB homeless*                  | 10,454  |
| 19 |     |                                               |         |
| 20 |     |                                               |         |
| 21 | S31 | (MH "Homeless Persons")                       | 6,580   |
| 22 |     |                                               |         |
| 23 |     |                                               |         |
| 24 |     | TI ( (severe and multiple disadvantage* )     |         |
| 25 |     | OR AB ( (severe and multiple                  |         |
| 26 | S30 | disadvantage* ) )                             | 22      |
| 27 |     |                                               |         |
| 28 |     |                                               |         |
| 29 |     | S19 OR S20 OR S21 OR S22 OR S23 OR            |         |
| 30 | S29 | S24 OR S25 OR S26 OR S27 OR S28               | 191,033 |
| 31 |     |                                               |         |
| 32 |     |                                               |         |
| 33 | S28 | TI soda OR AB soda                            | 1,512   |
| 34 |     |                                               |         |
| 35 | S27 | (MH "Sweetened Beverages")                    | 933     |
| 36 |     |                                               |         |
| 37 |     |                                               |         |
| 38 | S26 | (MH "Carbonated Beverages")                   | 2,794   |
| 39 |     |                                               |         |
| 40 |     |                                               |         |
| 41 |     | TI ( ((sugary or fizzy or carbonated or       |         |
| 42 |     | soft) N1 drink* ) ) OR AB ( ((sugary or fizzy |         |
| 43 | S25 | or carbonated or soft) N1 drink* ) )          | 2,558   |
| 44 |     |                                               |         |
| 45 |     |                                               |         |
| 46 |     | TI ( ((processed or acidic) N1 food* ) ) OR   |         |
| 47 | S24 | AB ( ((processed or acidic) N1 food* ) )      | 2,072   |
| 48 |     |                                               |         |
| 49 | S23 | (MH "Diet")                                   | 63,635  |
| 50 |     |                                               |         |
| 51 |     |                                               |         |
| 52 | S22 | (MH "Dietary Sucrose")                        | 5,119   |
| 53 |     |                                               |         |
| 54 |     |                                               |         |
| 55 | S21 | TI "sugary food*" OR AB "sugary food*"        | 193     |
| 56 |     |                                               |         |
| 57 | S20 | TI diet* OR AB diet*                          | 155,131 |
| 58 |     |                                               |         |
| 59 |     |                                               |         |
| 60 |     |                                               |         |

|    |     |                                                |         |
|----|-----|------------------------------------------------|---------|
| 1  |     |                                                |         |
| 2  |     |                                                |         |
| 3  |     |                                                |         |
| 4  |     | TI ( ((sugar or sucrose or fructose or         |         |
| 5  |     | glucose) N2 (intake or consum*)) ) OR AB       |         |
| 6  |     | ( ((sugar or sucrose or fructose or            |         |
| 7  | S19 | glucose) N2 (intake or consum*)) )             | 5,433   |
| 8  |     |                                                |         |
| 9  |     |                                                |         |
| 10 |     | S6 OR S7 OR S8 OR S9 OR S10 OR S11 OR          |         |
| 11 |     | S12 OR S13 OR S14 OR S15 OR S16 OR             |         |
| 12 | S18 | S17                                            | 326,783 |
| 13 |     |                                                |         |
| 14 |     |                                                |         |
| 15 |     | TI ( (drug N1 (habit or tak* or hard or        |         |
| 16 |     | illicit or inject*)) ) OR AB ( (drug N1        |         |
| 17 |     | (habit or tak* or hard or illicit or inject*)) |         |
| 18 | S17 | )                                              | 16,744  |
| 19 |     |                                                |         |
| 20 |     |                                                |         |
| 21 |     | TI ( ((alcohol or drug* or substance*) N2      |         |
| 22 |     | (misuse* or abuse* or use* or addict* or       |         |
| 23 |     | dependenc* or issue* or problem*)) ) OR        |         |
| 24 |     | AB ( ((alcohol or drug* or substance*) N2      |         |
| 25 |     | (misuse* or abuse* or use* or addict* or       |         |
| 26 |     | dependenc* or issue* or problem*)) )           |         |
| 27 | S16 |                                                | 132,015 |
| 28 |     |                                                |         |
| 29 |     |                                                |         |
| 30 | S15 | (MH "Behavior, Addictive")                     | 7,159   |
| 31 |     |                                                |         |
| 32 | S14 | (MH "Substance Abusers+")                      | 9,952   |
| 33 |     |                                                |         |
| 34 |     |                                                |         |
| 35 | S13 | (MH "Substance Use Disorders+")                | 182,899 |
| 36 |     |                                                |         |
| 37 |     |                                                |         |
| 38 | S12 | TI "street drink*" OR AB "street drink*"       | 6       |
| 39 |     |                                                |         |
| 40 |     |                                                |         |
| 41 |     | TI ( (alcoholic* N3 (person or people or       |         |
| 42 |     | adult or parent* or family)) ) OR AB (         |         |
| 43 |     | (alcoholic* N3 (person or people or adult      |         |
| 44 | S11 | or parent* or family)) )                       | 429     |
| 45 |     |                                                |         |
| 46 | S10 | (MH "Alcoholics")                              | 730     |
| 47 |     |                                                |         |
| 48 |     |                                                |         |
| 49 | S9  | (MH "Alcoholism")                              | 17,654  |
| 50 |     |                                                |         |
| 51 |     |                                                |         |
| 52 | S8  | (MH "Alcohol Drinking")                        | 33,696  |
| 53 |     |                                                |         |
| 54 |     | TI ( (smoking or cigarette* or tobacco) )      |         |
| 55 |     | OR AB ( (smoking or cigarette* or              |         |
| 56 | S7  | tobacco) )                                     | 114,101 |
| 57 |     |                                                |         |
| 58 |     |                                                |         |
| 59 |     |                                                |         |
| 60 |     |                                                |         |

|    |    |                                                                                                                                                                                                                |        |
|----|----|----------------------------------------------------------------------------------------------------------------------------------------------------------------------------------------------------------------|--------|
| 1  |    |                                                                                                                                                                                                                |        |
| 2  |    |                                                                                                                                                                                                                |        |
| 3  |    |                                                                                                                                                                                                                |        |
| 4  | S6 | (MH "Smoking")                                                                                                                                                                                                 | 65,404 |
| 5  |    |                                                                                                                                                                                                                |        |
| 6  | S5 | S1 OR S2 OR S3 OR S4                                                                                                                                                                                           | 51,836 |
| 7  |    |                                                                                                                                                                                                                |        |
| 8  |    |                                                                                                                                                                                                                |        |
| 9  |    |                                                                                                                                                                                                                |        |
| 10 |    |                                                                                                                                                                                                                |        |
| 11 |    |                                                                                                                                                                                                                |        |
| 12 |    |                                                                                                                                                                                                                |        |
| 13 |    |                                                                                                                                                                                                                |        |
| 14 | S4 | TI ( ((dental or oral or tooth or teeth or mouth) N3 (health or care or hygiene or rehabilitation)) ) OR AB ( ((dental or oral or tooth or teeth or mouth) N3 (health or care or hygiene or rehabilitation)) ) | 33,755 |
| 15 |    |                                                                                                                                                                                                                |        |
| 16 | S3 | (MH "Dental Health Services+")                                                                                                                                                                                 | 20,382 |
| 17 |    |                                                                                                                                                                                                                |        |
| 18 |    |                                                                                                                                                                                                                |        |
| 19 | S2 | (MH "Oral Health")                                                                                                                                                                                             | 14,782 |
| 20 |    |                                                                                                                                                                                                                |        |
| 21 |    |                                                                                                                                                                                                                |        |
| 22 | S1 | (MH "Oral Hygiene")                                                                                                                                                                                            | 6,534  |
| 23 |    |                                                                                                                                                                                                                |        |
| 24 |    |                                                                                                                                                                                                                |        |
| 25 |    |                                                                                                                                                                                                                |        |

**Scopus** – search run on 6<sup>th</sup> February 2023

### 2846 results

( TITLE-ABS-

KEY ( ( program\* OR policy OR policies OR strateg\* OR scheme\* OR project\* OR initiative\* OR "care package" OR training OR educat\* OR pilot OR guidance OR guideline\* OR study OR pathway OR treatment\* OR promot\* OR management OR "support group" OR process\* OR trial\* OR intervention\* ) W/5 ( evaluat\* OR effect\* OR measur\* OR assess\* OR experiment\* OR impact\* OR feasab\* OR acceptab\* OR efficacy OR perception\* OR belief\* OR uptake OR consequence\* OR attitud\* OR barrier\* OR facilit\* OR motivat\* OR experience\* OR implement\* OR adher\* OR retention OR retain\* OR reduc\* OR increas\* OR improv\* OR outcome\* OR cost\* OR benefit\* OR interview\* OR qualitative OR ethnograph\* OR "focus group\*" ) OR "housing first" OR ( outcome\* W/5 evaluat\* ) ) AND ( ( TITLE-ABS-KEY ( ( severe AND multiple AND disadvantage\* ) OR homeless\* OR ( ( hous\* OR home\* OR accommodat\* OR shelter ) W/3 ( insecur\* OR instability OR unstable OR stability ) ) ) OR ( ( TITLE-ABS-KEY ( probationer\* OR parolee\* OR "criminal justice" ) ) OR ( TITLE-ABS-KEY ( former W/3 inmate\* ) ) OR ( TITLE-ABS-KEY ( ( community OR probation\* OR parole\* OR reintegrat\* ) W/4 ( prison\* OR offender\* OR criminal\* OR convict\* OR inmate\* ) ) ) OR ( TITLE-ABS-KEY ( ( individuals OR men OR women ) W/2 ( probation OR parole ) ) ) OR ( TITLE-ABS-KEY ( ( reintegrate\* OR reent\* OR return\* ) W/3 community ) ) OR ( TITLE-ABS-KEY ( ( repeat\* OR ex OR re OR "revolving door" OR habitual OR multiple OR former\* OR previously\* ) W/1 ( offen\* OR convict\* OR prisoner\* OR imprison\* OR incarcerat\* OR criminal\* ) ) ) ) AND ( ( TITLE-ABS-KEY ( ( dental OR oral OR tooth OR teeth OR mouth ) W/3 ( health OR care OR hygiene OR rehabilitation ) ) ) OR ( TITLE-ABS-KEY ( smoking OR cigarette\* OR tobacco ) ) OR ( TITLE-ABS-KEY ( "alcohol drinking" OR alcoholism OR ( alcoholic\* W/3 ( person\* OR people OR adult OR parent\* OR family ) ) OR "street drink" ) ) OR ( TITLE-ABS-KEY ( ( alcohol OR drug\* OR substance\* ) W/2 ( misuse\* OR abuse\* OR use\* OR addict\* OR depende

1  
2  
3 nc\* OR issue\* OR problem OR disorder\* ) OR ( drug W/1 ( habit OR tak\* OR hard OR illicit OR inject\*  
4 ) ) ) OR ( TITLE-ABS-  
5 KEY ( ( sugar OR sucrose OR fructose OR glucose ) W/2 ( intake OR consum\* ) OR diet\* OR "sugary  
6 food\*" OR ( ( processed OR acidic ) W/1 food\* ) OR ( ( sugary OR fizzy OR carbonated OR soft OR swe  
7 etened ) W/1 ( drink\* OR beverage\* ) ) OR soda ) ) AND NOT INDEX ( medline ) )  
8  
9  
10  
11  
12  
13  
14  
15  
16  
17  
18  
19  
20  
21  
22  
23  
24  
25  
26  
27  
28  
29  
30  
31  
32  
33  
34  
35  
36  
37  
38  
39  
40  
41  
42  
43  
44  
45  
46  
47  
48  
49  
50  
51  
52  
53  
54  
55  
56  
57  
58  
59  
60

For peer review only

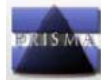

## PRISMA 2020 Checklist

| Section and Topic             | Item # | Checklist item                                                                                                                                                                                                                                                                                       | Location where item is reported |
|-------------------------------|--------|------------------------------------------------------------------------------------------------------------------------------------------------------------------------------------------------------------------------------------------------------------------------------------------------------|---------------------------------|
| <b>TITLE</b>                  |        |                                                                                                                                                                                                                                                                                                      |                                 |
| Title                         | 1      | Identify the report as a systematic review.                                                                                                                                                                                                                                                          | Lines 2-3                       |
| <b>ABSTRACT</b>               |        |                                                                                                                                                                                                                                                                                                      |                                 |
| Abstract                      | 2      | See the PRISMA 2020 for Abstracts checklist.                                                                                                                                                                                                                                                         | Page 1                          |
| <b>INTRODUCTION</b>           |        |                                                                                                                                                                                                                                                                                                      |                                 |
| Rationale                     | 3      | Describe the rationale for the review in the context of existing knowledge.                                                                                                                                                                                                                          | Lines 38 - 44                   |
| Objectives                    | 4      | Provide an explicit statement of the objective(s) or question(s) the review addresses.                                                                                                                                                                                                               | Lines 54- 56                    |
| <b>METHODS</b>                |        |                                                                                                                                                                                                                                                                                                      |                                 |
| Eligibility criteria          | 5      | Specify the inclusion and exclusion criteria for the review and how studies were grouped for the syntheses.                                                                                                                                                                                          | Table 1                         |
| Information sources           | 6      | Specify all databases, registers, websites, organisations, reference lists and other sources searched or consulted to identify studies. Specify the date when each source was last searched or consulted.                                                                                            | Lines 63- 68                    |
| Search strategy               | 7      | Present the full search strategies for all databases, registers and websites, including any filters and limits used.                                                                                                                                                                                 | Supplementary file              |
| Selection process             | 8      | Specify the methods used to decide whether a study met the inclusion criteria of the review, including how many reviewers screened each record and each report retrieved, whether they worked independently, and if applicable, details of automation tools used in the process.                     | Lines 70 -73                    |
| Data collection process       | 9      | Specify the methods used to collect data from reports, including how many reviewers collected data from each report, whether they worked independently, any processes for obtaining or confirming data from study investigators, and if applicable, details of automation tools used in the process. | Lines 85 - 91                   |
| Data items                    | 10a    | List and define all outcomes for which data were sought. Specify whether all results that were compatible with each outcome domain in each study were sought (e.g. for all measures, time points, analyses), and if not, the methods used to decide which results to collect.                        | Table 1                         |
|                               | 10b    | List and define all other variables for which data were sought (e.g. participant and intervention characteristics, funding sources). Describe any assumptions made about any missing or unclear information.                                                                                         | Table 1 and Table 2             |
| Study risk of bias assessment | 11     | Specify the methods used to assess risk of bias in the included studies, including details of the tool(s) used, how many reviewers assessed each study and whether they worked independently, and if applicable, details of automation tools used in the process.                                    | Lines 75 - 83                   |
| Effect measures               | 12     | Specify for each outcome the effect measure(s) (e.g. risk ratio, mean difference) used in the synthesis or presentation of results.                                                                                                                                                                  | Table 2                         |
| Synthesis methods             | 13a    | Describe the processes used to decide which studies were eligible for each synthesis (e.g. tabulating the study intervention characteristics and comparing against the planned groups for each synthesis (item #5)).                                                                                 | Table 1                         |
|                               | 13b    | Describe any methods required to prepare the data for presentation or synthesis, such as handling of missing summary statistics, or data conversions.                                                                                                                                                | Lines 85 -91                    |
|                               | 13c    | Describe any methods used to tabulate or visually display results of individual studies and syntheses.                                                                                                                                                                                               | Lines 85 -91                    |
|                               | 13d    | Describe any methods used to synthesize results and provide a rationale for the choice(s). If meta-analysis was performed, describe the model(s), method(s) to identify the presence and extent of statistical heterogeneity, and software package(s) used.                                          | Lines 85 -91                    |
|                               | 13e    | Describe any methods used to explore possible causes of heterogeneity among study results (e.g. subgroup analysis, meta-regression).                                                                                                                                                                 | N/A                             |
|                               | 13f    | Describe any sensitivity analyses conducted to assess robustness of the synthesized results.                                                                                                                                                                                                         | N/A                             |
| Reporting bias assessment     | 14     | Describe any methods used to assess risk of bias due to missing results in a synthesis (arising from reporting biases).                                                                                                                                                                              | Lines 75 - 83                   |
| Certainty                     | 15     | Describe any methods used to assess certainty (or confidence) in the body of evidence for an outcome.                                                                                                                                                                                                | Lines 75 - 83                   |



## PRISMA 2020 Checklist

| Section and Topic              | Item # | Checklist item                                                                                                                                                                                                                                                                       | Location where item is reported |
|--------------------------------|--------|--------------------------------------------------------------------------------------------------------------------------------------------------------------------------------------------------------------------------------------------------------------------------------------|---------------------------------|
| assessment                     |        |                                                                                                                                                                                                                                                                                      |                                 |
| <b>RESULTS</b>                 |        |                                                                                                                                                                                                                                                                                      |                                 |
| Study selection                | 16a    | Describe the results of the search and selection process, from the number of records identified in the search to the number of studies included in the review, ideally using a flow diagram.                                                                                         | Figure 1                        |
|                                | 16b    | Cite studies that might appear to meet the inclusion criteria, but which were excluded, and explain why they were excluded.                                                                                                                                                          | Figure 1                        |
| Study characteristics          | 17     | Cite each included study and present its characteristics.                                                                                                                                                                                                                            | Table 2                         |
| Risk of bias in studies        | 18     | Present assessments of risk of bias for each included study.                                                                                                                                                                                                                         | Table 2                         |
| Results of individual studies  | 19     | For all outcomes, present, for each study: (a) summary statistics for each group (where appropriate) and (b) an effect estimate and its precision (e.g. confidence/credible interval), ideally using structured tables or plots.                                                     | Table 1                         |
| Results of syntheses           | 20a    | For each synthesis, briefly summarise the characteristics and risk of bias among contributing studies.                                                                                                                                                                               | Lines 102 -108                  |
|                                | 20b    | Present results of all statistical syntheses conducted. If meta-analysis was done, present for each the summary estimate and its precision (e.g. confidence/credible interval) and measures of statistical heterogeneity. If comparing groups, describe the direction of the effect. | N/A                             |
|                                | 20c    | Present results of all investigations of possible causes of heterogeneity among study results.                                                                                                                                                                                       | N/A                             |
|                                | 20d    | Present results of all sensitivity analyses conducted to assess the robustness of the synthesized results.                                                                                                                                                                           | N/A                             |
| Reporting biases               | 21     | Present assessments of risk of bias due to missing results (arising from reporting biases) for each synthesis assessed.                                                                                                                                                              | Lines 103 - 108                 |
| Certainty of evidence          | 22     | Present assessments of certainty (or confidence) in the body of evidence for each outcome assessed.                                                                                                                                                                                  | N/A                             |
| <b>DISCUSSION</b>              |        |                                                                                                                                                                                                                                                                                      |                                 |
| Discussion                     | 23a    | Provide a general interpretation of the results in the context of other evidence.                                                                                                                                                                                                    | Lines 223 -251                  |
|                                | 23b    | Discuss any limitations of the evidence included in the review.                                                                                                                                                                                                                      | Lines 274 - 277                 |
|                                | 23c    | Discuss any limitations of the review processes used.                                                                                                                                                                                                                                | Lines 277 -278                  |
|                                | 23d    | Discuss implications of the results for practice, policy, and future research.                                                                                                                                                                                                       | Lines 281 -288                  |
| <b>OTHER INFORMATION</b>       |        |                                                                                                                                                                                                                                                                                      |                                 |
| Registration and protocol      | 24a    | Provide registration information for the review, including register name and registration number, or state that the review was not registered.                                                                                                                                       | Lines 58 -59                    |
|                                | 24b    | Indicate where the review protocol can be accessed, or state that a protocol was not prepared.                                                                                                                                                                                       | Lines 58 -59                    |
|                                | 24c    | Describe and explain any amendments to information provided at registration or in the protocol.                                                                                                                                                                                      |                                 |
| Support                        | 25     | Describe sources of financial or non-financial support for the review, and the role of the funders or sponsors in the review.                                                                                                                                                        | Lines 295 - 300                 |
| Competing interests            | 26     | Declare any competing interests of review authors.                                                                                                                                                                                                                                   | Lines 302-304                   |
| Availability of data, code and | 27     | Report which of the following are publicly available and where they can be found: template data collection forms; data extracted from included studies; data used for all analyses; analytic code; any other materials used in the review                                            | N/A                             |



# PRISMA 2020 Checklist

1  
2  
3  
4  
5  
6  
7  
8  
9  
10  
11  
12  
13  
14  
15  
16  
17  
18  
19  
20  
21  
22  
23  
24  
25  
26  
27  
28  
29  
30  
31  
32  
33  
34  
35  
36  
37  
38  
39  
40  
41  
42  
43  
44  
45  
46  
47

| Section and Topic | Item # | Checklist item | Location where item is reported |
|-------------------|--------|----------------|---------------------------------|
| other materials   |        |                |                                 |

From: Page MJ, McKenzie JE, Bossuyt PM, Boutron I, Hoffmann TC, Mulrow CD, et al. The PRISMA 2020 statement: an updated guideline for reporting systematic reviews. *BMJ* 2021;372:n71. doi: 10.1136/bmj.n71

For more information, visit: <http://www.prisma-statement.org/>

For peer review only
