# Supplementary material for: Factors influencing implementation and sustainability of interventions to improve oral health and related health behaviours in adults experiencing severe and multiple disadvantage: a mixed-methods systematic review
Source: PubMed Central journal article supplement (PMC10806606; doi:10.1136/bmjopen-2023-080160), 2024-01-12
Supplement: bmjopen-2023-080160supp001.pdf [file bmjopen-2023-080160supp001.pdf]

## SMD Project – Search updates February 2023

Database(s): **Ovid MEDLINE(R) and Epub Ahead of Print, In-Process, In-Data-Review & Other Non-Indexed Citations, Daily and Versions** 1946 to January 30<sup>th</sup> 2023 (Search run 3<sup>rd</sup> February 2023)

Search Strategy:

| #  | Searches                                                                                                                     | Results |
|----|------------------------------------------------------------------------------------------------------------------------------|---------|
| 1  | Oral Hygiene/                                                                                                                | 13719   |
| 2  | Mouth Rehabilitation/                                                                                                        | 1470    |
| 3  | Oral Health/                                                                                                                 | 19795   |
| 4  | exp Dental Health Services/                                                                                                  | 39658   |
| 5  | ((dental or oral or tooth or teeth or mouth) adj3 (health or care or hygiene or rehabilitation)).ti,ab,kw.                   | 71845   |
| 6  | or/1-5                                                                                                                       | 105093  |
| 7  | Smoking/                                                                                                                     | 147692  |
| 8  | (smoking or cigarette* or tobacco).ti,ab,kw.                                                                                 | 346981  |
| 9  | exp "Tobacco Use"/                                                                                                           | 9080    |
| 10 | Alcohol Drinking/                                                                                                            | 74302   |
| 11 | Alcoholism/                                                                                                                  | 79526   |
| 12 | Alcoholics/                                                                                                                  | 871     |
| 13 | (alcoholic* adj3 (person or people or adult or parent* or family)).ti,ab,kw.                                                 | 947     |
| 14 | "street drink*".ti,ab,kw.                                                                                                    | 8       |
| 15 | exp Substance-Related Disorders/                                                                                             | 306459  |
| 16 | exp Drug users/                                                                                                              | 3922    |
| 17 | Behavior, Addictive/                                                                                                         | 12185   |
| 18 | ((alcohol or drug* or substance*) adj2 (misuse* or abuse* or use* or addict* or dependenc* or issue* or problem*)).ti,ab,kw. | 314183  |
| 19 | (drug adj1 (habit or tak* or hard or illicit or inject*)).ti,ab,kw.                                                          | 25327   |
| 20 | or/7-19                                                                                                                      | 873304  |
| 21 | ((sugar or sucrose or fructose or glucose) adj2 (intake or consum*)).ti,ab,kw.                                               | 16517   |

|    |                                                                                                                                                                                                                                                                                                                                                                                                                                                                                                                                                                                                                                                                                                                   |         |
|----|-------------------------------------------------------------------------------------------------------------------------------------------------------------------------------------------------------------------------------------------------------------------------------------------------------------------------------------------------------------------------------------------------------------------------------------------------------------------------------------------------------------------------------------------------------------------------------------------------------------------------------------------------------------------------------------------------------------------|---------|
| 22 | diet*.ti,ab,kw.                                                                                                                                                                                                                                                                                                                                                                                                                                                                                                                                                                                                                                                                                                   | 665093  |
| 23 | "sugary food*".ti,ab,kw.                                                                                                                                                                                                                                                                                                                                                                                                                                                                                                                                                                                                                                                                                          | 328     |
| 24 | exp Dietary Sugars/ or Diet/                                                                                                                                                                                                                                                                                                                                                                                                                                                                                                                                                                                                                                                                                      | 186792  |
| 25 | ((processed or acidic) adj1 food*).ti,ab,kw.                                                                                                                                                                                                                                                                                                                                                                                                                                                                                                                                                                                                                                                                      | 5331    |
| 26 | ((sugary or fizzy or carbonated or soft) adj1 drink*).ti,ab,kw.                                                                                                                                                                                                                                                                                                                                                                                                                                                                                                                                                                                                                                                   | 5449    |
| 27 | carbonated beverages/ or sugar-sweetened beverages/                                                                                                                                                                                                                                                                                                                                                                                                                                                                                                                                                                                                                                                               | 3952    |
| 28 | soda.ti,ab,kw.                                                                                                                                                                                                                                                                                                                                                                                                                                                                                                                                                                                                                                                                                                    | 4878    |
| 29 | or/21-28                                                                                                                                                                                                                                                                                                                                                                                                                                                                                                                                                                                                                                                                                                          | 738771  |
| 30 | (severe and multiple disadvantage*).ti,ab,kw.                                                                                                                                                                                                                                                                                                                                                                                                                                                                                                                                                                                                                                                                     | 11      |
| 31 | Homeless Persons/                                                                                                                                                                                                                                                                                                                                                                                                                                                                                                                                                                                                                                                                                                 | 9442    |
| 32 | homeless*.ti,ab,kw.                                                                                                                                                                                                                                                                                                                                                                                                                                                                                                                                                                                                                                                                                               | 13348   |
| 33 | ((hous* or home* or accommodat* or shelter) adj3 (insecur* or instability or unstable or stability)).ti,ab,kw.                                                                                                                                                                                                                                                                                                                                                                                                                                                                                                                                                                                                    | 4473    |
| 34 | or/30-33                                                                                                                                                                                                                                                                                                                                                                                                                                                                                                                                                                                                                                                                                                          | 18951   |
| 35 | (probationer* or parolee* or ((repeat* or ex or re or revolving door or habitual or multiple or former* or previously*) adj1 (offen* or convict* or prisoner* or imprison* or incarcerat* or criminal*)) or (former adj3 inmate*) or ((community or probation* or parole* or reintegrat*) adj4 (prison* or offender* or criminal* or convict* or inmate*)) or ((individuals or men or women) adj2 (probation or parole)) or ((reintegrate* or reent* or return*) adj3 community)).ti,ab,kw.                                                                                                                                                                                                                       | 4639    |
| 36 | "criminal justice".ti,ab,kw.                                                                                                                                                                                                                                                                                                                                                                                                                                                                                                                                                                                                                                                                                      | 5400    |
| 37 | or/35-36                                                                                                                                                                                                                                                                                                                                                                                                                                                                                                                                                                                                                                                                                                          | 9464    |
| 38 | ((program* or policy or policies or strateg* or scheme* or project* or initiative* or "care package" or training or educat* or pilot or guidance or guideline* or study or pathway or treatment* or promot* or management or "support group" or process* or trial* or intervention*) adj5 (evaluat* or effect* or measur* or assess* or experiment* or impact* or feasab* or acceptab* or efficacy or perception* or belief* or uptake or consequence* or attitud* or barrier* or facilit* or motivat* or experience* or implement* or adher* or retention or retain* or reduc* or increas* or improv* or outcome* or cost* or benefit* or interview* or qualitative or ethnograph* or "focus group*")).ti,ab,kw. | 5409160 |
| 39 | "housing first".ti,ab,kw.                                                                                                                                                                                                                                                                                                                                                                                                                                                                                                                                                                                                                                                                                         | 388     |
| 40 | (outcome* adj5 evaluat*).ti,ab,kw.                                                                                                                                                                                                                                                                                                                                                                                                                                                                                                                                                                                                                                                                                | 106574  |

|    |                                |         |
|----|--------------------------------|---------|
| 41 | or/38-40                       | 5450432 |
| 42 | (34 or 37) and (6 or 20 or 29) | 10263   |
| 43 | 41 and 42                      | 5069    |

Database(s): **Embase** 1974 to 2023 January 30 (**Search run 3<sup>rd</sup> January 2023**)

Search Strategy:

| #  | Searches                                                                                                                     | Results |
|----|------------------------------------------------------------------------------------------------------------------------------|---------|
| 1  | mouth hygiene/                                                                                                               | 30848   |
| 2  | full mouth rehabilitation/                                                                                                   | 367     |
| 3  | dental health/                                                                                                               | 4854    |
| 4  | dental procedure/                                                                                                            | 30979   |
| 5  | dental practice/ or dental prevention/ or exp dental restoration/                                                            | 69380   |
| 6  | ((dental or oral or tooth or teeth or mouth) adj3 (health or care or hygiene or rehabilitation)).ti,ab,kw.                   | 74077   |
| 7  | or/1-6                                                                                                                       | 169561  |
| 8  | smoking/                                                                                                                     | 360231  |
| 9  | (smoking or cigarette* or tobacco).ti,ab,kw.                                                                                 | 482602  |
| 10 | "tobacco use"/                                                                                                               | 16485   |
| 11 | drinking behavior/                                                                                                           | 54555   |
| 12 | alcoholism/                                                                                                                  | 128949  |
| 13 | (alcoholic* adj3 (person or people or adult or parent* or family)).ti,ab,kw.                                                 | 1320    |
| 14 | "street drink*".ti,ab,kw.                                                                                                    | 15      |
| 15 | exp drug dependence/                                                                                                         | 266514  |
| 16 | addiction/                                                                                                                   | 50440   |
| 17 | ((alcohol or drug* or substance*) adj2 (misuse* or abuse* or use* or addict* or dependenc* or issue* or problem*)).ti,ab,kw. | 438421  |
| 18 | (drug adj1 (habit or tak* or hard or illicit or inject*)).ti,ab,kw.                                                          | 33544   |
| 19 | or/8-18                                                                                                                      | 1177022 |

|    |                                                                                                                                                                                                                                                                                                                                                                                                                                                                                                                                                                                                                                                                                                                   |         |
|----|-------------------------------------------------------------------------------------------------------------------------------------------------------------------------------------------------------------------------------------------------------------------------------------------------------------------------------------------------------------------------------------------------------------------------------------------------------------------------------------------------------------------------------------------------------------------------------------------------------------------------------------------------------------------------------------------------------------------|---------|
| 20 | ((sugar or sucrose or fructose or glucose) adj2 (intake or consum*)).ti,ab,kw.                                                                                                                                                                                                                                                                                                                                                                                                                                                                                                                                                                                                                                    | 21137   |
| 21 | diet*.ti,ab,kw.                                                                                                                                                                                                                                                                                                                                                                                                                                                                                                                                                                                                                                                                                                   | 830039  |
| 22 | "sugary food*".ti,ab,kw.                                                                                                                                                                                                                                                                                                                                                                                                                                                                                                                                                                                                                                                                                          | 432     |
| 23 | sugar intake/                                                                                                                                                                                                                                                                                                                                                                                                                                                                                                                                                                                                                                                                                                     | 9669    |
| 24 | diet/                                                                                                                                                                                                                                                                                                                                                                                                                                                                                                                                                                                                                                                                                                             | 244115  |
| 25 | ((processed or acidic) adj1 food*).ti,ab,kw.                                                                                                                                                                                                                                                                                                                                                                                                                                                                                                                                                                                                                                                                      | 6402    |
| 26 | ((sugary or fizzy or carbonated or soft) adj1 drink*).ti,ab,kw.                                                                                                                                                                                                                                                                                                                                                                                                                                                                                                                                                                                                                                                   | 7130    |
| 27 | carbonated beverage/                                                                                                                                                                                                                                                                                                                                                                                                                                                                                                                                                                                                                                                                                              | 3672    |
| 28 | sugar-sweetened beverage/                                                                                                                                                                                                                                                                                                                                                                                                                                                                                                                                                                                                                                                                                         | 2782    |
| 29 | or/20-28                                                                                                                                                                                                                                                                                                                                                                                                                                                                                                                                                                                                                                                                                                          | 902120  |
| 30 | (severe and multiple disadvantage*).ti,ab,kw.                                                                                                                                                                                                                                                                                                                                                                                                                                                                                                                                                                                                                                                                     | 14      |
| 31 | exp homeless person/                                                                                                                                                                                                                                                                                                                                                                                                                                                                                                                                                                                                                                                                                              | 3638    |
| 32 | homeless*.ti,ab,kw.                                                                                                                                                                                                                                                                                                                                                                                                                                                                                                                                                                                                                                                                                               | 16533   |
| 33 | ((hous* or home* or accommodat* or shelter) adj3 (insecur* or instability or unstable or stability)).ti,ab,kw.                                                                                                                                                                                                                                                                                                                                                                                                                                                                                                                                                                                                    | 5665    |
| 34 | or/30-33                                                                                                                                                                                                                                                                                                                                                                                                                                                                                                                                                                                                                                                                                                          | 21932   |
| 35 | (probationer* or parolee* or ((repeat* or ex or re or revolving door or habitual or multiple or former* or previously*) adj1 (offen* or convict* or prisoner* or imprison* or incarcerat* or criminal*)) or (former adj3 inmate*) or ((community or probation* or parole* or reintegrat*) adj4 (prison* or offender* or criminal* or convict* or inmate*)) or ((individuals or men or women) adj2 (probation or parole)) or ((reintegrate* or reent* or return*) adj3 community)).ti,ab,kw.                                                                                                                                                                                                                       | 5563    |
| 36 | "criminal justice".ti,ab,kw.                                                                                                                                                                                                                                                                                                                                                                                                                                                                                                                                                                                                                                                                                      | 6462    |
| 37 | or/35-36                                                                                                                                                                                                                                                                                                                                                                                                                                                                                                                                                                                                                                                                                                          | 11379   |
| 38 | ((program* or policy or policies or strateg* or scheme* or project* or initiative* or "care package" or training or educat* or pilot or guidance or guideline* or study or pathway or treatment* or promot* or management or "support group" or process* or trial* or intervention*) adj5 (evaluat* or effect* or measur* or assess* or experiment* or impact* or feasab* or acceptab* or efficacy or perception* or belief* or uptake or consequence* or attitud* or barrier* or facilit* or motivat* or experience* or implement* or adher* or retention or retain* or reduc* or increas* or improv* or outcome* or cost* or benefit* or interview* or qualitative or ethnograph* or "focus group*")).ti,ab,kw. | 7390414 |

|    |                                    |         |
|----|------------------------------------|---------|
| 39 | "housing first".ti,ab,kw.          | 444     |
| 40 | (outcome* adj5 evaluat*).ti,ab,kw. | 168129  |
| 41 | or/38-40                           | 7453916 |
| 42 | (34 or 37) and (7 or 19 or 29)     | 12372   |
| 43 | 41 and 42                          | 6384    |

Database(s): **APA PsycInfo** 1806 to January Week 4 2023 (Search run 3<sup>rd</sup> February 2023)

Search Strategy:

| #  | Searches                                                                                                                  | Results |
|----|---------------------------------------------------------------------------------------------------------------------------|---------|
| 1  | exp oral health/                                                                                                          | 1890    |
| 2  | exp dental health/                                                                                                        | 594     |
| 3  | ((dental or oral or tooth or teeth or mouth) adj3 (health or care or hygiene or rehabilitation)).ti,ab.                   | 3199    |
| 4  | or/1-3                                                                                                                    | 3613    |
| 5  | tobacco smoking/                                                                                                          | 35146   |
| 6  | (smoking or cigarette* or tobacco).ti,ab.                                                                                 | 69114   |
| 7  | alcohol drinking patterns/                                                                                                | 26122   |
| 8  | Alcoholism/                                                                                                               | 30862   |
| 9  | alcohol abuse/                                                                                                            | 19136   |
| 10 | (alcoholic* adj3 (person or people or adult or parent* or family)).ti,ab.                                                 | 1753    |
| 11 | "street drink*".ti,ab.                                                                                                    | 19      |
| 12 | "substance use disorder"/                                                                                                 | 10378   |
| 13 | drug abuse/                                                                                                               | 49214   |
| 14 | drug addiction/                                                                                                           | 11973   |
| 15 | addiction/                                                                                                                | 12827   |
| 16 | ((alcohol or drug* or substance*) adj2 (misuse* or abuse* or use* or addict* or dependenc* or issue* or problem*)).ti,ab. | 183254  |
| 17 | (drug adj1 (habit or tak* or hard or illicit or inject*)).ti,ab.                                                          | 12930   |

|    |                                                                                                                                                                                                                                                                                                                                                                                                                                                                                                                                                                                                                                                                                                                |         |
|----|----------------------------------------------------------------------------------------------------------------------------------------------------------------------------------------------------------------------------------------------------------------------------------------------------------------------------------------------------------------------------------------------------------------------------------------------------------------------------------------------------------------------------------------------------------------------------------------------------------------------------------------------------------------------------------------------------------------|---------|
| 18 | or/5-17                                                                                                                                                                                                                                                                                                                                                                                                                                                                                                                                                                                                                                                                                                        | 279147  |
| 19 | ((sugar or sucrose or fructose or glucose) adj2 (intake or consum*)).ti,ab.                                                                                                                                                                                                                                                                                                                                                                                                                                                                                                                                                                                                                                    | 2160    |
| 20 | diet*.ti,ab.                                                                                                                                                                                                                                                                                                                                                                                                                                                                                                                                                                                                                                                                                                   | 47688   |
| 21 | "sugary food*".ti,ab.                                                                                                                                                                                                                                                                                                                                                                                                                                                                                                                                                                                                                                                                                          | 62      |
| 22 | Sugars/                                                                                                                                                                                                                                                                                                                                                                                                                                                                                                                                                                                                                                                                                                        | 2537    |
| 23 | diets/                                                                                                                                                                                                                                                                                                                                                                                                                                                                                                                                                                                                                                                                                                         | 14955   |
| 24 | ((processed or acidic) adj1 food*).ti,ab.                                                                                                                                                                                                                                                                                                                                                                                                                                                                                                                                                                                                                                                                      | 396     |
| 25 | ((sugary or fizzy or carbonated or soft) adj1 drink*).ti,ab.                                                                                                                                                                                                                                                                                                                                                                                                                                                                                                                                                                                                                                                   | 961     |
| 26 | soda.ti,ab.                                                                                                                                                                                                                                                                                                                                                                                                                                                                                                                                                                                                                                                                                                    | 513     |
| 27 | or/19-26                                                                                                                                                                                                                                                                                                                                                                                                                                                                                                                                                                                                                                                                                                       | 53562   |
| 28 | (severe and multiple disadvantage*).ti,ab.                                                                                                                                                                                                                                                                                                                                                                                                                                                                                                                                                                                                                                                                     | 10      |
| 29 | Homeless/                                                                                                                                                                                                                                                                                                                                                                                                                                                                                                                                                                                                                                                                                                      | 8126    |
| 30 | homeless*.ti,ab.                                                                                                                                                                                                                                                                                                                                                                                                                                                                                                                                                                                                                                                                                               | 12396   |
| 31 | ((hous* or home* or accommodat* or shelter) adj3 (insecur* or instability or unstable or stability)).ti,ab.                                                                                                                                                                                                                                                                                                                                                                                                                                                                                                                                                                                                    | 2080    |
| 32 | or/28-31                                                                                                                                                                                                                                                                                                                                                                                                                                                                                                                                                                                                                                                                                                       | 14528   |
| 33 | (probationer* or parolee* or ((repeat* or ex or re or revolving door or habitual or multiple or former* or previously*) adj1 (offen* or convict* or prisoner* or imprison* or incarcerat* or criminal*)) or (former adj3 inmate*) or ((community or probation* or parole* or reintegrat*) adj4 (prison* or offender* or criminal* or convict* or inmate*)) or ((individuals or men or women) adj2 (probation or parole)) or ((reintegrate* or reent* or return*) adj3 community)).ti,ab.                                                                                                                                                                                                                       | 9014    |
| 34 | "criminal justice".ti,ab.                                                                                                                                                                                                                                                                                                                                                                                                                                                                                                                                                                                                                                                                                      | 13327   |
| 35 | or/33-34                                                                                                                                                                                                                                                                                                                                                                                                                                                                                                                                                                                                                                                                                                       | 21049   |
| 36 | ((program* or policy or policies or strateg* or scheme* or project* or initiative* or "care package" or training or educat* or pilot or guidance or guideline* or study or pathway or treatment* or promot* or management or "support group" or process* or trial* or intervention*) adj5 (evaluat* or effect* or measur* or assess* or experiment* or impact* or feasab* or acceptab* or efficacy or perception* or belief* or uptake or consequence* or attitud* or barrier* or facilit* or motivat* or experience* or implement* or adher* or retention or retain* or reduc* or increas* or improv* or outcome* or cost* or benefit* or interview* or qualitative or ethnograph* or "focus group*")).ti,ab. | 1427116 |

|    |                                 |         |
|----|---------------------------------|---------|
| 37 | "housing first".ti,ab.          | 354     |
| 38 | (outcome* adj5 evaluat*).ti,ab. | 15300   |
| 39 | or/36-38                        | 1431044 |
| 40 | (32 or 35) and (4 or 18 or 27)  | 8717    |
| 41 | 39 and 40                       | 4427    |

## CINAHL (via Ebsco) Friday, February 3, 2023 12:16:53 PM

| #   | Query                                                                                                                                                                                                                                                                                                                                                                                                                                                                                                                                                                                                                                                                                                                                     | Results   |
|-----|-------------------------------------------------------------------------------------------------------------------------------------------------------------------------------------------------------------------------------------------------------------------------------------------------------------------------------------------------------------------------------------------------------------------------------------------------------------------------------------------------------------------------------------------------------------------------------------------------------------------------------------------------------------------------------------------------------------------------------------------|-----------|
| S44 | S41 AND S42 AND S43                                                                                                                                                                                                                                                                                                                                                                                                                                                                                                                                                                                                                                                                                                                       | 3,512     |
| S43 | S5 or S18 or S29                                                                                                                                                                                                                                                                                                                                                                                                                                                                                                                                                                                                                                                                                                                          | 551,298   |
| S42 | S34 or S37                                                                                                                                                                                                                                                                                                                                                                                                                                                                                                                                                                                                                                                                                                                                | 20,783    |
| S41 | S38 OR S39 OR S40                                                                                                                                                                                                                                                                                                                                                                                                                                                                                                                                                                                                                                                                                                                         | 1,823,817 |
| S40 | TI (outcome* N5 evaluat*) OR AB (outcome* N5 evaluat*)                                                                                                                                                                                                                                                                                                                                                                                                                                                                                                                                                                                                                                                                                    | 43,464    |
| S39 | TI "housing first" OR AB "housing first"                                                                                                                                                                                                                                                                                                                                                                                                                                                                                                                                                                                                                                                                                                  | 327       |
| S38 | TI ( ((program* or policy or policies or strateg* or scheme* or project* or initiative* or "care package" or training or educat* or pilot or guidance or guideline* or study or pathway or treatment* or promot* or management or "support group" or process* or trial* or intervention*) N5 (evaluat* or effect* or measur* or assess* or experiment* or impact* or feasab* or acceptab* or efficacy or perception* or belief* or uptake or consequence* or attitud* or barrier* or facilit* or motivat* or experience* or implement* or adher* or retention or retain* or reduc* or increas* or improv* or outcome* or cost* or benefit* or interview* or qualitative or ethnograph* or "focus group*")) ) OR AB ( ((program* or policy | 1,812,106 |

|     |                                                                                                                                                                                                                                                                                                                                                                                                                                                                                                                                                                                                                                                                                                                                                                                                                                                                                  |       |
|-----|----------------------------------------------------------------------------------------------------------------------------------------------------------------------------------------------------------------------------------------------------------------------------------------------------------------------------------------------------------------------------------------------------------------------------------------------------------------------------------------------------------------------------------------------------------------------------------------------------------------------------------------------------------------------------------------------------------------------------------------------------------------------------------------------------------------------------------------------------------------------------------|-------|
|     | or policies or strateg* or scheme* or project* or initiative* or "care package" or training or educat* or pilot or guidance or guideline* or study or pathway or treatment* or promot* or management or "support group" or process* or trial* or intervention*) N5 (evaluat* or effect* or measur* or assess* or experiment* or impact* or feasab* or acceptab* or efficacy or perception* or belief* or uptake or consequence* or attitud* or barrier* or facilit* or motivat* or experience* or implement* or adher* or retention or retain* or reduc* or increas* or improv* or outcome* or cost* or benefit* or interview* or qualitative or ethnograph* or "focus group*")) )                                                                                                                                                                                               |       |
| S37 | S35 OR S36                                                                                                                                                                                                                                                                                                                                                                                                                                                                                                                                                                                                                                                                                                                                                                                                                                                                       | 6,735 |
| S36 | TI "criminal justice" OR AB "criminal justice"                                                                                                                                                                                                                                                                                                                                                                                                                                                                                                                                                                                                                                                                                                                                                                                                                                   | 3,845 |
| S35 | TI ( (probationer* or parolee* or ((repeat* or ex or re or revolving door or habitual or multiple or former* or previously*) N1 (offen* or convict* or prisoner* or imprison* or incarcerat* or criminal*)) or (former N3 inmate*) or ((community or probation* or parole* or reintegrat*) N4 (prison* or offender* or criminal* or convict* or inmate*)) or ((individuals or men or women) N2 (probation or parole)) or ((reintegrate* or reent* or return*) N3 community)) ) OR AB ( (probationer* or parolee* or ((repeat* or ex or re or revolving door or habitual or multiple or former* or previously*) N1 (offen* or convict* or prisoner* or imprison* or incarcerat* or criminal*)) or (former N3 inmate*) or ((community or probation* or parole* or reintegrat*) N4 (prison* or offender* or criminal* or convict* or inmate*)) or ((individuals or men or women) N2 | 3,325 |



|     |                                                                                                                                                                                                                          |         |
|-----|--------------------------------------------------------------------------------------------------------------------------------------------------------------------------------------------------------------------------|---------|
|     | (probation or parole) or ((reintegrate* or reent* or return*) N3 community)) )                                                                                                                                           |         |
| S34 | S30 OR S31 OR S32 OR S33                                                                                                                                                                                                 | 14,314  |
| S33 | TI ( ((hous* or home* or accommodat* or shelter) N3 (insecur* or instability or unstable or stability)) ) OR AB ( ((hous* or home* or accommodat* or shelter) N3 (insecur* or instability or unstable or stability)) ) ) | 2,684   |
| S32 | TI homeless* OR AB homeless*                                                                                                                                                                                             | 10,454  |
| S31 | (MH "Homeless Persons")                                                                                                                                                                                                  | 6,580   |
| S30 | TI ( (severe and multiple disadvantage* ) OR AB ( (severe and multiple disadvantage* ) ) )                                                                                                                               | 22      |
| S29 | S19 OR S20 OR S21 OR S22 OR S23 OR S24 OR S25 OR S26 OR S27 OR S28                                                                                                                                                       | 191,033 |
| S28 | TI soda OR AB soda                                                                                                                                                                                                       | 1,512   |
| S27 | (MH "Sweetened Beverages")                                                                                                                                                                                               | 933     |
| S26 | (MH "Carbonated Beverages")                                                                                                                                                                                              | 2,794   |
| S25 | TI ( ((sugary or fizzy or carbonated or soft) N1 drink* ) ) OR AB ( ((sugary or fizzy or carbonated or soft) N1 drink* ) )                                                                                               | 2,558   |
| S24 | TI ( ((processed or acidic) N1 food* ) ) OR AB ( ((processed or acidic) N1 food* ) )                                                                                                                                     | 2,072   |
| S23 | (MH "Diet")                                                                                                                                                                                                              | 63,635  |
| S22 | (MH "Dietary Sucrose")                                                                                                                                                                                                   | 5,119   |
| S21 | TI "sugary food*" OR AB "sugary food*"                                                                                                                                                                                   | 193     |
| S20 | TI diet* OR AB diet*                                                                                                                                                                                                     | 155,131 |

|     |                                                                                                                                                                                                                                                    |         |
|-----|----------------------------------------------------------------------------------------------------------------------------------------------------------------------------------------------------------------------------------------------------|---------|
| S19 | TI ( ((sugar or sucrose or fructose or glucose) N2 (intake or consum*)) ) OR AB ( ((sugar or sucrose or fructose or glucose) N2 (intake or consum*)) )                                                                                             | 5,433   |
| S18 | S6 OR S7 OR S8 OR S9 OR S10 OR S11 OR S12 OR S13 OR S14 OR S15 OR S16 OR S17                                                                                                                                                                       | 326,783 |
| S17 | TI ( (drug N1 (habit or tak* or hard or illicit or inject*)) ) OR AB ( (drug N1 (habit or tak* or hard or illicit or inject*)) )                                                                                                                   | 16,744  |
| S16 | TI ( ((alcohol or drug* or substance*) N2 (misuse* or abuse* or use* or addict* or dependenc* or issue* or problem*)) ) OR AB ( ((alcohol or drug* or substance*) N2 (misuse* or abuse* or use* or addict* or dependenc* or issue* or problem*)) ) | 132,015 |
| S15 | (MH "Behavior, Addictive")                                                                                                                                                                                                                         | 7,159   |
| S14 | (MH "Substance Abusers+")                                                                                                                                                                                                                          | 9,952   |
| S13 | (MH "Substance Use Disorders+")                                                                                                                                                                                                                    | 182,899 |
| S12 | TI "street drink*" OR AB "street drink*"                                                                                                                                                                                                           | 6       |
| S11 | TI ( (alcoholic* N3 (person or people or adult or parent* or family)) ) OR AB ( (alcoholic* N3 (person or people or adult or parent* or family)) )                                                                                                 | 429     |
| S10 | (MH "Alcoholics")                                                                                                                                                                                                                                  | 730     |
| S9  | (MH "Alcoholism")                                                                                                                                                                                                                                  | 17,654  |
| S8  | (MH "Alcohol Drinking")                                                                                                                                                                                                                            | 33,696  |
| S7  | TI ( (smoking or cigarette* or tobacco) ) OR AB ( (smoking or cigarette* or tobacco) )                                                                                                                                                             | 114,101 |

|    |                                                                                                                                                                                                                |        |
|----|----------------------------------------------------------------------------------------------------------------------------------------------------------------------------------------------------------------|--------|
| S6 | (MH "Smoking")                                                                                                                                                                                                 | 65,404 |
| S5 | S1 OR S2 OR S3 OR S4                                                                                                                                                                                           | 51,836 |
| S4 | TI ( ((dental or oral or tooth or teeth or mouth) N3 (health or care or hygiene or rehabilitation)) ) OR AB ( ((dental or oral or tooth or teeth or mouth) N3 (health or care or hygiene or rehabilitation)) ) | 33,755 |
| S3 | (MH "Dental Health Services+")                                                                                                                                                                                 | 20,382 |
| S2 | (MH "Oral Health")                                                                                                                                                                                             | 14,782 |
| S1 | (MH "Oral Hygiene")                                                                                                                                                                                            | 6,534  |

**Scopus** – search run on 6<sup>th</sup> February 2023

### 2846 results

( TITLE-ABS-  
 KEY ( ( program\* OR policy OR policies OR strateg\* OR scheme\* OR project\* OR initiative\* OR "care package" OR training OR educat\* OR pilot OR guidance OR guideline\* OR study OR pathway OR treatment\* OR promot\* OR management OR "support group" OR process\* OR trial\* OR intervention\* ) W/5 ( evaluat\* OR effect\* OR measur\* OR assess\* OR experiment\* OR impact\* OR feasab\* OR acceptab\* OR efficacy OR perception\* OR belief\* OR uptake OR consequence\* OR attitud\* OR barrier\* OR facilit\* OR motivat\* OR experience\* OR implement\* OR adher\* OR retention OR retain\* OR reduc\* OR increas\* OR improv\* OR outcome\* OR cost\* OR benefit\* OR interview\* OR qualitative OR ethnograph\* OR "focus group\*" ) OR "housing first" OR ( outcome\* W/5 evaluat\* ) ) ) AND ( ( TITLE-ABS-  
 KEY ( ( severe AND multiple AND disadvantage\* ) OR homeless\* OR ( ( hous\* OR home\* OR accommodat\* OR shelter ) W/3 ( insecur\* OR instability OR unstable OR stability ) ) ) ) OR ( ( TITLE-ABS-  
 KEY ( probationer\* OR parolee\* OR "criminal justice" ) ) OR ( TITLE-ABS-  
 KEY ( former W/3 inmate\* ) ) OR ( TITLE-ABS-  
 KEY ( ( community OR probation\* OR parole\* OR reintegrat\* ) W/4 ( prison\* OR offender\* OR criminal\* OR convict\* OR inmate\* ) ) ) OR ( TITLE-ABS-  
 KEY ( ( individuals OR men OR women ) W/2 ( probation OR parole ) ) ) OR ( TITLE-ABS-  
 KEY ( ( reintegrate\* OR reent\* OR return\* ) W/3 community ) ) OR ( TITLE-ABS-  
 KEY ( ( repeat\* OR ex OR re OR "revolving door" OR habitual OR multiple OR former\* OR previously\* ) W/1 ( offen\* OR convict\* OR prisoner\* OR imprison\* OR incarcerat\* OR criminal\* ) ) ) ) AND ( ( TITLE-ABS-  
 KEY ( ( dental OR oral OR tooth OR teeth OR mouth ) W/3 ( health OR care OR hygiene OR rehabilitation ) ) ) OR ( TITLE-ABS-KEY ( smoking OR cigarette\* OR tobacco ) ) OR ( TITLE-ABS-KEY ( "alcohol drinking" OR alcoholism OR ( alcoholic\* W/3 ( person\* OR people OR adult OR parent\* OR family ) ) OR "street drink" ) ) ) OR ( TITLE-ABS-  
 KEY ( ( alcohol OR drug\* OR substance\* ) W/2 ( misuse\* OR abuse\* OR use\* OR addict\* OR depende

nc\* OR issue\* OR problem OR disorder\* ) OR ( drug W/1 ( habit OR tak\* OR hard OR illicit OR inject\* ) ) ) OR ( TITLE-ABS-  
KEY ( ( sugar OR sucrose OR fructose OR glucose ) W/2 ( intake OR consum\* ) OR diet\* OR "sugary food\*" OR ( ( processed OR acidic ) W/1 food\* ) OR ( ( sugary OR fizzy OR carbonated OR soft OR sweetened ) W/1 ( drink\* OR beverage\* ) ) OR soda ) ) AND NOT INDEX ( medline ) )
